# Supplementary material for: NeRD: a multichannel neural network to predict cellular response of drugs by integrating multidimensional data
Source: Springer Nature journal article supplement (doi:10.1186/s12916-022-02549-0), 2022-10-17
Supplement: MOESM1 [file 23612088]

# **NeRD: a multichannel neural network to predict cellular response of drugs by integrating multidimensional data**

Xiaoxiao Cheng<sup>1,†</sup>, Chong Dai<sup>2,†</sup>, Yuqi Wen<sup>3</sup>, Xiaoqi Wang<sup>1</sup>, Xiaochen Bo<sup>3,\*</sup>,  
Song He<sup>3,\*</sup> and Shaoliang Peng<sup>1,4,\*</sup>

<sup>1</sup>College of Computer Science and Electronic Engineering, Hunan University, Changsha, 410082, China,

<sup>2</sup>College of Life Science and Technology, Beijing University of Chemical Technology, Beijing, 100029, China,

<sup>3</sup>Department of Biotechnology, Beijing Institute of Health Service and Transfusion Medicine, Beijing, 100850, China,

<sup>4</sup>The State Key Laboratory of Chemo/Biosensing and Chemometrics, Hunan University, Changsha, 410082, China.

**Table S1.** RDKit functions and their descriptions.

| Functions            | Descriptions                              |
|----------------------|-------------------------------------------|
| MolFromSmiles()      | Get a molecule object from SMILES.        |
| GetBonds()           | Get all the bonds in the molecule object. |
| GetSymbol()          | Get the symbol of an atom.                |
| GetDegree()          | Get the degree of an atom.                |
| GetTotalNumHs()      | Get the total number of hydrogens.        |
| GetImplicitValence() | Get the implicit value of an atom.        |
| GetIsAromatic()      | Get whether an atom is aromatic.          |

**Table S2.** Hyperparameters for NeRD. The adjustment of hyperparameters often has an important impact on the specific data set.

| Hyperparameter                      | Tuned values                                                                                        |
|-------------------------------------|-----------------------------------------------------------------------------------------------------|
| Dimensions after feature extraction | 32, 64, <b>128</b> , 256                                                                            |
| Dropout value                       | 0.2, 0.3, <b>0.5</b> , 1                                                                            |
| Number of fusion layers             | 1, 2, <b>3</b> , 4                                                                                  |
| Learning rate                       | $1 \times 10^{-2}$ , $1 \times 10^{-3}$ , <b><math>1 \times 10^{-4}</math></b> , $1 \times 10^{-5}$ |
| Batch size                          | 128, 256, 512, <b>1024</b> , 2048                                                                   |
| Epoch number                        | 100, 200, <b>300</b> , 400, 500                                                                     |

Note: Bold numbers represent optimal parameters.

**Table S3.** Hyperparameters for DeepCDR, CDRScan, tCNNS, and GraphDRP. These models are all dual-channel or quasi-dual-channel, so the same method is used to adjust the hyperparameters.

| Hyperparameter          | Tuned values                                                                      |
|-------------------------|-----------------------------------------------------------------------------------|
| Dropout value           | 0.1, 0.2, 0.3, 0.5, 1                                                             |
| Number of fusion layers | 1, 2, 3, 4                                                                        |
| Learning rate           | $1 \times 10^{-2}$ , $1 \times 10^{-3}$ , $1 \times 10^{-4}$ , $1 \times 10^{-5}$ |
| Batch size              | 128, 256, 512, 1024, 2048                                                         |
| Epoch number            | 100, 200, 300, 400, 500                                                           |

**Table S4.** Hyperparameters for RF. The parameters of the RF framework are few, and the parameter selection is generally to adjust the value of N\_estimators, i.e., the number of decision trees.

| Hyperparameter | Tuned values                   |
|----------------|--------------------------------|
| N_estimators   | 10, 100, 1000, 10000           |
| Max_features   | $\log_2 N$ , $\sqrt{N}$ , auto |

**Table S5.** Hyperparameters for SVR. Gamma is the coefficient of kernel functions, only valid for 'rbf', 'poly', and 'sigmoid'. The parameter Degree only works for 'kernel=poly'. C represents the

penalty coefficient of the error term. The larger C is, the greater the degree of penalty for wrongly classified samples.

| Hyperparameter | Tuned values                       |
|----------------|------------------------------------|
| Kernel         | 'linear', 'poly', 'rbf', 'sigmoid' |
| C              | 0.1, 1, 10, 100                    |
| Gamma          | 'auto', 'scale'                    |
| Degree         | 1, 2, 3                            |

**Table S6.** Hyperparameters for CNN. What we use here is the one-dimensional convolution function provided by pytorch.

| Hyperparameter                                 | Tuned values                                                                      |
|------------------------------------------------|-----------------------------------------------------------------------------------|
| Kernel size                                    | 4, 8, 16, 32                                                                      |
| Stride                                         | 1, 2, 3, 4                                                                        |
| Out_channels(including 3 convolutional layers) | {4, 8, 16}, {8, 16, 32}, {16, 32, 64}                                             |
| Learning rate                                  | $1 \times 10^{-2}$ , $1 \times 10^{-3}$ , $1 \times 10^{-4}$ , $1 \times 10^{-5}$ |
| Batch size                                     | 128, 256, 512, 1024, 2048                                                         |
| Epoch number                                   | 100, 200, 300, 400, 500                                                           |

**Table S7.** Hyperparameters for MLP. The number of neurons in each layer is also fine-tuned according to the number of hidden layers.

| Hyperparameter          | Tuned values                                                                      |
|-------------------------|-----------------------------------------------------------------------------------|
| Number of hidden layers | 1, 2, 3, 4                                                                        |
| Dropout value           | 0.2, 0.3, 0.5, 1                                                                  |
| Learning rate           | $1 \times 10^{-2}$ , $1 \times 10^{-3}$ , $1 \times 10^{-4}$ , $1 \times 10^{-5}$ |
| Batch size              | 128, 256, 512, 1024, 2048                                                         |
| Epoch number            | 100, 200, 300, 400, 500                                                           |

**Table S8.** Hyperparameters for SRMF. SRMF is a method based on matrix factorization, and its hyperparameters mainly include the dimension of the feature space and the regularization parameters.

| Hyperparameter                          | Tuned values                                                             |
|-----------------------------------------|--------------------------------------------------------------------------|
| Dimensionality of the feature space $K$ | 10~50                                                                    |
| Regularization parameter $\lambda_l$    | $2^{-3}$ , $2^{-2}$ , $2^{-1}$ , $2^0$ , $2^1$ , $2^2$                   |
| Regularization parameter $\lambda_c$    | $2^{-5}$ , $2^{-4}$ , $2^{-3}$ , $2^{-2}$ , $2^{-1}$ , $2^0$ , $2^1$ , 0 |
| Regularization parameter $\lambda_d$    | $2^{-5}$ , $2^{-4}$ , $2^{-3}$ , $2^{-2}$ , $2^{-1}$ , $2^0$ , $2^1$ , 0 |
| maximum number of iterations            | 20, 50, 100, 200, 300                                                    |

**Table S9.** Hyperparameters for VAE+MLP. The number of neurons in each layer is also fine-tuned according to the number of hidden layers.

| Hyperparameter                 | Tuned values                                                                      |
|--------------------------------|-----------------------------------------------------------------------------------|
| Number of hidden layers in VAE | 2, 4, 6, 8                                                                        |
| Number of hidden layers in MLP | 1, 2, 3, 4                                                                        |
| Dropout value                  | 0.2, 0.3, 0.5, 1                                                                  |
| Learning rate                  | $1 \times 10^{-2}$ , $1 \times 10^{-3}$ , $1 \times 10^{-4}$ , $1 \times 10^{-5}$ |
| Batch size                     | 128, 256, 512, 1024, 2048                                                         |
| Epoch number                   | 100, 200, 300, 400, 500                                                           |

**Table S10.** Number of data instances corresponds to each data partition in the blind test.

|                        | Fold | Cell line blind test |                |          | Drug blind test |                |          |
|------------------------|------|----------------------|----------------|----------|-----------------|----------------|----------|
|                        |      | Training set         | Validation set | Test set | Training set    | Validation set | Test set |
| Random division        | 1    | 187188               | 23345          | 23275    | 195152          | 18973          | 19683    |
|                        | 2    | 184025               | 25841          | 23942    | 196460          | 19181          | 18167    |
|                        | 3    | 186909               | 24450          | 22449    | 184921          | 24430          | 24457    |
|                        | 4    | 188686               | 24632          | 20490    | 180081          | 28311          | 25416    |
|                        | 5    | 188949               | 22398          | 22461    | 178622          | 26498          | 28688    |
| Division by similarity | 1    | 189591               | 23093          | 21124    | 193714          | 22750          | 17344    |
|                        | 2    | 187149               | 24559          | 22100    | 188684          | 24911          | 20213    |
|                        | 3    | 188542               | 23104          | 22162    | 188396          | 22788          | 22624    |
|                        | 4    | 186832               | 23628          | 23348    | 183790          | 25825          | 24193    |
|                        | 5    | 183865               | 26038          | 23905    | 180966          | 26695          | 26147    |

**Table S11.** Dataset comparison. The dataset used in this paper contains 1448 drugs and 388 cell lines, compared to 135 drugs and 652 cell lines in the original study. The huge drug quantity gap may be one of the reasons for the performance loss. In addition, for the SRMF model, the similarity matrix is the key factor of the method. The overall similarity of the drugs used in this paper is lower, which may be another important factor in the loss of performance. Besides, the drug response matrix we used was sparser (44.5%) compared to the data in the original study (96.9%). This will increase the difficulty of the prediction of the SRMF model, resulting in a loss of performance.

|                                 | PRISM <sub>(NeRD)</sub> | GDSC <sub>(SRMF)</sub> |
|---------------------------------|-------------------------|------------------------|
| Number of drugs                 | 1448                    | 135                    |
| Number of cell lines            | 388                     | 652                    |
| Mean similarity of drugs        | 0.3710                  | 0.4654                 |
| Mean similarity of cell lines   | 0.8482                  | 0.8529                 |
| Density of drug response matrix | 44.5%                   | 96.9%                  |

**Table S12.** Blind test dividing data by similarity. Set1-Set5 are test sets with increasing similarity. Set1 has the lowest similarity and Set5 has the highest similarity. The values are the Pearson correlation coefficients.

|          | Blind cell line test |              |              |              |              | Blind drug test |              |              |              |              |
|----------|----------------------|--------------|--------------|--------------|--------------|-----------------|--------------|--------------|--------------|--------------|
|          | Set1                 | Set2         | Set3         | Set4         | Set5         | Set1            | Set2         | Set3         | Set4         | Set5         |
| LR       | 0.223                | 0.230        | 0.234        | 0.235        | 0.236        | 0.013           | 0.168        | 0.130        | 0.223        | 0.211        |
| SVR-L    | 0.053                | 0.094        | 0.122        | 0.148        | 0.173        | 0.064           | 0.179        | 0.106        | 0.136        | 0.092        |
| SVR      | 0.446                | 0.460        | 0.458        | 0.492        | 0.497        | -0.103          | 0.236        | 0.032        | 0.261        | 0.158        |
| RF       | 0.680                | 0.685        | 0.729        | 0.683        | 0.751        | -0.106          | 0.161        | 0.082        | 0.266        | 0.067        |
| MLP      | 0.766                | 0.785        | 0.823        | 0.833        | 0.824        | -0.152          | 0.139        | 0.138        | 0.245        | 0.236        |
| CNN      | 0.747                | 0.788        | 0.816        | 0.824        | 0.829        | 0.004           | 0.287        | 0.165        | 0.299        | 0.106        |
| SRMF     | 0.812                | <b>0.831</b> | 0.824        | 0.844        | 0.843        | 0.084           | 0.092        | 0.074        | 0.161        | 0.120        |
| VAE+MLP  | 0.753                | 0.773        | 0.803        | 0.806        | 0.812        | 0.064           | 0.164        | 0.064        | 0.010        | 0.093        |
| DeepCDR  | 0.725                | 0.750        | 0.754        | 0.789        | 0.772        | 0.201           | 0.220        | 0.049        | 0.165        | 0.159        |
| CDRScan  | 0.784                | 0.791        | 0.808        | 0.823        | 0.832        | 0.001           | 0.303        | 0.163        | 0.298        | 0.118        |
| tCNNS    | 0.793                | 0.791        | 0.817        | 0.833        | 0.830        | 0.002           | 0.294        | 0.168        | 0.216        | 0.062        |
| GraphDRP | 0.801                | 0.808        | 0.828        | 0.838        | 0.845        | 0.174           | 0.195        | <b>0.238</b> | 0.169        | 0.189        |
| NeRD     | <b>0.814</b>         | 0.823        | <b>0.834</b> | <b>0.850</b> | <b>0.862</b> | <b>0.181</b>    | <b>0.317</b> | 0.217        | <b>0.390</b> | <b>0.268</b> |

**Table S13.** Predicted results for the top 1% of drug-cell lines. We used the trained NERD model to predict drug cell line pairs without IC50 data in the PRISM database, sorted from small to large according to the predicted IC50 value, and then screened the top 1% of drug-cell line pairs (altogether 2537 pairs across 383 cancer cell lines and 91 drugs).

| DepMap ID  | CCLC Name                          | Drug name    | PubChem ID | Predict IC <sub>50</sub> |
|------------|------------------------------------|--------------|------------|--------------------------|
| ACH-000946 | HEC265_ENDOMETRIUM                 | colchicine   | 6167       | 0.027812649              |
| ACH-000756 | GII_CENTRAL_NERVOUS_SYSTEM         | colchicine   | 6167       | 0.028502241              |
| ACH-001318 | PLCPRF5_LIVER                      | colchicine   | 6167       | 0.028582329              |
| ACH-000885 | TOV21G_OVARY                       | docetaxel    | 148124     | 0.030135668              |
| ACH-000750 | LOXIMVI_SKIN                       | docetaxel    | 148124     | 0.031132214              |
| ACH-000532 | SNU61_LARGE_INTESTINE              | colchicine   | 6167       | 0.031229235              |
| ACH-000364 | U2OS_BONE                          | colchicine   | 6167       | 0.03145944               |
| ACH-000846 | FADU_UPPER_AERODIGESTIVE_TRACT     | docetaxel    | 148124     | 0.031794277              |
| ACH-000221 | SNU398_LIVER                       | docetaxel    | 148124     | 0.03207263               |
| ACH-000897 | FTC238_THYROID                     | colchicine   | 6167       | 0.032312248              |
| ACH-000756 | GII_CENTRAL_NERVOUS_SYSTEM         | filanesib    | 44224257   | 0.032343896              |
| ACH-000023 | PATU8988T_PANCREAS                 | JNJ-26481585 | 11538455   | 0.032353394              |
| ACH-000885 | TOV21G_OVARY                       | filanesib    | 44224257   | 0.032439379              |
| ACH-000123 | COV434_OVARY                       | docetaxel    | 148124     | 0.032635068              |
| ACH-000832 | CAL27_UPPER_AERODIGESTIVE_TRACT    | JNJ-26481585 | 11538455   | 0.033168092              |
| ACH-000091 | OV56_OVARY                         | docetaxel    | 148124     | 0.033323513              |
| ACH-000048 | TOV112D_OVARY                      | alvespimycin | 5288674    | 0.033880365              |
| ACH-000619 | PECAPJ15_UPPER_AERODIGESTIVE_TRACT | filanesib    | 44224257   | 0.033883909              |
| ACH-000605 | TE6_OESOPHAGUS                     | alvespimycin | 5288674    | 0.034012375              |
| ACH-000361 | SKHEP1_LIVER                       | filanesib    | 44224257   | 0.034098738              |

|            |                                  |              |           |             |
|------------|----------------------------------|--------------|-----------|-------------|
| ACH-000846 | FADU_UPPER_AERODIGESTIVE_TRACT   | filanesib    | 44224257  | 0.034153807 |
| ACH-000670 | SBC5_LUNG                        | NVP-AUY922   | 135539077 | 0.034210904 |
| ACH-000351 | MKN1_STOMACH                     | docetaxel    | 148124    | 0.034577822 |
| ACH-000169 | RD_SOFT_TISSUE                   | NSC-319726   | 5921672   | 0.034719702 |
| ACH-000280 | SNU840_OVARY                     | docetaxel    | 148124    | 0.034728285 |
| ACH-000849 | MDAMB468_BREAST                  | docetaxel    | 148124    | 0.034861892 |
| ACH-000221 | SNU398_LIVER                     | filanesib    | 44224257  | 0.03493805  |
| ACH-000091 | OV56_OVARY                       | NVP-AUY922   | 135539077 | 0.034965993 |
| ACH-000832 | CAL27_UPPER_AERODIGESTIVE_TRACT  | alvespimycin | 5288674   | 0.035035707 |
| ACH-000228 | BICR31_UPPER_AERODIGESTIVE_TRACT | docetaxel    | 148124    | 0.035210738 |
| ACH-000845 | NCIH1373_LUNG                    | alvespimycin | 5288674   | 0.035248591 |
| ACH-000670 | SBC5_LUNG                        | ganetespib   | 135564985 | 0.035254725 |
| ACH-000756 | G11_CENTRAL_NERVOUS_SYSTEM       | alvespimycin | 5288674   | 0.035321247 |
| ACH-000090 | PC3_PROSTATE                     | docetaxel    | 148124    | 0.035334522 |
| ACH-000885 | TOV21G_OVARY                     | paclitaxel   | 36314     | 0.035348577 |
| ACH-000091 | OV56_OVARY                       | filanesib    | 44224257  | 0.035683645 |
| ACH-000749 | DMS273_LUNG                      | docetaxel    | 148124    | 0.035688902 |
| ACH-000946 | HEC265_ENDOMETRIUM               | LY2606368    | 46700756  | 0.035747895 |
| ACH-000853 | NCIH661_LUNG                     | JNJ-26481585 | 11538455  | 0.035851104 |
| ACH-000890 | SW1271_LUNG                      | filanesib    | 44224257  | 0.035932698 |
| ACH-000994 | HEC59_ENDOMETRIUM                | filanesib    | 44224257  | 0.036010954 |
| ACH-000994 | HEC59_ENDOMETRIUM                | alvespimycin | 5288674   | 0.036046648 |
| ACH-000911 | NUGC3_STOMACH                    | NVP-AUY922   | 135539077 | 0.036245701 |
| ACH-000231 | KALS1_CENTRAL_NERVOUS_SYSTEM     | filanesib    | 44224257  | 0.036387281 |
| ACH-000542 | HEYA8_OVARY                      | cabazitaxel  | 129009963 | 0.03641196  |
| ACH-000273 | SF539_CENTRAL_NERVOUS_SYSTEM     | alvespimycin | 5288674   | 0.036424857 |
| ACH-000929 | NCIH2110_LUNG                    | FK-866       | 6914657   | 0.036439304 |
| ACH-000351 | MKN1_STOMACH                     | NVP-AUY922   | 135539077 | 0.036499681 |
| ACH-000890 | SW1271_LUNG                      | docetaxel    | 148124    | 0.036505909 |
| ACH-000994 | HEC59_ENDOMETRIUM                | docetaxel    | 148124    | 0.036587127 |
| ACH-000444 | LU99_LUNG                        | filanesib    | 44224257  | 0.036600228 |
| ACH-000811 | SKOV3_OVARY                      | docetaxel    | 148124    | 0.036674492 |
| ACH-000885 | TOV21G_OVARY                     | ispinesib    | 6851740   | 0.036677704 |
| ACH-000280 | SNU840_OVARY                     | filanesib    | 44224257  | 0.036686219 |
| ACH-000954 | HEC1A_ENDOMETRIUM                | docetaxel    | 148124    | 0.036694161 |
| ACH-000996 | HEC251_ENDOMETRIUM               | docetaxel    | 148124    | 0.036772199 |
| ACH-000863 | DBTRG05MG_CENTRAL_NERVOUS_SYSTEM | docetaxel    | 148124    | 0.036801828 |
| ACH-000943 | RKO_LARGE_INTESTINE              | filanesib    | 44224257  | 0.036873729 |
| ACH-000749 | DMS273_LUNG                      | filanesib    | 44224257  | 0.036959474 |
| ACH-000632 | HS944T_SKIN                      | NVP-AUY922   | 135539077 | 0.036979065 |
| ACH-000142 | CAL29_URINARY_TRACT              | NVP-AUY922   | 135539077 | 0.037049626 |
| ACH-000211 | DAOY_CENTRAL_NERVOUS_SYSTEM      | FK-866       | 6914657   | 0.037078553 |
| ACH-000311 | NCIH2122_LUNG                    | delanzomib   | 24800541  | 0.037126063 |

|            |                                |              |           |             |
|------------|--------------------------------|--------------|-----------|-------------|
| ACH-000013 | ONCODG1_OVARY                  | NVP-AUY922   | 135539077 | 0.037153566 |
| ACH-000909 | JHUEM2_ENDOMETRIUM             | filanesib    | 44224257  | 0.037209309 |
| ACH-000846 | FADU_UPPER_AERODIGESTIVE_TRACT | paclitaxel   | 36314     | 0.0372512   |
| ACH-000696 | OVCAR8_OVARY                   | filanesib    | 44224257  | 0.037300905 |
| ACH-000288 | BT549_BREAST                   | alvespimycin | 5288674   | 0.037371532 |
| ACH-000955 | SNU407_LARGE_INTESTINE         | docetaxel    | 148124    | 0.037441603 |
| ACH-000901 | HCC1359_LUNG                   | filanesib    | 44224257  | 0.037447349 |
| ACH-000311 | NCIH2122_LUNG                  | FK-866       | 6914657   | 0.037499889 |
| ACH-000472 | HSC2_UPPER_AERODIGESTIVE_TRACT | docetaxel    | 148124    | 0.037503385 |
| ACH-000221 | SNU398_LIVER                   | alvespimycin | 5288674   | 0.037505158 |
| ACH-000488 | TE11_OESOPHAGUS                | NVP-AUY922   | 135539077 | 0.037507569 |
| ACH-000945 | NCIH650_LUNG                   | filanesib    | 44224257  | 0.037596928 |
| ACH-001075 | NCIH292_LUNG                   | docetaxel    | 148124    | 0.037610171 |
| ACH-000231 | KALS1_CENTRAL_NERVOUS_SYSTEM   | docetaxel    | 148124    | 0.03781132  |
| ACH-000845 | NCIH1373_LUNG                  | docetaxel    | 148124    | 0.037829613 |
| ACH-000142 | CAL29_URINARY_TRACT            | filanesib    | 44224257  | 0.037905251 |
| ACH-000407 | SNU685_ENDOMETRIUM             | filanesib    | 44224257  | 0.037930569 |
| ACH-000374 | HCC1143_BREAST                 | colchicine   | 6167      | 0.037940052 |
| ACH-000674 | NUGC4_STOMACH                  | NVP-AUY922   | 135539077 | 0.037996141 |
| ACH-000102 | GMS10_CENTRAL_NERVOUS_SYSTEM   | colchicine   | 6167      | 0.038011207 |
| ACH-000954 | HEC1A_ENDOMETRIUM              | filanesib    | 44224257  | 0.038015196 |
| ACH-000231 | KALS1_CENTRAL_NERVOUS_SYSTEM   | NVP-AUY922   | 135539077 | 0.038044504 |
| ACH-000846 | FADU_UPPER_AERODIGESTIVE_TRACT | NVP-AUY922   | 135539077 | 0.038051891 |
| ACH-000232 | U251MG_CENTRAL_NERVOUS_SYSTEM  | docetaxel    | 148124    | 0.038114543 |
| ACH-000312 | SKNB2_AUTONOMIC_GANGLIA        | docetaxel    | 148124    | 0.038189165 |
| ACH-000221 | SNU398_LIVER                   | paclitaxel   | 36314     | 0.038202578 |
| ACH-000627 | LCLC103H_LUNG                  | alvespimycin | 5288674   | 0.038207463 |
| ACH-000404 | K029AX_SKIN                    | colchicine   | 6167      | 0.038354866 |
| ACH-000730 | SKMEL5_SKIN                    | NVP-AUY922   | 135539077 | 0.038356718 |
| ACH-000562 | HCC78_LUNG                     | cabazitaxel  | 129009963 | 0.038361511 |
| ACH-000456 | BCPAP_THYROID                  | filanesib    | 44224257  | 0.03849857  |
| ACH-000812 | COLO783_SKIN                   | filanesib    | 44224257  | 0.038528623 |
| ACH-000288 | BT549_BREAST                   | NVP-AUY922   | 135539077 | 0.038587454 |
| ACH-000841 | NCIH2087_LUNG                  | alvespimycin | 5288674   | 0.038627598 |
| ACH-000231 | KALS1_CENTRAL_NERVOUS_SYSTEM   | alvespimycin | 5288674   | 0.038639792 |
| ACH-000837 | NCIH322_LUNG                   | docetaxel    | 148124    | 0.038689299 |
| ACH-000553 | SQ1_LUNG                       | FK-866       | 6914657   | 0.038771089 |
| ACH-000945 | NCIH650_LUNG                   | docetaxel    | 148124    | 0.03881806  |
| ACH-000060 | PANC1005_PANCREAS              | docetaxel    | 148124    | 0.038846238 |
| ACH-000047 | GCIY_STOMACH                   | alvespimycin | 5288674   | 0.038866496 |
| ACH-000717 | COLO680N_OESOPHAGUS            | docetaxel    | 148124    | 0.03889536  |
| ACH-000776 | ONS76_CENTRAL_NERVOUS_SYSTEM   | alvespimycin | 5288674   | 0.038901303 |
| ACH-000013 | ONCODG1_OVARY                  | ganetespi    | 135564985 | 0.038921855 |

|            |                                  |              |           |             |
|------------|----------------------------------|--------------|-----------|-------------|
| ACH-000853 | NCIH661_LUNG                     | NVP-AUY922   | 135539077 | 0.039075428 |
| ACH-000909 | JHUEM2_ENDOMETRIUM               | BNC105       | 24786555  | 0.039076466 |
| ACH-000270 | HPAC_PANCREAS                    | colchicine   | 6167      | 0.039146249 |
| ACH-000488 | TE11_OESOPHAGUS                  | FK-866       | 6914657   | 0.039156952 |
| ACH-000845 | NCIH1373_LUNG                    | ganetespi    | 135564985 | 0.039281285 |
| ACH-000890 | SW1271_LUNG                      | alvespimycin | 5288674   | 0.039287171 |
| ACH-000880 | AGS_STOMACH                      | docetaxel    | 148124    | 0.039302756 |
| ACH-000393 | HLF_LIVER                        | alvespimycin | 5288674   | 0.039327829 |
| ACH-000307 | PK1_PANCREAS                     | filanesib    | 44224257  | 0.039351509 |
| ACH-000563 | EBC1_LUNG                        | FK-866       | 6914657   | 0.039374785 |
| ACH-000232 | U251MG_CENTRAL_NERVOUS_SYSTEM    | filanesib    | 44224257  | 0.039375418 |
| ACH-000322 | HT144_SKIN                       | docetaxel    | 148124    | 0.039475354 |
| ACH-000493 | SNU423_LIVER                     | alvespimycin | 5288674   | 0.039480128 |
| ACH-000450 | MELHO_SKIN                       | docetaxel    | 148124    | 0.039603582 |
| ACH-000954 | HEC1A_ENDOMETRIUM                | alvespimycin | 5288674   | 0.039629642 |
| ACH-000614 | RVH421_SKIN                      | docetaxel    | 148124    | 0.039632022 |
| ACH-000332 | YAPC_PANCREAS                    | BI-2536      | 11364421  | 0.039742542 |
| ACH-000971 | HCT116_LARGE_INTESTINE           | alvespimycin | 5288674   | 0.039797107 |
| ACH-000849 | MDAMB468_BREAST                  | alvespimycin | 5288674   | 0.039875596 |
| ACH-000553 | SQ1_LUNG                         | filanesib    | 44224257  | 0.039910237 |
| ACH-000503 | BICR16_UPPER_AERODIGESTIVE_TRACT | FK-866       | 6914657   | 0.040017184 |
| ACH-000201 | A204_SOFT_TISSUE                 | filanesib    | 44224257  | 0.040084118 |
| ACH-000685 | L33_PANCREAS                     | alvespimycin | 5288674   | 0.040125644 |
| ACH-000651 | SW620_LARGE_INTESTINE            | docetaxel    | 148124    | 0.040163914 |
| ACH-000849 | MDAMB468_BREAST                  | paclitaxel   | 36314     | 0.040202646 |
| ACH-000090 | PC3_PROSTATE                     | paclitaxel   | 36314     | 0.040227701 |
| ACH-000778 | HSC3_UPPER_AERODIGESTIVE_TRACT   | paclitaxel   | 36314     | 0.040273136 |
| ACH-000008 | A101D_SKIN                       | docetaxel    | 148124    | 0.040289763 |
| ACH-000845 | NCIH1373_LUNG                    | NVP-AUY922   | 135539077 | 0.040374277 |
| ACH-000587 | NCIH1975_LUNG                    | docetaxel    | 148124    | 0.040378313 |
| ACH-000201 | A204_SOFT_TISSUE                 | paclitaxel   | 36314     | 0.040393621 |
| ACH-000632 | HS944T_SKIN                      | ganetespi    | 135564985 | 0.040413681 |
| ACH-000853 | NCIH661_LUNG                     | docetaxel    | 148124    | 0.040424179 |
| ACH-000974 | SNGM_ENDOMETRIUM                 | alvespimycin | 5288674   | 0.040434438 |
| ACH-000736 | SNU601_STOMACH                   | alvespimycin | 5288674   | 0.04043624  |
| ACH-000396 | J82_URINARY_TRACT                | filanesib    | 44224257  | 0.040461078 |
| ACH-000566 | SW1710_URINARY_TRACT             | NVP-AUY922   | 135539077 | 0.040469299 |
| ACH-000667 | HCC44_LUNG                       | FK-866       | 6914657   | 0.040482277 |
| ACH-000723 | YD10B_UPPER_AERODIGESTIVE_TRACT  | NVP-AUY922   | 135539077 | 0.040627074 |
| ACH-000562 | HCC78_LUNG                       | docetaxel    | 148124    | 0.040646264 |
| ACH-000720 | TCCSUP_URINARY_TRACT             | filanesib    | 44224257  | 0.04067027  |
| ACH-000232 | U251MG_CENTRAL_NERVOUS_SYSTEM    | NVP-AUY922   | 135539077 | 0.040675268 |
| ACH-000947 | OVK18_OVARY                      | paclitaxel   | 36314     | 0.040682912 |

|            |                                  |              |           |             |
|------------|----------------------------------|--------------|-----------|-------------|
| ACH-000603 | BEN_LUNG                         | LY2606368    | 46700756  | 0.040697662 |
| ACH-000994 | HEC59_ENDOMETRIUM                | NVP-AUY922   | 135539077 | 0.040747949 |
| ACH-000749 | DMS273_LUNG                      | alvespimycin | 5288674   | 0.040778894 |
| ACH-000335 | MSTO211H_PLEURA                  | alvespimycin | 5288674   | 0.040788977 |
| ACH-000878 | HCC15_LUNG                       | FK-866       | 6914657   | 0.040797334 |
| ACH-000090 | PC3_PROSTATE                     | NVP-AUY922   | 135539077 | 0.040835094 |
| ACH-000351 | MKN1_STOMACH                     | ganetespi    | 135564985 | 0.040895045 |
| ACH-000863 | DBTRG05MG_CENTRAL_NERVOUS_SYSTEM | alvespimycin | 5288674   | 0.040936553 |
| ACH-000019 | MCF7_BREAST                      | filanesib    | 44224257  | 0.040962776 |
| ACH-000318 | TE10_OESOPHAGUS                  | alvespimycin | 5288674   | 0.041042659 |
| ACH-000954 | HEC1A_ENDOMETRIUM                | NVP-AUY922   | 135539077 | 0.041057205 |
| ACH-000456 | BCPAP_THYROID                    | docetaxel    | 148124    | 0.041073792 |
| ACH-000813 | T3M10_LUNG                       | FK-866       | 6914657   | 0.041095904 |
| ACH-000505 | RKN_SOFT_TISSUE                  | bortezomib   | 387447    | 0.041131992 |
| ACH-000833 | RH30_SOFT_TISSUE                 | alvespimycin | 5288674   | 0.041168914 |
| ACH-000454 | HCC95_LUNG                       | docetaxel    | 148124    | 0.041218841 |
| ACH-000102 | GMS10_CENTRAL_NERVOUS_SYSTEM     | taltobulin   | 6918637   | 0.041279013 |
| ACH-000599 | PATU8902_PANCREAS                | docetaxel    | 148124    | 0.041285745 |
| ACH-000425 | UACC62_SKIN                      | alvespimycin | 5288674   | 0.041294223 |
| ACH-000810 | SKMEL30_SKIN                     | colchicine   | 6167      | 0.041348396 |
| ACH-000335 | MSTO211H_PLEURA                  | docetaxel    | 148124    | 0.041372962 |
| ACH-000450 | MELHO_SKIN                       | FK-866       | 6914657   | 0.04144013  |
| ACH-000047 | GCIY_STOMACH                     | MPI-0479605  | 46909588  | 0.041484122 |
| ACH-000840 | HCC366_LUNG                      | docetaxel    | 148124    | 0.041486358 |
| ACH-000396 | J82_URINARY_TRACT                | NVP-AUY922   | 135539077 | 0.041544766 |
| ACH-000407 | SNU685_ENDOMETRIUM               | alvespimycin | 5288674   | 0.041568273 |
| ACH-000012 | HCC827_LUNG                      | docetaxel    | 148124    | 0.04158538  |
| ACH-000765 | WM983B_SKIN                      | alvespimycin | 5288674   | 0.041586481 |
| ACH-000805 | COLO679_SKIN                     | docetaxel    | 148124    | 0.041593999 |
| ACH-000014 | HS294T_SKIN                      | docetaxel    | 148124    | 0.041604334 |
| ACH-000972 | HEC151_ENDOMETRIUM               | docetaxel    | 148124    | 0.041758869 |
| ACH-000749 | DMS273_LUNG                      | ganetespi    | 135564985 | 0.041781687 |
| ACH-000803 | COLO668_LUNG                     | JNJ-26481585 | 11538455  | 0.041830221 |
| ACH-000481 | NCIH2170_LUNG                    | NVP-AUY922   | 135539077 | 0.041901086 |
| ACH-000719 | RMGI_OVARY                       | NSC-319726   | 5921672   | 0.041969095 |
| ACH-000054 | HT1080_SOFT_TISSUE               | alvespimycin | 5288674   | 0.0419764   |
| ACH-000863 | DBTRG05MG_CENTRAL_NERVOUS_SYSTEM | pralatrexate | 148121    | 0.04199547  |
| ACH-000833 | RH30_SOFT_TISSUE                 | docetaxel    | 148124    | 0.041997303 |
| ACH-000791 | RERFLCAD1_LUNG                   | alvespimycin | 5288674   | 0.042004339 |
| ACH-001075 | NCIH292_LUNG                     | alvespimycin | 5288674   | 0.042079716 |
| ACH-000924 | NCIH2172_LUNG                    | docetaxel    | 148124    | 0.042094779 |
| ACH-000966 | IGROV1_OVARY                     | filanesib    | 44224257  | 0.04209576  |
| ACH-000368 | SNU1105_CENTRAL_NERVOUS_SYSTEM   | filanesib    | 44224257  | 0.042156505 |

|            |                                           |              |           |             |
|------------|-------------------------------------------|--------------|-----------|-------------|
| ACH-000715 | SNU1214_UPPER_AERODIGESTIVE_TRACT         | alvespimycin | 5288674   | 0.042181815 |
| ACH-000351 | MKN1_STOMACH                              | filanesib    | 44224257  | 0.042273352 |
| ACH-000579 | UACC257_SKIN                              | colchicine   | 6167      | 0.042344845 |
| ACH-000869 | NCIH1568_LUNG                             | alvespimycin | 5288674   | 0.04235494  |
| ACH-000950 | LOVO_LARGE_INTESTINE                      | alvespimycin | 5288674   | 0.042358813 |
| ACH-000628 | NCIH596_LUNG                              | filanesib    | 44224257  | 0.042361939 |
| ACH-000924 | NCIH2172_LUNG                             | filanesib    | 44224257  | 0.042362352 |
| ACH-000060 | PANC1005_PANCREAS                         | FK-866       | 6914657   | 0.042367016 |
| ACH-000846 | FADU_UPPER_AERODIGESTIVE_TRACT            | pralatrexate | 148121    | 0.042370765 |
| ACH-000231 | KALS1_CENTRAL_NERVOUS_SYSTEM              | paclitaxel   | 36314     | 0.042394957 |
| ACH-000901 | HCC1359_LUNG                              | FK-866       | 6914657   | 0.042396167 |
| ACH-000787 | LXF289_LUNG                               | docetaxel    | 148124    | 0.042440943 |
| ACH-000449 | MESSA_SOFT_TISSUE                         | filanesib    | 44224257  | 0.042605071 |
| ACH-000911 | NUGC3_STOMACH                             | ganetespiib  | 135564985 | 0.042624489 |
| ACH-000732 | PECAPJ41CLONED2_UPPER_AERODIGESTIVE_TRACT | filanesib    | 44224257  | 0.042685535 |
| ACH-000416 | NCIH838_LUNG                              | paclitaxel   | 36314     | 0.04269707  |
| ACH-000868 | HCC1195_LUNG                              | docetaxel    | 148124    | 0.042715259 |
| ACH-000351 | MKN1_STOMACH                              | alvespimycin | 5288674   | 0.042739359 |
| ACH-000841 | NCIH2087_LUNG                             | filanesib    | 44224257  | 0.042787684 |
| ACH-000996 | HEC251_ENDOMETRIUM                        | FK-866       | 6914657   | 0.042798991 |
| ACH-000308 | EFO21_OVARY                               | filanesib    | 44224257  | 0.042815011 |
| ACH-000549 | SNU1076_UPPER_AERODIGESTIVE_TRACT         | alvespimycin | 5288674   | 0.042819562 |
| ACH-000305 | ECG110_OESOPHAGUS                         | alvespimycin | 5288674   | 0.042848621 |
| ACH-000502 | TCCPAN2_PANCREAS                          | alvespimycin | 5288674   | 0.042854951 |
| ACH-000650 | IGR37_SKIN                                | ganetespiib  | 135564985 | 0.042919245 |
| ACH-000414 | NCIH1944_LUNG                             | FK-866       | 6914657   | 0.043011335 |
| ACH-000840 | HCC366_LUNG                               | alvespimycin | 5288674   | 0.043018788 |
| ACH-000449 | MESSA_SOFT_TISSUE                         | ispinesib    | 6851740   | 0.04303122  |
| ACH-000153 | NCIH2052_PLEURA                           | AZD8330      | 16666708  | 0.043200405 |
| ACH-000573 | MDAMB436_BREAST                           | filanesib    | 44224257  | 0.043201736 |
| ACH-000837 | NCIH322_LUNG                              | alvespimycin | 5288674   | 0.043264307 |
| ACH-000312 | SKNBE2_AUTONOMIC_GANGLIA                  | NVP-AUY922   | 135539077 | 0.04326598  |
| ACH-000461 | SNU1196_BILIARY_TRACT                     | filanesib    | 44224257  | 0.043305253 |
| ACH-000232 | U251MG_CENTRAL_NERVOUS_SYSTEM             | ganetespiib  | 135564985 | 0.043345008 |
| ACH-000929 | NCIH2110_LUNG                             | NVP-AUY922   | 135539077 | 0.043345199 |
| ACH-000505 | RKN_SOFT_TISSUE                           | alvespimycin | 5288674   | 0.043362499 |
| ACH-000853 | NCIH661_LUNG                              | ganetespiib  | 135564985 | 0.043419308 |
| ACH-000212 | CAL120_BREAST                             | alvespimycin | 5288674   | 0.043429987 |
| ACH-000813 | T3M10_LUNG                                | NVP-AUY922   | 135539077 | 0.043487785 |
| ACH-000318 | TE10_OESOPHAGUS                           | NVP-AUY922   | 135539077 | 0.043488346 |
| ACH-000456 | BCPAP_THYROID                             | piperazine   | 4837      | 0.043528558 |
| ACH-000860 | NCIH358_LUNG                              | docetaxel    | 148124    | 0.043619425 |
| ACH-000396 | J82_URINARY_TRACT                         | FK-866       | 6914657   | 0.043623408 |

|            |                                  |              |           |             |
|------------|----------------------------------|--------------|-----------|-------------|
| ACH-000685 | L33_PANCREAS                     | ganetespi    | 135564985 | 0.043720529 |
| ACH-000235 | PANC0403_PANCREAS                | alvespimycin | 5288674   | 0.04373104  |
| ACH-000796 | MCAS_OVARY                       | pralatrexate | 148121    | 0.04374329  |
| ACH-000090 | PC3_PROSTATE                     | pralatrexate | 148121    | 0.043745881 |
| ACH-000102 | GMS10_CENTRAL_NERVOUS_SYSTEM     | FK-866       | 6914657   | 0.043758925 |
| ACH-000364 | U2OS_BONE                        | filanesib    | 44224257  | 0.043765548 |
| ACH-000182 | SNU869_BILIARY_TRACT             | alvespimycin | 5288674   | 0.04378519  |
| ACH-000308 | EFO21_OVARY                      | docetaxel    | 148124    | 0.043821295 |
| ACH-000984 | HEC6_ENDOMETRIUM                 | docetaxel    | 148124    | 0.043835674 |
| ACH-000976 | HUCCT1_BILIARY_TRACT             | NVP-AUY922   | 135539077 | 0.043870391 |
| ACH-000308 | EFO21_OVARY                      | alvespimycin | 5288674   | 0.043939943 |
| ACH-000361 | SKHEP1_LIVER                     | pralatrexate | 148121    | 0.043959657 |
| ACH-000791 | RERFLCAD1_LUNG                   | NVP-AUY922   | 135539077 | 0.043975564 |
| ACH-000332 | YAPC_PANCREAS                    | vindesine    | 40839     | 0.043995045 |
| ACH-000312 | SKNBE2_AUTONOMIC_GANGLIA         | filanesib    | 44224257  | 0.044044649 |
| ACH-000359 | MG63_BONE                        | NVP-AUY922   | 135539077 | 0.044049498 |
| ACH-000305 | ECG110_OESOPHAGUS                | NVP-AUY922   | 135539077 | 0.044121813 |
| ACH-000976 | HUCCT1_BILIARY_TRACT             | docetaxel    | 148124    | 0.04412564  |
| ACH-000778 | HSC3_UPPER_AERODIGESTIVE_TRACT   | filanesib    | 44224257  | 0.044135961 |
| ACH-000628 | NCIH596_LUNG                     | docetaxel    | 148124    | 0.044143692 |
| ACH-000955 | SNU407_LARGE_INTESTINE           | filanesib    | 44224257  | 0.044182533 |
| ACH-000762 | YD38_UPPER_AERODIGESTIVE_TRACT   | FK-866       | 6914657   | 0.044202684 |
| ACH-000264 | CALU6_LUNG                       | dinacilib    | 46926350  | 0.044249018 |
| ACH-000228 | BICR31_UPPER_AERODIGESTIVE_TRACT | filanesib    | 44224257  | 0.044317822 |
| ACH-000182 | SNU869_BILIARY_TRACT             | ganetespi    | 135564985 | 0.044333695 |
| ACH-000461 | SNU1196_BILIARY_TRACT            | alvespimycin | 5288674   | 0.044359002 |
| ACH-000717 | COLO680N_OESOPHAGUS              | filanesib    | 44224257  | 0.044365618 |
| ACH-000628 | NCIH596_LUNG                     | alvespimycin | 5288674   | 0.044394369 |
| ACH-000359 | MG63_BONE                        | filanesib    | 44224257  | 0.044406747 |
| ACH-000582 | COLO741_SKIN                     | alvespimycin | 5288674   | 0.044407064 |
| ACH-000835 | GCT_SOFT_TISSUE                  | filanesib    | 44224257  | 0.044449262 |
| ACH-000280 | SNU840_OVARY                     | paclitaxel   | 36314     | 0.044450804 |
| ACH-000954 | HEC1A_ENDOMETRIUM                | ganetespi    | 135564985 | 0.04448413  |
| ACH-000869 | NCIH1568_LUNG                    | NVP-AUY922   | 135539077 | 0.044535619 |
| ACH-000785 | NCIH2126_LUNG                    | docetaxel    | 148124    | 0.044552419 |
| ACH-000678 | MKN7_STOMACH                     | alvespimycin | 5288674   | 0.044562823 |
| ACH-000991 | SNU81_LARGE_INTESTINE            | docetaxel    | 148124    | 0.044659182 |
| ACH-000427 | NCIN87_STOMACH                   | FK-866       | 6914657   | 0.044689313 |
| ACH-000141 | SNU308_BILIARY_TRACT             | NSC-319726   | 5921672   | 0.044748029 |
| ACH-000231 | KALS1_CENTRAL_NERVOUS_SYSTEM     | ganetespi    | 135564985 | 0.044754338 |
| ACH-000994 | HEC59_ENDOMETRIUM                | ganetespi    | 135564985 | 0.044817301 |
| ACH-000882 | IGR1_SKIN                        | alvespimycin | 5288674   | 0.044834827 |
| ACH-000684 | KMRC1_KIDNEY                     | colchicine   | 6167      | 0.044840898 |

|            |                                      |              |           |             |
|------------|--------------------------------------|--------------|-----------|-------------|
| ACH-000090 | PC3_PROSTATE                         | ganetespi    | 135564985 | 0.044850811 |
| ACH-000599 | PATU8902_PANCREAS                    | FK-866       | 6914657   | 0.044953447 |
| ACH-000805 | COLO679_SKIN                         | BNC105       | 24786555  | 0.045022366 |
| ACH-000833 | RH30_SOFT_TISSUE                     | bortezomib   | 387447    | 0.045040052 |
| ACH-000535 | BXPC3_PANCREAS                       | epothilone-b | 129010071 | 0.04504641  |
| ACH-000599 | PATU8902_PANCREAS                    | filanesib    | 44224257  | 0.045120422 |
| ACH-000408 | TE5_OESOPHAGUS                       | alvespimycin | 5288674   | 0.045140976 |
| ACH-000147 | T47D_BREAST                          | filanesib    | 44224257  | 0.045161877 |
| ACH-000599 | PATU8902_PANCREAS                    | alvespimycin | 5288674   | 0.045167574 |
| ACH-000308 | EFO21_OVARY                          | FK-866       | 6914657   | 0.045169038 |
| ACH-000035 | NCIH1650_LUNG                        | docetaxel    | 148124    | 0.045174314 |
| ACH-000396 | J82_URINARY_TRACT                    | pralatrexate | 148121    | 0.045188736 |
| ACH-000845 | NCIH1373_LUNG                        | paclitaxel   | 36314     | 0.045271166 |
| ACH-000023 | PATU8988T_PANCREAS                   | pralatrexate | 148121    | 0.045287879 |
| ACH-000393 | HLF_LIVER                            | paclitaxel   | 36314     | 0.045293139 |
| ACH-000721 | HMC18_BREAST                         | pralatrexate | 148121    | 0.045318283 |
| ACH-000461 | SNU1196_BILIARY_TRACT                | vincristine  | 5388993   | 0.045345743 |
| ACH-000237 | JHOM1_OVARY                          | pralatrexate | 148121    | 0.045358931 |
| ACH-000502 | TCCPAN2_PANCREAS                     | selinexor    | 71481097  | 0.045497729 |
| ACH-000035 | NCIH1650_LUNG                        | vindesine    | 40839     | 0.045540017 |
| ACH-000650 | IGR37_SKIN                           | NVP-AUY922   | 135539077 | 0.045553441 |
| ACH-000102 | GMS10_CENTRAL_NERVOUS_SYSTEM         | alvespimycin | 5288674   | 0.045608221 |
| ACH-000945 | NCIH650_LUNG                         | pralatrexate | 148121    | 0.045680118 |
| ACH-000886 | NCIH2009_LUNG                        | docetaxel    | 148124    | 0.045728338 |
| ACH-000423 | SKMEL3_SKIN                          | alvespimycin | 5288674   | 0.045742137 |
| ACH-000118 | HUPT3_PANCREAS                       | FK-866       | 6914657   | 0.045813079 |
| ACH-000097 | ZR751_BREAST                         | docetaxel    | 148124    | 0.045853316 |
| ACH-001239 | WM2664_SKIN                          | colchicine   | 6167      | 0.045869364 |
| ACH-000500 | SNU46_UPPER_AERODIGESTIVE_TRACT      | alvespimycin | 5288674   | 0.045869422 |
| ACH-000207 | DETROIT562_UPPER_AERODIGESTIVE_TRACT | filanesib    | 44224257  | 0.045879353 |
| ACH-000582 | COLO741_SKIN                         | ganetespi    | 135564985 | 0.045880896 |
| ACH-000805 | COLO679_SKIN                         | alvespimycin | 5288674   | 0.045938565 |
| ACH-000277 | HCC1419_BREAST                       | alvespimycin | 5288674   | 0.046068693 |
| ACH-000035 | NCIH1650_LUNG                        | bortezomib   | 387447    | 0.046070208 |
| ACH-000878 | HCC15_LUNG                           | pralatrexate | 148121    | 0.04607466  |
| ACH-000853 | NCIH661_LUNG                         | alvespimycin | 5288674   | 0.046131602 |
| ACH-000720 | TCCSUP_URINARY_TRACT                 | docetaxel    | 148124    | 0.046144302 |
| ACH-000147 | T47D_BREAST                          | NVP-AUY922   | 135539077 | 0.046175842 |
| ACH-000869 | NCIH1568_LUNG                        | docetaxel    | 148124    | 0.046181565 |
| ACH-000879 | MFE296_ENDOMETRIUM                   | alvespimycin | 5288674   | 0.046192409 |
| ACH-000324 | JHOC5_OVARY                          | alvespimycin | 5288674   | 0.046196546 |
| ACH-000837 | NCIH322_LUNG                         | bortezomib   | 387447    | 0.046246483 |
| ACH-000845 | NCIH1373_LUNG                        | pralatrexate | 148121    | 0.046322229 |

|            |                                 |              |           |             |
|------------|---------------------------------|--------------|-----------|-------------|
| ACH-000856 | CAL51_BREAST                    | JNJ-26481585 | 11538455  | 0.046360243 |
| ACH-000014 | HS294T_SKIN                     | alvespimycin | 5288674   | 0.046361376 |
| ACH-000880 | AGS_STOMACH                     | paclitaxel   | 36314     | 0.046369348 |
| ACH-000885 | TOV21G_OVARY                    | pralatrexate | 148121    | 0.046376253 |
| ACH-000994 | HEC59_ENDOMETRIUM               | paclitaxel   | 36314     | 0.0464072   |
| ACH-000147 | T47D_BREAST                     | docetaxel    | 148124    | 0.046425055 |
| ACH-000954 | HEC1A_ENDOMETRIUM               | paclitaxel   | 36314     | 0.046464785 |
| ACH-000318 | TE10_OESOPHAGUS                 | filanesib    | 44224257  | 0.046541724 |
| ACH-000212 | CAL120_BREAST                   | filanesib    | 44224257  | 0.04659381  |
| ACH-000142 | CAL29_URINARY_TRACT             | pralatrexate | 148121    | 0.046608841 |
| ACH-000332 | YAPC_PANCREAS                   | alvespimycin | 5288674   | 0.046653526 |
| ACH-000766 | NCIH1648_LUNG                   | pralatrexate | 148121    | 0.046751007 |
| ACH-000991 | SNU81_LARGE_INTESTINE           | alvespimycin | 5288674   | 0.046805897 |
| ACH-000457 | CAL54_KIDNEY                    | selinexor    | 71481097  | 0.046808356 |
| ACH-000359 | MG63_BONE                       | docetaxel    | 148124    | 0.046852152 |
| ACH-000312 | SKNBE2_AUTONOMIC_GANGLIA        | ganetespi    | 135564985 | 0.046877401 |
| ACH-000990 | HEC108_ENDOMETRIUM              | alvespimycin | 5288674   | 0.046884551 |
| ACH-000749 | DMS273_LUNG                     | pralatrexate | 148121    | 0.046945195 |
| ACH-000221 | SNU398_LIVER                    | ispinesib    | 6851740   | 0.04695877  |
| ACH-000837 | NCIH322_LUNG                    | FK-866       | 6914657   | 0.046967502 |
| ACH-000768 | MDAMB231_BREAST                 | filanesib    | 44224257  | 0.046984904 |
| ACH-000843 | HARA_LUNG                       | alvespimycin | 5288674   | 0.046989445 |
| ACH-000791 | RERFLCAD1_LUNG                  | docetaxel    | 148124    | 0.046995138 |
| ACH-000318 | TE10_OESOPHAGUS                 | ganetespi    | 135564985 | 0.047007686 |
| ACH-000182 | SNU869_BILIARY_TRACT            | filanesib    | 44224257  | 0.047015267 |
| ACH-000561 | TT_OESOPHAGUS                   | pralatrexate | 148121    | 0.04701949  |
| ACH-000019 | MCF7_BREAST                     | alvespimycin | 5288674   | 0.04702702  |
| ACH-000967 | SNUC2A_LARGE_INTESTINE          | filanesib    | 44224257  | 0.047034933 |
| ACH-000472 | HSC2_UPPER_AERODIGESTIVE_TRACT  | paclitaxel   | 36314     | 0.047068531 |
| ACH-000967 | SNUC2A_LARGE_INTESTINE          | docetaxel    | 148124    | 0.047068594 |
| ACH-000318 | TE10_OESOPHAGUS                 | docetaxel    | 148124    | 0.04707679  |
| ACH-000955 | SNU407_LARGE_INTESTINE          | alvespimycin | 5288674   | 0.047087526 |
| ACH-000565 | RCM1_LARGE_INTESTINE            | ganetespi    | 135564985 | 0.047105359 |
| ACH-000776 | ONS76_CENTRAL_NERVOUS_SYSTEM    | docetaxel    | 148124    | 0.047133128 |
| ACH-000420 | SNU449_LIVER                    | bortezomib   | 387447    | 0.047158974 |
| ACH-000688 | OV7_OVARY                       | NSC-319726   | 5921672   | 0.047172285 |
| ACH-000138 | CFPAC1_PANCREAS                 | alvespimycin | 5288674   | 0.047183987 |
| ACH-000719 | RMGI_OVARY                      | docetaxel    | 148124    | 0.04721528  |
| ACH-000221 | SNU398_LIVER                    | pralatrexate | 148121    | 0.047215585 |
| ACH-000723 | YD10B_UPPER_AERODIGESTIVE_TRACT | ganetespi    | 135564985 | 0.047240997 |
| ACH-000417 | PANC0813_PANCREAS               | docetaxel    | 148124    | 0.047276837 |
| ACH-000091 | OV56_OVARY                      | ispinesib    | 6851740   | 0.047307233 |
| ACH-000903 | FTC133_THYROID                  | alvespimycin | 5288674   | 0.047333395 |

|            |                                    |              |           |             |
|------------|------------------------------------|--------------|-----------|-------------|
| ACH-000685 | L33_PANCREAS                       | docetaxel    | 148124    | 0.04739509  |
| ACH-000849 | MDAMB468_BREAST                    | NVP-AUY922   | 135539077 | 0.047396822 |
| ACH-000950 | LOVO_LARGE_INTESTINE               | NVP-AUY922   | 135539077 | 0.047454321 |
| ACH-000141 | SNU308_BILIARY_TRACT               | bortezomib   | 387447    | 0.04746766  |
| ACH-000853 | NCIH661_LUNG                       | bortezomib   | 387447    | 0.047474835 |
| ACH-000991 | SNU81_LARGE_INTESTINE              | filanesib    | 44224257  | 0.047504953 |
| ACH-000605 | TE6_OESOPHAGUS                     | pralatrexate | 148121    | 0.047512794 |
| ACH-000624 | HCC1806_BREAST                     | filanesib    | 44224257  | 0.047541803 |
| ACH-000450 | MELHO_SKIN                         | filanesib    | 44224257  | 0.04754436  |
| ACH-000312 | SKNB2_AUTONOMIC_GANGLIA            | alvespimycin | 5288674   | 0.0476179   |
| ACH-000841 | NCIH2087_LUNG                      | ganetespiib  | 135564985 | 0.047622438 |
| ACH-000532 | SNU61_LARGE_INTESTINE              | ganetespiib  | 135564985 | 0.047639043 |
| ACH-000542 | HEYA8_OVARY                        | alvespimycin | 5288674   | 0.047644337 |
| ACH-000417 | PANC0813_PANCREAS                  | filanesib    | 44224257  | 0.047711024 |
| ACH-000008 | A101D_SKIN                         | filanesib    | 44224257  | 0.047729232 |
| ACH-000123 | COV434_OVARY                       | ispinesib    | 6851740   | 0.0477496   |
| ACH-000808 | HUH28_BILIARY_TRACT                | alvespimycin | 5288674   | 0.047821438 |
| ACH-000562 | HCC78_LUNG                         | filanesib    | 44224257  | 0.047855033 |
| ACH-000444 | LU99_LUNG                          | pralatrexate | 148121    | 0.047861916 |
| ACH-000890 | SW1271_LUNG                        | paclitaxel   | 36314     | 0.047915419 |
| ACH-000427 | NCIN87_STOMACH                     | paclitaxel   | 36314     | 0.047921958 |
| ACH-000587 | NCIH1975_LUNG                      | paclitaxel   | 36314     | 0.047930556 |
| ACH-000359 | MG63_BONE                          | alvespimycin | 5288674   | 0.047964877 |
| ACH-000012 | HCC827_LUNG                        | filanesib    | 44224257  | 0.047977508 |
| ACH-000791 | RERFLCAD1_LUNG                     | ganetespiib  | 135564985 | 0.047989419 |
| ACH-000805 | COLO679_SKIN                       | FK-866       | 6914657   | 0.047992486 |
| ACH-000582 | COLO741_SKIN                       | NVP-AUY922   | 135539077 | 0.047999234 |
| ACH-000320 | PSN1_PANCREAS                      | filanesib    | 44224257  | 0.048016712 |
| ACH-000842 | SW480_LARGE_INTESTINE              | docetaxel    | 148124    | 0.048059429 |
| ACH-000027 | GOS3_CENTRAL_NERVOUS_SYSTEM        | FK-866       | 6914657   | 0.048083731 |
| ACH-000805 | COLO679_SKIN                       | paclitaxel   | 36314     | 0.048206216 |
| ACH-000735 | PECAPJ49_UPPER_AERODIGESTIVE_TRACT | pralatrexate | 148121    | 0.048248036 |
| ACH-000764 | SH10TC_STOMACH                     | pralatrexate | 148121    | 0.04825444  |
| ACH-000945 | NCIH650_LUNG                       | alvespimycin | 5288674   | 0.048280079 |
| ACH-000888 | NCIH1793_LUNG                      | FK-866       | 6914657   | 0.048319291 |
| ACH-000359 | MG63_BONE                          | vindesine    | 40839     | 0.048328764 |
| ACH-000593 | BC3C_URINARY_TRACT                 | NVP-AUY922   | 135539077 | 0.048389039 |
| ACH-000189 | RCC10RGB_KIDNEY                    | FK-866       | 6914657   | 0.048430482 |
| ACH-000837 | NCIH322_LUNG                       | NVP-AUY922   | 135539077 | 0.048435085 |
| ACH-000046 | ACHN_KIDNEY                        | alvespimycin | 5288674   | 0.0484499   |
| ACH-000423 | SKMEL3_SKIN                        | FK-866       | 6914657   | 0.048460383 |
| ACH-000880 | AGS_STOMACH                        | vindesine    | 40839     | 0.048489712 |
| ACH-000813 | T3M10_LUNG                         | ispinesib    | 6851740   | 0.048509098 |

|            |                               |                    |           |             |
|------------|-------------------------------|--------------------|-----------|-------------|
| ACH-000384 | SW780_URINARY_TRACT           | selinexor          | 71481097  | 0.048514027 |
| ACH-000133 | HS729_SOFT_TISSUE             | NVP-AUY922         | 135539077 | 0.048522475 |
| ACH-000990 | HEC108_ENDOMETRIUM            | FK-866             | 6914657   | 0.04857765  |
| ACH-000097 | ZR751_BREAST                  | filanesib          | 44224257  | 0.048591274 |
| ACH-000418 | SW1353_BONE                   | NVP-AUY922         | 135539077 | 0.048600259 |
| ACH-000833 | RH30_SOFT_TISSUE              | filanesib          | 44224257  | 0.048621974 |
| ACH-000322 | HT144_SKIN                    | combretastatin-A-4 | 5351344   | 0.048642328 |
| ACH-000717 | COLO680N_OESOPHAGUS           | paclitaxel         | 36314     | 0.048643583 |
| ACH-000138 | CFPAC1_PANCREAS               | NVP-AUY922         | 135539077 | 0.048677834 |
| ACH-000613 | HOS_BONE                      | pralatrexate       | 148121    | 0.048750507 |
| ACH-000985 | LS411N_LARGE_INTESTINE        | MPI-0479605        | 46909588  | 0.04878469  |
| ACH-000994 | HEC59_ENDOMETRIUM             | pralatrexate       | 148121    | 0.048803755 |
| ACH-000572 | G361_SKIN                     | alvespimycin       | 5288674   | 0.048833255 |
| ACH-000678 | MKN7_STOMACH                  | docetaxel          | 148124    | 0.04885078  |
| ACH-000416 | NCIH838_LUNG                  | filanesib          | 44224257  | 0.048871862 |
| ACH-000843 | HARA_LUNG                     | JNJ-26481585       | 11538455  | 0.048884938 |
| ACH-000836 | YD15_SALIVARY_GLAND           | docetaxel          | 148124    | 0.048889056 |
| ACH-000954 | HEC1A_ENDOMETRIUM             | pralatrexate       | 148121    | 0.048903787 |
| ACH-000802 | BFTC905_URINARY_TRACT         | alvespimycin       | 5288674   | 0.048908176 |
| ACH-000976 | HUCCT1_BILIARY_TRACT          | ganetespiib        | 135564985 | 0.048927935 |
| ACH-000895 | CL34_LARGE_INTESTINE          | filanesib          | 44224257  | 0.048960415 |
| ACH-000117 | EFM192A_BREAST                | alvespimycin       | 5288674   | 0.048980418 |
| ACH-000450 | MELHO_SKIN                    | paclitaxel         | 36314     | 0.048987547 |
| ACH-000946 | HEC265_ENDOMETRIUM            | pralatrexate       | 148121    | 0.048993602 |
| ACH-000139 | PANC0327_PANCREAS             | NVP-AUY922         | 135539077 | 0.049016211 |
| ACH-000008 | A101D_SKIN                    | paclitaxel         | 36314     | 0.049040768 |
| ACH-000232 | U251MG_CENTRAL_NERVOUS_SYSTEM | dinaciclib         | 46926350  | 0.049063859 |
| ACH-000454 | HCC95_LUNG                    | paclitaxel         | 36314     | 0.049110719 |
| ACH-000288 | BT549_BREAST                  | pralatrexate       | 148121    | 0.049116259 |
| ACH-000833 | RH30_SOFT_TISSUE              | paclitaxel         | 36314     | 0.049162739 |
| ACH-000054 | HT1080_SOFT_TISSUE            | MPI-0479605        | 46909588  | 0.049177661 |
| ACH-000161 | CORL105_LUNG                  | LY2606368          | 46700756  | 0.0492125   |
| ACH-000878 | HCC15_LUNG                    | dinaciclib         | 46926350  | 0.049248644 |
| ACH-000965 | RL952_ENDOMETRIUM             | pralatrexate       | 148121    | 0.04925456  |
| ACH-000945 | NCIH650_LUNG                  | paclitaxel         | 36314     | 0.049263523 |
| ACH-000805 | COLO679_SKIN                  | filanesib          | 44224257  | 0.049313435 |
| ACH-000868 | HCC1195_LUNG                  | filanesib          | 44224257  | 0.049319533 |
| ACH-000868 | HCC1195_LUNG                  | vindesine          | 40839     | 0.049331899 |
| ACH-000950 | LOVO_LARGE_INTESTINE          | filanesib          | 44224257  | 0.049350935 |
| ACH-000502 | TCCPAN2_PANCREAS              | vindesine          | 40839     | 0.049354325 |
| ACH-000717 | COLO680N_OESOPHAGUS           | NVP-AUY922         | 135539077 | 0.049355418 |
| ACH-000035 | NCIH1650_LUNG                 | paclitaxel         | 36314     | 0.049390552 |
| ACH-000223 | HCC1937_BREAST                | FK-866             | 6914657   | 0.049401857 |

|            |                                   |              |           |             |
|------------|-----------------------------------|--------------|-----------|-------------|
| ACH-000322 | HT144_SKIN                        | paclitaxel   | 36314     | 0.049444808 |
| ACH-000322 | HT144_SKIN                        | pralatrexate | 148121    | 0.049456984 |
| ACH-000138 | CFPAC1_PANCREAS                   | docetaxel    | 148124    | 0.049474062 |
| ACH-000897 | FTC238_THYROID                    | alvespimycin | 5288674   | 0.049544426 |
| ACH-000312 | SKNBE2_AUTONOMIC_GANGLIA          | paclitaxel   | 36314     | 0.049646068 |
| ACH-000138 | CFPAC1_PANCREAS                   | filanesib    | 44224257  | 0.04965417  |
| ACH-000035 | NCIH1650_LUNG                     | filanesib    | 44224257  | 0.049679215 |
| ACH-000493 | SNU423_LIVER                      | temsirolimus | 129009966 | 0.049692681 |
| ACH-000715 | SNU1214_UPPER_AERODIGESTIVE_TRACT | docetaxel    | 148124    | 0.049716109 |
| ACH-000662 | CORL23_LUNG                       | pralatrexate | 148121    | 0.04971807  |
| ACH-000427 | NCIN87_STOMACH                    | filanesib    | 44224257  | 0.049777717 |
| ACH-000771 | BICR56_UPPER_AERODIGESTIVE_TRACT  | LY2606368    | 46700756  | 0.049783041 |
| ACH-000967 | SNUC2A_LARGE_INTESTINE            | alvespimycin | 5288674   | 0.049831488 |
| ACH-000985 | LS411N_LARGE_INTESTINE            | docetaxel    | 148124    | 0.049865672 |
| ACH-000155 | SW1990_PANCREAS                   | docetaxel    | 148124    | 0.04988873  |
| ACH-000609 | SF126_CENTRAL_NERVOUS_SYSTEM      | filanesib    | 44224257  | 0.049917377 |
| ACH-000565 | RCM1_LARGE_INTESTINE              | NVP-AUY922   | 135539077 | 0.049935532 |
| ACH-000587 | NCIH1975_LUNG                     | filanesib    | 44224257  | 0.049947123 |
| ACH-000019 | MCF7_BREAST                       | docetaxel    | 148124    | 0.04999547  |
| ACH-000667 | HCC44_LUNG                        | pralatrexate | 148121    | 0.050005403 |
| ACH-000232 | U251MG_CENTRAL_NERVOUS_SYSTEM     | paclitaxel   | 36314     | 0.050039708 |
| ACH-000549 | SNU1076_UPPER_AERODIGESTIVE_TRACT | FK-866       | 6914657   | 0.050042822 |
| ACH-000738 | GB1_CENTRAL_NERVOUS_SYSTEM        | filanesib    | 44224257  | 0.050065844 |
| ACH-000814 | HS939T_SKIN                       | docetaxel    | 148124    | 0.050087582 |
| ACH-000955 | SNU407_LARGE_INTESTINE            | paclitaxel   | 36314     | 0.050128286 |
| ACH-000235 | PANC0403_PANCREAS                 | ganetespiib  | 135564985 | 0.050129631 |
| ACH-000542 | HEYA8_OVARY                       | paclitaxel   | 36314     | 0.050149686 |
| ACH-000647 | TE1_OESOPHAGUS                    | FK-866       | 6914657   | 0.050167512 |
| ACH-000685 | L33_PANCREAS                      | NVP-AUY922   | 135539077 | 0.050174999 |
| ACH-000749 | DMS273_LUNG                       | ispinesib    | 6851740   | 0.050191847 |
| ACH-000493 | SNU423_LIVER                      | pralatrexate | 148121    | 0.05020135  |
| ACH-000155 | SW1990_PANCREAS                   | filanesib    | 44224257  | 0.050211217 |
| ACH-000308 | EFO21_OVARY                       | NVP-AUY922   | 135539077 | 0.050247242 |
| ACH-000368 | SNU1105_CENTRAL_NERVOUS_SYSTEM    | alvespimycin | 5288674   | 0.050316278 |
| ACH-000332 | YAPC_PANCREAS                     | docetaxel    | 148124    | 0.050374913 |
| ACH-000014 | HS294T_SKIN                       | paclitaxel   | 36314     | 0.050375903 |
| ACH-000235 | PANC0403_PANCREAS                 | NVP-AUY922   | 135539077 | 0.050409839 |
| ACH-000318 | TE10_OESOPHAGUS                   | vindesine    | 40839     | 0.050410812 |
| ACH-000210 | CADOES1_BONE                      | colchicine   | 6167      | 0.050412642 |
| ACH-000587 | NCIH1975_LUNG                     | FK-866       | 6914657   | 0.050464785 |
| ACH-001239 | WM2664_SKIN                       | epothilone-b | 129010071 | 0.050478977 |
| ACH-000164 | PANC1_PANCREAS                    | alvespimycin | 5288674   | 0.050486755 |
| ACH-000827 | WM793_SKIN                        | docetaxel    | 148124    | 0.050585684 |

|            |                                           |              |           |             |
|------------|-------------------------------------------|--------------|-----------|-------------|
| ACH-000161 | CORL105_LUNG                              | alvespimycin | 5288674   | 0.050680348 |
| ACH-000408 | TE5_OESOPHAGUS                            | docetaxel    | 148124    | 0.05073435  |
| ACH-000201 | A204_SOFT_TISSUE                          | ispinesib    | 6851740   | 0.050800639 |
| ACH-000570 | YKG1_CENTRAL_NERVOUS_SYSTEM               | filanesib    | 44224257  | 0.050813673 |
| ACH-000813 | T3M10_LUNG                                | alvespimycin | 5288674   | 0.050835224 |
| ACH-000505 | RKN_SOFT_TISSUE                           | FK-866       | 6914657   | 0.050861104 |
| ACH-000808 | HUH28_BILIARY_TRACT                       | FK-866       | 6914657   | 0.050865809 |
| ACH-000542 | HEYA8_OVARY                               | filanesib    | 44224257  | 0.050872846 |
| ACH-000628 | NCIH596_LUNG                              | paclitaxel   | 36314     | 0.050881932 |
| ACH-000458 | CJM_SKIN                                  | alvespimycin | 5288674   | 0.050886576 |
| ACH-000035 | NCIH1650_LUNG                             | vinblastine  | 13342     | 0.050887074 |
| ACH-000014 | HS294T_SKIN                               | filanesib    | 44224257  | 0.050912056 |
| ACH-001318 | PLCPRF5_LIVER                             | pralatrexate | 148121    | 0.050973689 |
| ACH-000976 | HUCCT1_BILIARY_TRACT                      | filanesib    | 44224257  | 0.050997788 |
| ACH-000593 | BC3C_URINARY_TRACT                        | ganetespib   | 135564985 | 0.051009734 |
| ACH-000941 | HEC1B_ENDOMETRIUM                         | FK-866       | 6914657   | 0.051040901 |
| ACH-000232 | U251MG_CENTRAL_NERVOUS_SYSTEM             | pralatrexate | 148121    | 0.051059148 |
| ACH-000035 | NCIH1650_LUNG                             | NVP-AUY922   | 135539077 | 0.051085594 |
| ACH-000614 | RVH421_SKIN                               | paclitaxel   | 36314     | 0.051086334 |
| ACH-000808 | HUH28_BILIARY_TRACT                       | docetaxel    | 148124    | 0.051144861 |
| ACH-000890 | SW1271_LUNG                               | pralatrexate | 148121    | 0.051150899 |
| ACH-000359 | MG63_BONE                                 | ganetespib   | 135564985 | 0.051266007 |
| ACH-000856 | CAL51_BREAST                              | docetaxel    | 148124    | 0.051277614 |
| ACH-000527 | OVI5E_OVARY                               | filanesib    | 44224257  | 0.051321301 |
| ACH-000813 | T3M10_LUNG                                | ganetespib   | 135564985 | 0.051329506 |
| ACH-000750 | LOXIMV1_SKIN                              | pralatrexate | 148121    | 0.051342437 |
| ACH-000603 | BEN_LUNG                                  | NVP-AUY922   | 135539077 | 0.051363371 |
| ACH-000835 | GCT_SOFT_TISSUE                           | alvespimycin | 5288674   | 0.051384892 |
| ACH-000856 | CAL51_BREAST                              | alvespimycin | 5288674   | 0.051399122 |
| ACH-000846 | FADU_UPPER_AERODIGESTIVE_TRACT            | panobinostat | 6918837   | 0.051404781 |
| ACH-000785 | NCIH2126_LUNG                             | paclitaxel   | 36314     | 0.051423802 |
| ACH-000573 | MDAMB436_BREAST                           | docetaxel    | 148124    | 0.05143585  |
| ACH-000943 | RKO_LARGE_INTESTINE                       | pralatrexate | 148121    | 0.051437988 |
| ACH-000147 | T47D_BREAST                               | alvespimycin | 5288674   | 0.0514639   |
| ACH-000614 | RVH421_SKIN                               | filanesib    | 44224257  | 0.051467249 |
| ACH-000318 | TE10_OESOPHAGUS                           | BNC105       | 24786555  | 0.051472408 |
| ACH-000047 | GCIY_STOMACH                              | pralatrexate | 148121    | 0.051476786 |
| ACH-000603 | BEN_LUNG                                  | alvespimycin | 5288674   | 0.051477668 |
| ACH-000827 | WM793_SKIN                                | filanesib    | 44224257  | 0.051497004 |
| ACH-000880 | AGS_STOMACH                               | filanesib    | 44224257  | 0.051512625 |
| ACH-000651 | SW620_LARGE_INTESTINE                     | pralatrexate | 148121    | 0.051513865 |
| ACH-000837 | NCIH322_LUNG                              | paclitaxel   | 36314     | 0.051576204 |
| ACH-000732 | PECAPJ41CLONED2_UPPER_AERODIGESTIVE_TRACT | pralatrexate | 148121    | 0.051602058 |

|            |                                   |              |           |             |
|------------|-----------------------------------|--------------|-----------|-------------|
| ACH-000814 | HS939T_SKIN                       | FK-866       | 6914657   | 0.051693282 |
| ACH-000553 | SQ1_LUNG                          | pralatrexate | 148121    | 0.051712471 |
| ACH-000421 | SW837_LARGE_INTESTINE             | bortezomib   | 387447    | 0.051753555 |
| ACH-000678 | MKN7_STOMACH                      | NVP-AUY922   | 135539077 | 0.051776033 |
| ACH-000924 | NCIH2172_LUNG                     | paclitaxel   | 36314     | 0.051795212 |
| ACH-000060 | PANC1005_PANCREAS                 | BNC105       | 24786555  | 0.051818757 |
| ACH-000776 | ONS76_CENTRAL_NERVOUS_SYSTEM      | pralatrexate | 148121    | 0.05184299  |
| ACH-000985 | LS411N_LARGE_INTESTINE            | alvespimycin | 5288674   | 0.051867422 |
| ACH-000776 | ONS76_CENTRAL_NERVOUS_SYSTEM      | filanesib    | 44224257  | 0.051897319 |
| ACH-000504 | SNB75_CENTRAL_NERVOUS_SYSTEM      | FK-866       | 6914657   | 0.05190776  |
| ACH-000888 | NCIH1793_LUNG                     | alvespimycin | 5288674   | 0.051912378 |
| ACH-000189 | RCC10RGB_KIDNEY                   | pralatrexate | 148121    | 0.051948995 |
| ACH-000685 | L33_PANCREAS                      | filanesib    | 44224257  | 0.051984757 |
| ACH-000417 | PANC0813_PANCREAS                 | FK-866       | 6914657   | 0.052033521 |
| ACH-000107 | CAPAN2_PANCREAS                   | selinexor    | 71481097  | 0.052048071 |
| ACH-000528 | ABC1_LUNG                         | pralatrexate | 148121    | 0.052064765 |
| ACH-000280 | SNU840_OVARY                      | pralatrexate | 148121    | 0.052069589 |
| ACH-000648 | NCIH28_PLEURA                     | colchicine   | 6167      | 0.052085402 |
| ACH-000970 | SNUC5_LARGE_INTESTINE             | bortezomib   | 387447    | 0.052093844 |
| ACH-000841 | NCIH2087_LUNG                     | NVP-AUY922   | 135539077 | 0.052123734 |
| ACH-000787 | LXF289_LUNG                       | FK-866       | 6914657   | 0.052166054 |
| ACH-000573 | MDAMB436_BREAST                   | NVP-AUY922   | 135539077 | 0.052195327 |
| ACH-000800 | NCIH446_LUNG                      | alvespimycin | 5288674   | 0.052212614 |
| ACH-000842 | SW480_LARGE_INTESTINE             | vindesine    | 40839     | 0.052251057 |
| ACH-000911 | NUGC3_STOMACH                     | tanespimycin | 6505803   | 0.052256668 |
| ACH-000573 | MDAMB436_BREAST                   | ganetespib   | 135564985 | 0.052288681 |
| ACH-000445 | KNS60_CENTRAL_NERVOUS_SYSTEM      | pralatrexate | 148121    | 0.052292675 |
| ACH-000984 | HEC6_ENDOMETRIUM                  | filanesib    | 44224257  | 0.052331297 |
| ACH-001321 | TT_THYROID                        | AZD8330      | 16666708  | 0.052379005 |
| ACH-000860 | NCIH358_LUNG                      | BNC105       | 24786555  | 0.052490551 |
| ACH-000619 | PECAP15_UPPER_AERODIGESTIVE_TRACT | pralatrexate | 148121    | 0.052508109 |
| ACH-000813 | T3M10_LUNG                        | pralatrexate | 148121    | 0.052529272 |
| ACH-000504 | SNB75_CENTRAL_NERVOUS_SYSTEM      | filanesib    | 44224257  | 0.052589151 |
| ACH-000191 | BHT101_THYROID                    | filanesib    | 44224257  | 0.05260396  |
| ACH-000593 | BC3C_URINARY_TRACT                | FK-866       | 6914657   | 0.052633103 |
| ACH-000012 | HCC827_LUNG                       | alvespimycin | 5288674   | 0.052684464 |
| ACH-000082 | G292CLONEA141B1_BONE              | NSC-319726   | 5921672   | 0.052723465 |
| ACH-000496 | NCIH1792_LUNG                     | pralatrexate | 148121    | 0.052747127 |
| ACH-000544 | OE21_OESOPHAGUS                   | MPI-0479605  | 46909588  | 0.052749283 |
| ACH-000808 | HUH28_BILIARY_TRACT               | filanesib    | 44224257  | 0.05279142  |
| ACH-000013 | ONCODG1_OVARY                     | pralatrexate | 148121    | 0.052806894 |
| ACH-000671 | HUH6_LIVER                        | filanesib    | 44224257  | 0.052818672 |
| ACH-000420 | SNU449_LIVER                      | filanesib    | 44224257  | 0.05284604  |

|            |                                  |                |           |             |
|------------|----------------------------------|----------------|-----------|-------------|
| ACH-000132 | JHOS2_OVARY                      | BI-2536        | 11364421  | 0.052858468 |
| ACH-000404 | K029AX_SKIN                      | alvespimycin   | 5288674   | 0.052894823 |
| ACH-000991 | SNU81_LARGE_INTESTINE            | NVP-AUY922     | 135539077 | 0.052902784 |
| ACH-000768 | MDAMB231_BREAST                  | alvespimycin   | 5288674   | 0.052908689 |
| ACH-000397 | TEN_ENDOMETRIUM                  | NVP-AUY922     | 135539077 | 0.05291655  |
| ACH-000228 | BICR31_UPPER_AERODIGESTIVE_TRACT | pralatrexate   | 148121    | 0.05293285  |
| ACH-000811 | SKOV3_OVARY                      | pralatrexate   | 148121    | 0.052952261 |
| ACH-000849 | MDAMB468_BREAST                  | pralatrexate   | 148121    | 0.052962148 |
| ACH-000482 | RERFLCKJ_LUNG                    | pralatrexate   | 148121    | 0.052976842 |
| ACH-000066 | HCC4006_LUNG                     | alvespimycin   | 5288674   | 0.05304375  |
| ACH-000277 | HCC1419_BREAST                   | FK-866         | 6914657   | 0.05307621  |
| ACH-000352 | HCC1428_BREAST                   | bortezomib     | 387447    | 0.053082836 |
| ACH-000717 | COLO680N_OESOPHAGUS              | ganetespi      | 135564985 | 0.053135954 |
| ACH-000599 | PATU8902_PANCREAS                | paclitaxel     | 36314     | 0.053149366 |
| ACH-000450 | MELHO_SKIN                       | pralatrexate   | 148121    | 0.053159353 |
| ACH-000545 | VMCUB1_URINARY_TRACT             | filanesib      | 44224257  | 0.053175276 |
| ACH-000393 | HLF_LIVER                        | elesclomol     | 300471    | 0.0531794   |
| ACH-000027 | GOS3_CENTRAL_NERVOUS_SYSTEM      | docetaxel      | 148124    | 0.053200984 |
| ACH-000632 | HS944T_SKIN                      | crystal-violet | 3468      | 0.053201565 |
| ACH-000138 | CFPAC1_PANCREAS                  | ganetespi      | 135564985 | 0.053219694 |
| ACH-000826 | CAL12T_LUNG                      | alvespimycin   | 5288674   | 0.053248935 |
| ACH-000132 | JHOS2_OVARY                      | filanesib      | 44224257  | 0.053255963 |
| ACH-000572 | G361_SKIN                        | docetaxel      | 148124    | 0.053273841 |
| ACH-000313 | KMRC3_KIDNEY                     | alvespimycin   | 5288674   | 0.053281551 |
| ACH-000997 | HCT15_LARGE_INTESTINE            | JNJ-26481585   | 11538455  | 0.053323932 |
| ACH-000777 | KYSE30_OESOPHAGUS                | pralatrexate   | 148121    | 0.053364568 |
| ACH-000046 | ACHN_KIDNEY                      | docetaxel      | 148124    | 0.053366442 |
| ACH-000133 | HS729_SOFT_TISSUE                | BI-2536        | 11364421  | 0.053383193 |
| ACH-000209 | SNU1079_BILIARY_TRACT            | filanesib      | 44224257  | 0.053396162 |
| ACH-000882 | IGR1_SKIN                        | docetaxel      | 148124    | 0.053396389 |
| ACH-000376 | SF295_CENTRAL_NERVOUS_SYSTEM     | LY2606368      | 46700756  | 0.053423074 |
| ACH-000971 | HCT116_LARGE_INTESTINE           | pralatrexate   | 148121    | 0.053436135 |
| ACH-000332 | YAPC_PANCREAS                    | filanesib      | 44224257  | 0.053453573 |
| ACH-000791 | RERFLCAD1_LUNG                   | filanesib      | 44224257  | 0.053478487 |
| ACH-000826 | CAL12T_LUNG                      | FK-866         | 6914657   | 0.053543143 |
| ACH-000647 | TE1_OESOPHAGUS                   | bortezomib     | 387447    | 0.053562236 |
| ACH-000532 | SNU61_LARGE_INTESTINE            | NVP-AUY922     | 135539077 | 0.053587319 |
| ACH-000147 | T47D_BREAST                      | ganetespi      | 135564985 | 0.053611205 |
| ACH-000191 | BHT101_THYROID                   | docetaxel      | 148124    | 0.053670938 |
| ACH-000141 | SNU308_BILIARY_TRACT             | alvespimycin   | 5288674   | 0.053692908 |
| ACH-000189 | RCC10RGB_KIDNEY                  | filanesib      | 44224257  | 0.053712934 |
| ACH-000562 | HCC78_LUNG                       | paclitaxel     | 36314     | 0.053717858 |
| ACH-000924 | NCIH2172_LUNG                    | pralatrexate   | 148121    | 0.053729049 |

|            |                                 |              |           |             |
|------------|---------------------------------|--------------|-----------|-------------|
| ACH-000603 | BEN_LUNG                        | ganetespi    | 135564985 | 0.053732507 |
| ACH-000573 | MDAMB436_BREAST                 | alvespimycin | 5288674   | 0.053750941 |
| ACH-000408 | TE5_OESOPHAGUS                  | NVP-AUY922   | 135539077 | 0.053836999 |
| ACH-000968 | COLO792_SKIN                    | docetaxel    | 148124    | 0.053842431 |
| ACH-000447 | NCIH2228_LUNG                   | FK-866       | 6914657   | 0.053869737 |
| ACH-000097 | ZR751_BREAST                    | paclitaxel   | 36314     | 0.053956898 |
| ACH-000444 | LU99_LUNG                       | ispinesib    | 6851740   | 0.053966047 |
| ACH-000397 | TEN_ENDOMETRIUM                 | docetaxel    | 148124    | 0.053978264 |
| ACH-000280 | SNU840_OVARY                    | ispinesib    | 6851740   | 0.054122315 |
| ACH-000209 | SNU1079_BILIARY_TRACT           | FK-866       | 6914657   | 0.054148843 |
| ACH-000447 | NCIH2228_LUNG                   | ganetespi    | 135564985 | 0.054166675 |
| ACH-000042 | PANC0203_PANCREAS               | docetaxel    | 148124    | 0.054176409 |
| ACH-000264 | CALU6_LUNG                      | pralatrexate | 148121    | 0.054188115 |
| ACH-000332 | YAPC_PANCREAS                   | ganetespi    | 135564985 | 0.054213078 |
| ACH-000661 | WM1799_SKIN                     | docetaxel    | 148124    | 0.054260011 |
| ACH-000423 | SKMEL3_SKIN                     | bortezomib   | 387447    | 0.054285425 |
| ACH-000097 | ZR751_BREAST                    | NVP-AUY922   | 135539077 | 0.054323601 |
| ACH-000527 | OVISE_OVARY                     | docetaxel    | 148124    | 0.054324437 |
| ACH-000609 | SF126_CENTRAL_NERVOUS_SYSTEM    | alvespimycin | 5288674   | 0.054363945 |
| ACH-000895 | CL34_LARGE_INTESTINE            | docetaxel    | 148124    | 0.0544078   |
| ACH-000643 | HDQP1_BREAST                    | FK-866       | 6914657   | 0.054410408 |
| ACH-000027 | GOS3_CENTRAL_NERVOUS_SYSTEM     | alvespimycin | 5288674   | 0.054470138 |
| ACH-000950 | LOVO_LARGE_INTESTINE            | docetaxel    | 148124    | 0.054478134 |
| ACH-000139 | PANC0327_PANCREAS               | vindesine    | 40839     | 0.05449593  |
| ACH-000913 | ESS1_ENDOMETRIUM                | NVP-AUY922   | 135539077 | 0.054539463 |
| ACH-000685 | L33_PANCREAS                    | FK-866       | 6914657   | 0.054544041 |
| ACH-000603 | BEN_LUNG                        | FK-866       | 6914657   | 0.054551877 |
| ACH-000587 | NCIH1975_LUNG                   | pralatrexate | 148121    | 0.054556639 |
| ACH-000186 | NCIH2444_LUNG                   | BNC105       | 24786555  | 0.054565888 |
| ACH-000308 | EFO21_OVARY                     | ganetespi    | 135564985 | 0.054699137 |
| ACH-000955 | SNU407_LARGE_INTESTINE          | NVP-AUY922   | 135539077 | 0.054721478 |
| ACH-000562 | HCC78_LUNG                      | epothilone-b | 129010071 | 0.054727776 |
| ACH-000500 | SNU46_UPPER_AERODIGESTIVE_TRACT | pralatrexate | 148121    | 0.054737704 |
| ACH-000397 | TEN_ENDOMETRIUM                 | alvespimycin | 5288674   | 0.054828192 |
| ACH-000376 | SF295_CENTRAL_NERVOUS_SYSTEM    | alvespimycin | 5288674   | 0.05483955  |
| ACH-000565 | RCM1_LARGE_INTESTINE            | alvespimycin | 5288674   | 0.054841774 |
| ACH-000060 | PANC1005_PANCREAS               | pralatrexate | 148121    | 0.054845368 |
| ACH-000783 | CAMA1_BREAST                    | paclitaxel   | 36314     | 0.05485401  |
| ACH-000783 | CAMA1_BREAST                    | alvespimycin | 5288674   | 0.054869996 |
| ACH-000895 | CL34_LARGE_INTESTINE            | ganetespi    | 135564985 | 0.054910619 |
| ACH-000318 | TE10_OESOPHAGUS                 | paclitaxel   | 36314     | 0.054922741 |
| ACH-000677 | SW1573_LUNG                     | filanesib    | 44224257  | 0.054940491 |
| ACH-000132 | JHOS2_OVARY                     | docetaxel    | 148124    | 0.054972505 |

|            |                              |                    |           |             |
|------------|------------------------------|--------------------|-----------|-------------|
| ACH-000161 | CORL105_LUNG                 | FK-866             | 6914657   | 0.055103222 |
| ACH-000097 | ZR751_BREAST                 | alvespimycin       | 5288674   | 0.055127407 |
| ACH-000860 | NCIH358_LUNG                 | paclitaxel         | 36314     | 0.055181627 |
| ACH-000911 | NUGC3_STOMACH                | FK-866             | 6914657   | 0.055187712 |
| ACH-000222 | ASPC1_PANCREAS               | alvespimycin       | 5288674   | 0.055209203 |
| ACH-000237 | JHOM1_OVARY                  | ispinesib          | 6851740   | 0.055231494 |
| ACH-000657 | A2780_OVARY                  | rigosertib         | 6918736   | 0.055253553 |
| ACH-000118 | HUPT3_PANCREAS               | filanesib          | 44224257  | 0.055263569 |
| ACH-000164 | PANC1_PANCREAS               | vindesine          | 40839     | 0.055322013 |
| ACH-000479 | KNS81_CENTRAL_NERVOUS_SYSTEM | NVP-AUY922         | 135539077 | 0.055341942 |
| ACH-000959 | SNUC4_LARGE_INTESTINE        | alvespimycin       | 5288674   | 0.055396961 |
| ACH-000447 | NCIH228_LUNG                 | NVP-AUY922         | 135539077 | 0.055434923 |
| ACH-000332 | YAPC_PANCREAS                | NVP-AUY922         | 135539077 | 0.055466458 |
| ACH-000222 | ASPC1_PANCREAS               | NVP-AUY922         | 135539077 | 0.055496678 |
| ACH-000351 | MKN1_STOMACH                 | pralatrexate       | 148121    | 0.055513342 |
| ACH-000808 | HUH28_BILIARY_TRACT          | paclitaxel         | 36314     | 0.055538103 |
| ACH-001075 | NCIH292_LUNG                 | filanesib          | 44224257  | 0.055585293 |
| ACH-000374 | HCC1143_BREAST               | docetaxel          | 148124    | 0.055592902 |
| ACH-000822 | SKMEL24_SKIN                 | alvespimycin       | 5288674   | 0.055605585 |
| ACH-000147 | T47D_BREAST                  | paclitaxel         | 36314     | 0.055646443 |
| ACH-000768 | MDAMB231_BREAST              | docetaxel          | 148124    | 0.055682694 |
| ACH-000647 | TE1_OESOPHAGUS               | filanesib          | 44224257  | 0.055784247 |
| ACH-000880 | AGS_STOMACH                  | pralatrexate       | 148121    | 0.055796281 |
| ACH-000685 | L33_PANCREAS                 | tanespimycin       | 6505803   | 0.055810511 |
| ACH-000609 | SF126_CENTRAL_NERVOUS_SYSTEM | docetaxel          | 148124    | 0.05588968  |
| ACH-000418 | SW1353_BONE                  | docetaxel          | 148124    | 0.055940913 |
| ACH-000875 | NCIH2347_LUNG                | docetaxel          | 148124    | 0.055991335 |
| ACH-000719 | RMGI_OVARY                   | filanesib          | 44224257  | 0.05602597  |
| ACH-000117 | EFM192A_BREAST               | paclitaxel         | 36314     | 0.056026276 |
| ACH-000521 | NCIH2030_LUNG                | pralatrexate       | 148121    | 0.056026587 |
| ACH-000628 | NCIH596_LUNG                 | LY2606368          | 46700756  | 0.056127915 |
| ACH-000941 | HEC1B_ENDOMETRIUM            | NVP-AUY922         | 135539077 | 0.056165674 |
| ACH-000853 | NCIH661_LUNG                 | pralatrexate       | 148121    | 0.056186342 |
| ACH-000776 | ONS76_CENTRAL_NERVOUS_SYSTEM | paclitaxel         | 36314     | 0.056255836 |
| ACH-000898 | SNU719_STOMACH               | docetaxel          | 148124    | 0.056278254 |
| ACH-000950 | LOVO_LARGE_INTESTINE         | bortezomib         | 387447    | 0.056299328 |
| ACH-000359 | MG63_BONE                    | paclitaxel         | 36314     | 0.056311456 |
| ACH-000504 | SNB75_CENTRAL_NERVOUS_SYSTEM | alvespimycin       | 5288674   | 0.056352141 |
| ACH-000868 | HCC1195_LUNG                 | combretastatin-A-4 | 5351344   | 0.056365425 |
| ACH-000359 | MG63_BONE                    | dinaciclub         | 46926350  | 0.056378396 |
| ACH-000997 | HCT15_LARGE_INTESTINE        | NVP-AUY922         | 135539077 | 0.056388907 |
| ACH-000421 | SW837_LARGE_INTESTINE        | vindesine          | 40839     | 0.056408916 |
| ACH-000456 | BCPAP_THYROID                | alvespimycin       | 5288674   | 0.05641752  |

|            |                                    |              |           |             |
|------------|------------------------------------|--------------|-----------|-------------|
| ACH-000244 | DKMG_CENTRAL_NERVOUS_SYSTEM        | FK-866       | 6914657   | 0.056496201 |
| ACH-000329 | CCFSTTG1_CENTRAL_NERVOUS_SYSTEM    | docetaxel    | 148124    | 0.056580369 |
| ACH-000882 | IGR1_SKIN                          | filanesib    | 44224257  | 0.056687763 |
| ACH-000628 | NCIH596_LUNG                       | pralatrexate | 148121    | 0.056697493 |
| ACH-000118 | HUPT3_PANCREAS                     | paclitaxel   | 36314     | 0.05673333  |
| ACH-000836 | YD15_SALIVARY_GLAND                | filanesib    | 44224257  | 0.056736919 |
| ACH-000619 | PECAPJ15_UPPER_AERODIGESTIVE_TRACT | ispinesib    | 6851740   | 0.056789096 |
| ACH-000066 | HCC4006_LUNG                       | filanesib    | 44224257  | 0.056796596 |
| ACH-000632 | HS944T_SKIN                        | tanespimycin | 6505803   | 0.056801436 |
| ACH-000899 | WM88_SKIN                          | alvespimycin | 5288674   | 0.05689335  |
| ACH-000266 | SNU213_PANCREAS                    | taltobulin   | 6918637   | 0.056999469 |
| ACH-000880 | AGS_STOMACH                        | vinblastine  | 13342     | 0.057081274 |
| ACH-000219 | A375_SKIN                          | filanesib    | 44224257  | 0.057104816 |
| ACH-000484 | VMRCRCW_KIDNEY                     | colchicine   | 6167      | 0.057130308 |
| ACH-000679 | OE19_OESOPHAGUS                    | filanesib    | 44224257  | 0.057134232 |
| ACH-000841 | NCIH2087_LUNG                      | BAY-87-2243  | 67377767  | 0.057137045 |
| ACH-000846 | FADU_UPPER_AERODIGESTIVE_TRACT     | litronesib   | 25167017  | 0.057189583 |
| ACH-000307 | PK1_PANCREAS                       | pralatrexate | 148121    | 0.057196814 |
| ACH-000565 | RCM1_LARGE_INTESTINE               | filanesib    | 44224257  | 0.057245134 |
| ACH-000868 | HCC1195_LUNG                       | paclitaxel   | 36314     | 0.057252575 |
| ACH-000471 | LI7_LIVER                          | alvespimycin | 5288674   | 0.057254836 |
| ACH-000278 | COV362_OVARY                       | filanesib    | 44224257  | 0.05726036  |
| ACH-000885 | TOV21G_OVARY                       | rigosertib   | 6918736   | 0.057261266 |
| ACH-000570 | YKG1_CENTRAL_NERVOUS_SYSTEM        | alvespimycin | 5288674   | 0.057266654 |
| ACH-000441 | SH4_SKIN                           | cabazitaxel  | 129009963 | 0.057310195 |
| ACH-000669 | SW900_LUNG                         | filanesib    | 44224257  | 0.057323185 |
| ACH-000416 | NCIH838_LUNG                       | pralatrexate | 148121    | 0.057376904 |
| ACH-000976 | HUCCT1_BILIARY_TRACT               | pralatrexate | 148121    | 0.057388322 |
| ACH-000603 | BEN_LUNG                           | pralatrexate | 148121    | 0.057413931 |
| ACH-000066 | HCC4006_LUNG                       | NVP-AUY922   | 135539077 | 0.05751086  |
| ACH-000669 | SW900_LUNG                         | FK-866       | 6914657   | 0.05751578  |
| ACH-000756 | G11_CENTRAL_NERVOUS_SYSTEM         | tanespimycin | 6505803   | 0.057534806 |
| ACH-000893 | NCIH1651_LUNG                      | selinexor    | 71481097  | 0.057559934 |
| ACH-000397 | TEN_ENDOMETRIUM                    | ganetespi    | 135564985 | 0.057567042 |
| ACH-000054 | HT1080_SOFT_TISSUE                 | pralatrexate | 148121    | 0.057584004 |
| ACH-000849 | MDAMB468_BREAST                    | ganetespi    | 135564985 | 0.057643521 |
| ACH-000678 | MKN7_STOMACH                       | filanesib    | 44224257  | 0.057647285 |
| ACH-000308 | EFO21_OVARY                        | paclitaxel   | 36314     | 0.057711684 |
| ACH-000685 | L33_PANCREAS                       | paclitaxel   | 36314     | 0.057743792 |
| ACH-000347 | QGP1_PANCREAS                      | alvespimycin | 5288674   | 0.057754955 |
| ACH-000972 | HEC151_ENDOMETRIUM                 | pralatrexate | 148121    | 0.057765878 |
| ACH-000765 | WM983B_SKIN                        | tanespimycin | 6505803   | 0.057783382 |
| ACH-000305 | ECG110_OESOPHAGUS                  | ganetespi    | 135564985 | 0.057849401 |

|            |                                   |                    |           |             |
|------------|-----------------------------------|--------------------|-----------|-------------|
| ACH-000985 | LS411N_LARGE_INTESTINE            | filanesib          | 44224257  | 0.057875375 |
| ACH-000738 | GB1_CENTRAL_NERVOUS_SYSTEM        | NVP-AUY922         | 135539077 | 0.057903709 |
| ACH-000222 | ASPC1_PANCREAS                    | filanesib          | 44224257  | 0.057915468 |
| ACH-000966 | IGROV1_OVARY                      | tanespimycin       | 6505803   | 0.057922884 |
| ACH-000719 | RMGI_OVARY                        | alvespimycin       | 5288674   | 0.057946783 |
| ACH-000481 | NCIH2170_LUNG                     | pralatrexate       | 148121    | 0.05800549  |
| ACH-000505 | RKN_SOFT_TISSUE                   | MPI-0479605        | 46909588  | 0.058024031 |
| ACH-000846 | FADU_UPPER_AERODIGESTIVE_TRACT    | ispinesib          | 6851740   | 0.058028235 |
| ACH-000967 | SNUC2A_LARGE_INTESTINE            | paclitaxel         | 36314     | 0.058036302 |
| ACH-000423 | SKMEL3_SKIN                       | ganetespi          | 135564985 | 0.058040259 |
| ACH-000288 | BT549_BREAST                      | temsirolimus       | 129009966 | 0.058088042 |
| ACH-000985 | LS411N_LARGE_INTESTINE            | paclitaxel         | 36314     | 0.058158357 |
| ACH-000913 | ESS1_ENDOMETRIUM                  | JNJ-26481585       | 11538455  | 0.058189544 |
| ACH-000787 | LXF289_LUNG                       | vincristine        | 5388993   | 0.058248936 |
| ACH-001318 | PLCPRF5_LIVER                     | elesclomol         | 300471    | 0.058278755 |
| ACH-000704 | OAW42_OVARY                       | NVP-AUY922         | 135539077 | 0.058289844 |
| ACH-000936 | EFO27_OVARY                       | bortezomib         | 387447    | 0.058306423 |
| ACH-000787 | LXF289_LUNG                       | combretastatin-A-4 | 5351344   | 0.058310748 |
| ACH-000132 | JHOS2_OVARY                       | alvespimycin       | 5288674   | 0.058312489 |
| ACH-000565 | RCM1_LARGE_INTESTINE              | docetaxel          | 148124    | 0.058337849 |
| ACH-000468 | PK45H_PANCREAS                    | filanesib          | 44224257  | 0.058344643 |
| ACH-000447 | NCIH2228_LUNG                     | alvespimycin       | 5288674   | 0.058348415 |
| ACH-000178 | HS766T_PANCREAS                   | alvespimycin       | 5288674   | 0.058365466 |
| ACH-000437 | SW1088_CENTRAL_NERVOUS_SYSTEM     | pralatrexate       | 148121    | 0.058411778 |
| ACH-000189 | RCC10RGB_KIDNEY                   | alvespimycin       | 5288674   | 0.058426599 |
| ACH-000842 | SW480_LARGE_INTESTINE             | NVP-AUY922         | 135539077 | 0.058428763 |
| ACH-000814 | HS939T_SKIN                       | BNC105             | 24786555  | 0.058440074 |
| ACH-000897 | FTC238_THYROID                    | pralatrexate       | 148121    | 0.058452074 |
| ACH-000573 | MDAMB436_BREAST                   | paclitaxel         | 36314     | 0.05847063  |
| ACH-000880 | AGS_STOMACH                       | LY2606368          | 46700756  | 0.058473444 |
| ACH-000805 | COLO679_SKIN                      | pralatrexate       | 148121    | 0.058507709 |
| ACH-000423 | SKMEL3_SKIN                       | docetaxel          | 148124    | 0.058556828 |
| ACH-000476 | JHH4_LIVER                        | filanesib          | 44224257  | 0.058564754 |
| ACH-000661 | WM1799_SKIN                       | filanesib          | 44224257  | 0.058580409 |
| ACH-000046 | ACHN_KIDNEY                       | filanesib          | 44224257  | 0.058684038 |
| ACH-000153 | NCIH2052_PLEURA                   | filanesib          | 44224257  | 0.058686955 |
| ACH-000868 | HCC1195_LUNG                      | BNC105             | 24786555  | 0.058716948 |
| ACH-000456 | BCPAP_THYROID                     | ispinesib          | 6851740   | 0.05872973  |
| ACH-000715 | SNU1214_UPPER_AERODIGESTIVE_TRACT | paclitaxel         | 36314     | 0.058800483 |
| ACH-000990 | HEC108_ENDOMETRIUM                | ganetespi          | 135564985 | 0.058810337 |
| ACH-000832 | CAL27_UPPER_AERODIGESTIVE_TRACT   | pralatrexate       | 148121    | 0.058817785 |
| ACH-000159 | OSRC2_KIDNEY                      | bortezomib         | 387447    | 0.058882785 |
| ACH-000868 | HCC1195_LUNG                      | vinblastine        | 13342     | 0.058887105 |

|            |                                   |              |           |             |
|------------|-----------------------------------|--------------|-----------|-------------|
| ACH-000627 | LCLC103H_LUNG                     | elesclomol   | 300471    | 0.058916439 |
| ACH-000488 | TE11_OESOPHAGUS                   | pralatrexate | 148121    | 0.058939184 |
| ACH-000421 | SW837_LARGE_INTESTINE             | filanesib    | 44224257  | 0.058951813 |
| ACH-000019 | MCF7_BREAST                       | NVP-AUY922   | 135539077 | 0.058991525 |
| ACH-000231 | KALS1_CENTRAL_NERVOUS_SYSTEM      | pralatrexate | 148121    | 0.05900318  |
| ACH-000903 | FTC133_THYROID                    | docetaxel    | 148124    | 0.059013869 |
| ACH-000517 | SNU410_PANCREAS                   | alvespimycin | 5288674   | 0.059122604 |
| ACH-000418 | SW1353_BONE                       | ganetespiib  | 135564985 | 0.059202792 |
| ACH-000329 | CCFSTTG1_CENTRAL_NERVOUS_SYSTEM   | FK-866       | 6914657   | 0.059211278 |
| ACH-000679 | OE19_OESOPHAGUS                   | docetaxel    | 148124    | 0.059216653 |
| ACH-000924 | NCIH2172_LUNG                     | dinacilib    | 46926350  | 0.059240315 |
| ACH-000147 | T47D_BREAST                       | pralatrexate | 148121    | 0.059260603 |
| ACH-000954 | HEC1A_ENDOMETRIUM                 | ispinesib    | 6851740   | 0.059262397 |
| ACH-000895 | CL34_LARGE_INTESTINE              | NVP-AUY922   | 135539077 | 0.05932031  |
| ACH-000191 | BHT101_THYROID                    | alvespimycin | 5288674   | 0.059332401 |
| ACH-000579 | UACC257_SKIN                      | FK-866       | 6914657   | 0.059342034 |
| ACH-000717 | COLO680N_OESOPHAGUS               | pralatrexate | 148121    | 0.059383449 |
| ACH-000562 | HCC78_LUNG                        | pralatrexate | 148121    | 0.059388503 |
| ACH-000161 | CORL105_LUNG                      | NVP-AUY922   | 135539077 | 0.059406837 |
| ACH-000347 | QGP1_PANCREAS                     | cabazitaxel  | 129009963 | 0.059417444 |
| ACH-000505 | RKN_SOFT_TISSUE                   | ganetespiib  | 135564985 | 0.05947078  |
| ACH-000309 | SKLU1_LUNG                        | FK-866       | 6914657   | 0.059514838 |
| ACH-000652 | SUIT2_PANCREAS                    | ganetespiib  | 135564985 | 0.059521587 |
| ACH-000019 | MCF7_BREAST                       | paclitaxel   | 36314     | 0.059528425 |
| ACH-000814 | HS939T_SKIN                       | paclitaxel   | 36314     | 0.059635752 |
| ACH-000331 | ISTMES2_PLEURA                    | colchicine   | 6167      | 0.059717935 |
| ACH-000472 | HSC2_UPPER_AERODIGESTIVE_TRACT    | pralatrexate | 148121    | 0.059740042 |
| ACH-000781 | NCIH2023_LUNG                     | NVP-AUY922   | 135539077 | 0.059805542 |
| ACH-000302 | SNU1077_ENDOMETRIUM               | NSC-319726   | 5921672   | 0.059870846 |
| ACH-000359 | MG63_BONE                         | BNC105       | 24786555  | 0.059906069 |
| ACH-000479 | KNS81_CENTRAL_NERVOUS_SYSTEM      | alvespimycin | 5288674   | 0.059910334 |
| ACH-000694 | TE9_OESOPHAGUS                    | pralatrexate | 148121    | 0.059914351 |
| ACH-000663 | OVTOKO_OVARY                      | filanesib    | 44224257  | 0.059980878 |
| ACH-000678 | MKN7_STOMACH                      | paclitaxel   | 36314     | 0.059990023 |
| ACH-000566 | SW1710_URINARY_TRACT              | pralatrexate | 148121    | 0.06005374  |
| ACH-000832 | CAL27_UPPER_AERODIGESTIVE_TRACT   | tanespimycin | 6505803   | 0.060074153 |
| ACH-000841 | NCIH2087_LUNG                     | tanespimycin | 6505803   | 0.060137728 |
| ACH-000493 | SNU423_LIVER                      | everolimus   | 6442177   | 0.060146362 |
| ACH-000812 | COLO783_SKIN                      | pralatrexate | 148121    | 0.060219375 |
| ACH-000888 | NCIH1793_LUNG                     | NVP-AUY922   | 135539077 | 0.06023672  |
| ACH-000788 | A2058_SKIN                        | pralatrexate | 148121    | 0.060295646 |
| ACH-000791 | RERFLCAD1_LUNG                    | FK-866       | 6914657   | 0.060343615 |
| ACH-000549 | SNU1076_UPPER_AERODIGESTIVE_TRACT | LY2606368    | 46700756  | 0.060395569 |

|            |                              |              |           |             |
|------------|------------------------------|--------------|-----------|-------------|
| ACH-000117 | EFM192A_BREAST               | filanesib    | 44224257  | 0.060438209 |
| ACH-000650 | IGR37_SKIN                   | pralatrexate | 148121    | 0.060469164 |
| ACH-000582 | COLO741_SKIN                 | pralatrexate | 148121    | 0.060506077 |
| ACH-000133 | HS729_SOFT_TISSUE            | pralatrexate | 148121    | 0.060581433 |
| ACH-000316 | SNU886_LIVER                 | pralatrexate | 148121    | 0.060627166 |
| ACH-000502 | TCCPAN2_PANCREAS             | FK-866       | 6914657   | 0.060659619 |
| ACH-000997 | HCT15_LARGE_INTESTINE        | alvespimycin | 5288674   | 0.060701748 |
| ACH-000244 | DKMG_CENTRAL_NERVOUS_SYSTEM  | docetaxel    | 148124    | 0.060718586 |
| ACH-000456 | BCPAP_THYROID                | pralatrexate | 148121    | 0.060823608 |
| ACH-000019 | MCF7_BREAST                  | clesclomol   | 300471    | 0.060853127 |
| ACH-000976 | HUCCT1_BILIARY_TRACT         | paclitaxel   | 36314     | 0.060882288 |
| ACH-000344 | SNU668_STOMACH               | FK-866       | 6914657   | 0.060923771 |
| ACH-000091 | OV56_OVARY                   | litronesib   | 25167017  | 0.060950814 |
| ACH-000647 | TE1_OESOPHAGUS               | alvespimycin | 5288674   | 0.060957352 |
| ACH-000374 | HCC1143_BREAST               | NVP-AUY922   | 135539077 | 0.061022188 |
| ACH-000681 | A549_LUNG                    | docetaxel    | 148124    | 0.061027031 |
| ACH-000880 | AGS_STOMACH                  | BNC105       | 24786555  | 0.061077228 |
| ACH-000255 | LMSU_STOMACH                 | pralatrexate | 148121    | 0.061120175 |
| ACH-000219 | A375_SKIN                    | alvespimycin | 5288674   | 0.061137742 |
| ACH-000792 | BFTC909_KIDNEY               | paclitaxel   | 36314     | 0.061141247 |
| ACH-000384 | SW780_URINARY_TRACT          | FK-866       | 6914657   | 0.061156205 |
| ACH-000102 | GMS10_CENTRAL_NERVOUS_SYSTEM | filanesib    | 44224257  | 0.061159889 |
| ACH-000397 | TEN_ENDOMETRIUM              | filanesib    | 44224257  | 0.061274153 |
| ACH-000335 | MSTO211H_PLEURA              | tanespimycin | 6505803   | 0.061313622 |
| ACH-000957 | LS180_LARGE_INTESTINE        | alvespimycin | 5288674   | 0.061328197 |
| ACH-000479 | KNS81_CENTRAL_NERVOUS_SYSTEM | docetaxel    | 148124    | 0.061348229 |
| ACH-000974 | SNGM_ENDOMETRIUM             | pralatrexate | 148121    | 0.06135373  |
| ACH-000351 | MKN1_STOMACH                 | ispinesib    | 6851740   | 0.061354217 |
| ACH-000408 | TE5_OESOPHAGUS               | vindesine    | 40839     | 0.061357042 |
| ACH-000008 | A101D_SKIN                   | ganetespiib  | 135564985 | 0.06137723  |
| ACH-000417 | PANC0813_PANCREAS            | ganetespiib  | 135564985 | 0.061384051 |
| ACH-000420 | SNU449_LIVER                 | NVP-AUY922   | 135539077 | 0.061388436 |
| ACH-000159 | OSRC2_KIDNEY                 | FK-866       | 6914657   | 0.061471061 |
| ACH-000704 | OAW42_OVARY                  | alvespimycin | 5288674   | 0.061513531 |
| ACH-000991 | SNU81_LARGE_INTESTINE        | ganetespiib  | 135564985 | 0.061517753 |
| ACH-000542 | HEYA8_OVARY                  | pralatrexate | 148121    | 0.061545206 |
| ACH-000270 | HPAC_PANCREAS                | NVP-AUY922   | 135539077 | 0.061548349 |
| ACH-000758 | MKN74_STOMACH                | taltobulin   | 6918637   | 0.061618287 |
| ACH-000189 | RCC10RGB_KIDNEY              | dinaciclib   | 46926350  | 0.061626882 |
| ACH-000343 | NCIH522_LUNG                 | NVP-AUY922   | 135539077 | 0.061647894 |
| ACH-000527 | OVISE_OVARY                  | alvespimycin | 5288674   | 0.061661111 |
| ACH-000305 | ECGH10_OESOPHAGUS            | filanesib    | 44224257  | 0.061744212 |
| ACH-000814 | HS939T_SKIN                  | BI-2536      | 11364421  | 0.061809911 |

|            |                                      |              |           |             |
|------------|--------------------------------------|--------------|-----------|-------------|
| ACH-000813 | T3M10_LUNG                           | piperazine   | 4837      | 0.061834802 |
| ACH-000827 | WM793_SKIN                           | paclitaxel   | 36314     | 0.061878468 |
| ACH-000826 | CAL12T_LUNG                          | docetaxel    | 148124    | 0.061885729 |
| ACH-000191 | BHT101_THYROID                       | pralatrexate | 148121    | 0.061892049 |
| ACH-000495 | TUHR4TKB_KIDNEY                      | FK-866       | 6914657   | 0.061968186 |
| ACH-000643 | HDQP1_BREAST                         | filanesib    | 44224257  | 0.062047647 |
| ACH-000833 | RH30_SOFT_TISSUE                     | pralatrexate | 148121    | 0.062051702 |
| ACH-000648 | NCIH28_PLEURA                        | alvespimycin | 5288674   | 0.062059889 |
| ACH-000332 | YAPC_PANCREAS                        | paclitaxel   | 36314     | 0.062177716 |
| ACH-000776 | ONS76_CENTRAL_NERVOUS_SYSTEM         | tanespimycin | 6505803   | 0.062229256 |
| ACH-000936 | EFO27_OVARY                          | alvespimycin | 5288674   | 0.06228192  |
| ACH-000047 | GCIY_STOMACH                         | tanespimycin | 6505803   | 0.062285027 |
| ACH-000393 | HLF_LIVER                            | tanespimycin | 6505803   | 0.062341844 |
| ACH-000425 | UACC62_SKIN                          | ispinesib    | 6851740   | 0.062454685 |
| ACH-000847 | HGC27_STOMACH                        | ispinesib    | 6851740   | 0.062489815 |
| ACH-000985 | LS411N_LARGE_INTESTINE               | FK-866       | 6914657   | 0.062595407 |
| ACH-000132 | JHOS2_OVARY                          | bortezomib   | 387447    | 0.062609663 |
| ACH-000132 | JHOS2_OVARY                          | NVP-AUY922   | 135539077 | 0.062620429 |
| ACH-000495 | TUHR4TKB_KIDNEY                      | filanesib    | 44224257  | 0.062633001 |
| ACH-000364 | U2OS_BONE                            | floxuridine  | 5702211   | 0.062657228 |
| ACH-000374 | HCC1143_BREAST                       | filanesib    | 44224257  | 0.062660044 |
| ACH-000042 | PANC0203_PANCREAS                    | paclitaxel   | 36314     | 0.062704084 |
| ACH-000082 | G292CLONEA141B1_BONE                 | docetaxel    | 148124    | 0.062850863 |
| ACH-000117 | EFM192A_BREAST                       | docetaxel    | 148124    | 0.06294448  |
| ACH-000738 | GB1_CENTRAL_NERVOUS_SYSTEM           | pralatrexate | 148121    | 0.062947052 |
| ACH-000685 | L33_PANCREAS                         | dinaciclib   | 46926350  | 0.062966411 |
| ACH-000417 | PANC0813_PANCREAS                    | paclitaxel   | 36314     | 0.06298559  |
| ACH-000423 | SKMEL3_SKIN                          | NVP-AUY922   | 135539077 | 0.063040623 |
| ACH-000277 | HCC1419_BREAST                       | bortezomib   | 387447    | 0.06305123  |
| ACH-000868 | HCC1195_LUNG                         | alvespimycin | 5288674   | 0.063092501 |
| ACH-000572 | G361_SKIN                            | NVP-AUY922   | 135539077 | 0.063095979 |
| ACH-000368 | SNU1105_CENTRAL_NERVOUS_SYSTEM       | pralatrexate | 148121    | 0.063106439 |
| ACH-000768 | MDAMB231_BREAST                      | BI-2536      | 11364421  | 0.063144878 |
| ACH-000219 | A375_SKIN                            | pralatrexate | 148121    | 0.063166496 |
| ACH-000842 | SW480_LARGE_INTESTINE                | vinblastine  | 13342     | 0.063171033 |
| ACH-000792 | BFTC909_KIDNEY                       | docetaxel    | 148124    | 0.06317124  |
| ACH-000417 | PANC0813_PANCREAS                    | pralatrexate | 148121    | 0.063182248 |
| ACH-000425 | UACC62_SKIN                          | trametinib   | 11707110  | 0.063189984 |
| ACH-000421 | SW837_LARGE_INTESTINE                | NVP-AUY922   | 135539077 | 0.063202032 |
| ACH-000479 | KNS81_CENTRAL_NERVOUS_SYSTEM         | filanesib    | 44224257  | 0.063294128 |
| ACH-000308 | EFO21_OVARY                          | pralatrexate | 148121    | 0.063341372 |
| ACH-000207 | DETROIT562_UPPER_AERODIGESTIVE_TRACT | pralatrexate | 148121    | 0.063353314 |
| ACH-000941 | HEC1B_ENDOMETRIUM                    | ganetespib   | 135564985 | 0.063373001 |

|            |                                   |                  |           |             |
|------------|-----------------------------------|------------------|-----------|-------------|
| ACH-000572 | G361_SKIN                         | paclitaxel       | 36314     | 0.063406274 |
| ACH-000847 | HGC27_STOMACH                     | temoporfin       | 60751     | 0.063421552 |
| ACH-000856 | CAL51_BREAST                      | filanesib        | 44224257  | 0.063548913 |
| ACH-000296 | OUMS23_LARGE_INTESTINE            | docetaxel        | 148124    | 0.063554334 |
| ACH-001321 | TT_THYROID                        | LY2606368        | 46700756  | 0.063646528 |
| ACH-000736 | SNU601_STOMACH                    | tanespimycin     | 6505803   | 0.063678118 |
| ACH-000549 | SNU1076_UPPER_AERODIGESTIVE_TRACT | tanespimycin     | 6505803   | 0.06369653  |
| ACH-000155 | SW1990_PANCREAS                   | pralatrexate     | 148121    | 0.063721188 |
| ACH-000097 | ZR751_BREAST                      | bortezomib       | 387447    | 0.063736934 |
| ACH-000188 | SCC25_UPPER_AERODIGESTIVE_TRACT   | pralatrexate     | 148121    | 0.063823633 |
| ACH-000384 | SW780_URINARY_TRACT               | alvespimycin     | 5288674   | 0.063827869 |
| ACH-000648 | NCIH28_PLEURA                     | ganetespiib      | 135564985 | 0.06384156  |
| ACH-000270 | HPAC_PANCREAS                     | FK-866           | 6914657   | 0.063877481 |
| ACH-000404 | K029AX_SKIN                       | docetaxel        | 148124    | 0.063877716 |
| ACH-000352 | HCC1428_BREAST                    | epothilone-b     | 129010071 | 0.063906367 |
| ACH-000744 | NCIH623_LUNG                      | ingenol-mebutate | 6918670   | 0.063952135 |
| ACH-000603 | BEN_LUNG                          | docetaxel        | 148124    | 0.063957292 |
| ACH-000783 | CAMA1_BREAST                      | docetaxel        | 148124    | 0.063997204 |
| ACH-000768 | MDAMB231_BREAST                   | paclitaxel       | 36314     | 0.064072792 |
| ACH-000955 | SNU407_LARGE_INTESTINE            | ganetespiib      | 135564985 | 0.064092313 |
| ACH-000885 | TOV21G_OVARY                      | litronesib       | 25167017  | 0.064095496 |
| ACH-000771 | BICR56_UPPER_AERODIGESTIVE_TRACT  | docetaxel        | 148124    | 0.064110135 |
| ACH-000572 | G361_SKIN                         | filanesib        | 44224257  | 0.064129805 |
| ACH-000990 | HEC108_ENDOMETRIUM                | pralatrexate     | 148121    | 0.064164229 |
| ACH-000278 | COV362_OVARY                      | pralatrexate     | 148121    | 0.064196814 |
| ACH-000270 | HPAC_PANCREAS                     | cabazitaxel      | 129009963 | 0.064236649 |
| ACH-000678 | MKN7_STOMACH                      | ganetespiib      | 135564985 | 0.064255435 |
| ACH-000990 | HEC108_ENDOMETRIUM                | docetaxel        | 148124    | 0.06426663  |
| ACH-000994 | HEC59_ENDOMETRIUM                 | tanespimycin     | 6505803   | 0.064291719 |
| ACH-000837 | NCIH322_LUNG                      | pralatrexate     | 148121    | 0.064300723 |
| ACH-000401 | COLO800_SKIN                      | paclitaxel       | 36314     | 0.064356328 |
| ACH-000504 | SNB75_CENTRAL_NERVOUS_SYSTEM      | NVP-AUY922       | 135539077 | 0.064387918 |
| ACH-000222 | ASPC1_PANCREAS                    | docetaxel        | 148124    | 0.064403631 |
| ACH-000117 | EFM192A_BREAST                    | NVP-AUY922       | 135539077 | 0.064457213 |
| ACH-000814 | HS939T_SKIN                       | pralatrexate     | 148121    | 0.064476448 |
| ACH-000087 | SKES1_BONE                        | alvespimycin     | 5288674   | 0.064480552 |
| ACH-000936 | EFO27_OVARY                       | docetaxel        | 148124    | 0.064518591 |
| ACH-000138 | CFPAC1_PANCREAS                   | pralatrexate     | 148121    | 0.064532692 |
| ACH-000062 | RERFLCMS_LUNG                     | tanespimycin     | 6505803   | 0.064533316 |
| ACH-000882 | IGR1_SKIN                         | NVP-AUY922       | 135539077 | 0.064573157 |
| ACH-000882 | IGR1_SKIN                         | ganetespiib      | 135564985 | 0.064612078 |
| ACH-000270 | HPAC_PANCREAS                     | epothilone-b     | 129010071 | 0.064615201 |
| ACH-000457 | CAL54_KIDNEY                      | taltobulin       | 6918637   | 0.064636053 |

|            |                              |              |           |             |
|------------|------------------------------|--------------|-----------|-------------|
| ACH-000869 | NCIH1568_LUNG                | tanespimycin | 6505803   | 0.064641858 |
| ACH-000842 | SW480_LARGE_INTESTINE        | FK-866       | 6914657   | 0.064649717 |
| ACH-000791 | RERFLCAD1_LUNG               | tanespimycin | 6505803   | 0.06466745  |
| ACH-000833 | RH30_SOFT_TISSUE             | tanespimycin | 6505803   | 0.064671114 |
| ACH-000433 | CAKI1_KIDNEY                 | docetaxel    | 148124    | 0.064687048 |
| ACH-000967 | SNUC2A_LARGE_INTESTINE       | NVP-AUY922   | 135539077 | 0.064706051 |
| ACH-000092 | NCIH2452_PLEURA              | FK-866       | 6914657   | 0.064730193 |
| ACH-000479 | KNS81_CENTRAL_NERVOUS_SYSTEM | ganetespiib  | 135564985 | 0.06474342  |
| ACH-000454 | HCC95_LUNG                   | filanesib    | 44224257  | 0.064880024 |
| ACH-000996 | HEC251_ENDOMETRIUM           | pralatrexate | 148121    | 0.064895403 |
| ACH-000774 | RERFLCAD2_LUNG               | alvespimycin | 5288674   | 0.064928415 |
| ACH-000421 | SW837_LARGE_INTESTINE        | pralatrexate | 148121    | 0.064987612 |
| ACH-000945 | NCIH650_LUNG                 | ispinesib    | 6851740   | 0.06499345  |
| ACH-000212 | CAL120_BREAST                | pralatrexate | 148121    | 0.065038072 |
| ACH-000842 | SW480_LARGE_INTESTINE        | ganetespiib  | 135564985 | 0.065043868 |
| ACH-000161 | CORL105_LUNG                 | ganetespiib  | 135564985 | 0.065053084 |
| ACH-000277 | HCC1419_BREAST               | docetaxel    | 148124    | 0.065066862 |
| ACH-000669 | SW900_LUNG                   | paclitaxel   | 36314     | 0.065091691 |
| ACH-000138 | CFPAC1_PANCREAS              | paclitaxel   | 36314     | 0.065122961 |
| ACH-000376 | SF295_CENTRAL_NERVOUS_SYSTEM | AZD8330      | 16666708  | 0.06514345  |
| ACH-000781 | NCIH2023_LUNG                | ganetespiib  | 135564985 | 0.065147663 |
| ACH-000826 | CAL12T_LUNG                  | paclitaxel   | 36314     | 0.065181547 |
| ACH-000421 | SW837_LARGE_INTESTINE        | FK-866       | 6914657   | 0.065246701 |
| ACH-000765 | WM983B_SKIN                  | BNC105       | 24786555  | 0.065246845 |
| ACH-000389 | H4_CENTRAL_NERVOUS_SYSTEM    | raltitrexed  | 135400182 | 0.065277077 |
| ACH-000841 | NCIH2087_LUNG                | pralatrexate | 148121    | 0.065312332 |
| ACH-000107 | CAPAN2_PANCREAS              | vindesine    | 40839     | 0.065392615 |
| ACH-000917 | TE4_OESOPHAGUS               | BNC105       | 24786555  | 0.065403952 |
| ACH-000280 | SNU840_OVARY                 | rigosertib   | 6918736   | 0.065472014 |
| ACH-000186 | NCIH2444_LUNG                | pralatrexate | 148121    | 0.065518752 |
| ACH-000895 | CL34_LARGE_INTESTINE         | pralatrexate | 148121    | 0.06555033  |
| ACH-000352 | HCC1428_BREAST               | LY2606368    | 46700756  | 0.065584975 |
| ACH-000141 | SNU308_BILIARY_TRACT         | carfilzomib  | 11556711  | 0.065593593 |
| ACH-000625 | HEP3B217_LIVER               | colchicine   | 6167      | 0.06560283  |
| ACH-000803 | COLO668_LUNG                 | docetaxel    | 148124    | 0.065644358 |
| ACH-000667 | HCC44_LUNG                   | ispinesib    | 6851740   | 0.065663736 |
| ACH-000719 | RMGI_OVARY                   | paclitaxel   | 36314     | 0.065682051 |
| ACH-000401 | COLO800_SKIN                 | filanesib    | 44224257  | 0.065685236 |
| ACH-000418 | SW1353_BONE                  | paclitaxel   | 36314     | 0.06570541  |
| ACH-000587 | NCIH1975_LUNG                | panobinostat | 6918837   | 0.065849799 |
| ACH-000582 | COLO741_SKIN                 | tanespimycin | 6505803   | 0.065855781 |
| ACH-000582 | COLO741_SKIN                 | elesclomol   | 300471    | 0.065876463 |
| ACH-000648 | NCIH28_PLEURA                | AZD8330      | 16666708  | 0.065888619 |

|            |                                |              |           |             |
|------------|--------------------------------|--------------|-----------|-------------|
| ACH-000768 | MDAMB231_BREAST                | pralatrexate | 148121    | 0.065916051 |
| ACH-000352 | HCC1428_BREAST                 | FK-866       | 6914657   | 0.066004296 |
| ACH-000762 | YD38_UPPER_AERODIGESTIVE_TRACT | tanespimycin | 6505803   | 0.066074099 |
| ACH-000280 | SNU840_OVARY                   | litronesib   | 25167017  | 0.066106704 |
| ACH-000244 | DKMG_CENTRAL_NERVOUS_SYSTEM    | paclitaxel   | 36314     | 0.066125371 |
| ACH-000748 | SJSA1_BONE                     | alvespimycin | 5288674   | 0.066204589 |
| ACH-000066 | HCC4006_LUNG                   | ganetespi    | 135564985 | 0.066219298 |
| ACH-000364 | U2OS_BONE                      | ispinesib    | 6851740   | 0.066232771 |
| ACH-000561 | TT_OESOPHAGUS                  | tanespimycin | 6505803   | 0.066243192 |
| ACH-000625 | HEP3B217_LIVER                 | pralatrexate | 148121    | 0.066271099 |
| ACH-000671 | HUH6_LIVER                     | selinexor    | 71481097  | 0.066294329 |
| ACH-000097 | ZR751_BREAST                   | pralatrexate | 148121    | 0.066354245 |
| ACH-000950 | LOVO_LARGE_INTESTINE           | tanespimycin | 6505803   | 0.066374458 |
| ACH-000570 | YKG1_CENTRAL_NERVOUS_SYSTEM    | ispinesib    | 6851740   | 0.066383122 |
| ACH-000092 | NCIH2452_PLEURA                | bortezomib   | 387447    | 0.066410984 |
| ACH-000669 | SW900_LUNG                     | NVP-AUY922   | 135539077 | 0.066505306 |
| ACH-000018 | T24_URINARY_TRACT              | alvespimycin | 5288674   | 0.066579416 |
| ACH-000332 | YAPC_PANCREAS                  | BNC105       | 24786555  | 0.066587992 |
| ACH-000781 | NCIH2023_LUNG                  | FK-866       | 6914657   | 0.066589075 |
| ACH-000679 | OE19_OESOPHAGUS                | NVP-AUY922   | 135539077 | 0.066619835 |
| ACH-001318 | PLCPRF5_LIVER                  | rigosertib   | 6918736   | 0.066633494 |
| ACH-000441 | SH4_SKIN                       | docetaxel    | 148124    | 0.066803672 |
| ACH-000092 | NCIH2452_PLEURA                | docetaxel    | 148124    | 0.066861584 |
| ACH-000996 | HEC251_ENDOMETRIUM             | tanespimycin | 6505803   | 0.066884159 |
| ACH-000502 | TCCPAN2_PANCREAS               | vinblastine  | 13342     | 0.066932741 |
| ACH-000765 | WM983B_SKIN                    | vinblastine  | 13342     | 0.066940094 |
| ACH-000027 | GOS3_CENTRAL_NERVOUS_SYSTEM    | paclitaxel   | 36314     | 0.066959066 |
| ACH-000266 | SNU213_PANCREAS                | colchicine   | 6167      | 0.066962323 |
| ACH-000219 | A375_SKIN                      | docetaxel    | 148124    | 0.067001162 |
| ACH-000107 | CAPAN2_PANCREAS                | docetaxel    | 148124    | 0.067011967 |
| ACH-000950 | LOVO_LARGE_INTESTINE           | pralatrexate | 148121    | 0.067022263 |
| ACH-000176 | LOUNH91_LUNG                   | ganetespi    | 135564985 | 0.067164045 |
| ACH-000012 | HCC827_LUNG                    | pralatrexate | 148121    | 0.067186384 |
| ACH-000941 | HEC1B_ENDOMETRIUM              | selinexor    | 71481097  | 0.067219702 |
| ACH-000792 | BFTC909_KIDNEY                 | filanesib    | 44224257  | 0.067267163 |
| ACH-000018 | T24_URINARY_TRACT              | filanesib    | 44224257  | 0.067270806 |
| ACH-000955 | SNU407_LARGE_INTESTINE         | pralatrexate | 148121    | 0.067277699 |
| ACH-001239 | WM2664_SKIN                    | vindesine    | 40839     | 0.067288681 |
| ACH-000860 | NCIH358_LUNG                   | pralatrexate | 148121    | 0.067376762 |
| ACH-000719 | RMGI_OVARY                     | BNC105       | 24786555  | 0.067410634 |
| ACH-000221 | SNU398_LIVER                   | tanespimycin | 6505803   | 0.067424244 |
| ACH-000421 | SW837_LARGE_INTESTINE          | alvespimycin | 5288674   | 0.067468399 |
| ACH-000650 | IGR37_SKIN                     | tosedostat   | 15547703  | 0.06748271  |

|            |                                 |              |           |             |
|------------|---------------------------------|--------------|-----------|-------------|
| ACH-000808 | HUH28_BILIARY_TRACT             | NVP-AUY922   | 135539077 | 0.067496435 |
| ACH-000232 | U251MG_CENTRAL_NERVOUS_SYSTEM   | ispinesib    | 6851740   | 0.067506227 |
| ACH-000329 | CCFSTTG1_CENTRAL_NERVOUS_SYSTEM | filanesib    | 44224257  | 0.067523533 |
| ACH-000504 | SNB75_CENTRAL_NERVOUS_SYSTEM    | elesclomol   | 300471    | 0.067535701 |
| ACH-000875 | NCIH2347_LUNG                   | filanesib    | 44224257  | 0.067586785 |
| ACH-000777 | KYSE30_OESOPHAGUS               | tanespimycin | 6505803   | 0.067592405 |
| ACH-000943 | RKO_LARGE_INTESTINE             | litronesib   | 25167017  | 0.067615838 |
| ACH-000648 | NCIH28_PLEURA                   | FK-866       | 6914657   | 0.067715712 |
| ACH-000159 | OSRC2_KIDNEY                    | pralatrexate | 148121    | 0.0677194   |
| ACH-000681 | A549_LUNG                       | filanesib    | 44224257  | 0.067724131 |
| ACH-000270 | HPAC_PANCREAS                   | alvespimycin | 5288674   | 0.067740003 |
| ACH-000783 | CAMA1_BREAST                    | colchicine   | 6167      | 0.067760351 |
| ACH-000783 | CAMA1_BREAST                    | vindesine    | 40839     | 0.067809276 |
| ACH-001075 | NCIH292_LUNG                    | pralatrexate | 148121    | 0.067820861 |
| ACH-000504 | SNB75_CENTRAL_NERVOUS_SYSTEM    | paclitaxel   | 36314     | 0.06788828  |
| ACH-000189 | RCC10RGB_KIDNEY                 | docetaxel    | 148124    | 0.067914719 |
| ACH-000280 | SNU840_OVARY                    | elesclomol   | 300471    | 0.067918375 |
| ACH-000324 | JHOC5_OVARY                     | vincristine  | 5388993   | 0.067999462 |
| ACH-000176 | LOUNH91_LUNG                    | alvespimycin | 5288674   | 0.068006329 |
| ACH-000174 | CAL62_THYROID                   | tanespimycin | 6505803   | 0.068025811 |
| ACH-000423 | SKMEL3_SKIN                     | filanesib    | 44224257  | 0.068038572 |
| ACH-000570 | YKG1_CENTRAL_NERVOUS_SYSTEM     | pralatrexate | 148121    | 0.068064294 |
| ACH-000996 | HEC251_ENDOMETRIUM              | elesclomol   | 300471    | 0.068081684 |
| ACH-000898 | SNU719_STOMACH                  | filanesib    | 44224257  | 0.068094954 |
| ACH-000719 | RMGI_OVARY                      | BI-2536      | 11364421  | 0.068117153 |
| ACH-000599 | PATU8902_PANCREAS               | pralatrexate | 148121    | 0.068127843 |
| ACH-000882 | IGR1_SKIN                       | paclitaxel   | 36314     | 0.068174462 |
| ACH-000681 | A549_LUNG                       | pralatrexate | 148121    | 0.068225965 |
| ACH-000893 | NCIH1651_LUNG                   | docetaxel    | 148124    | 0.06829903  |
| ACH-000423 | SKMEL3_SKIN                     | paclitaxel   | 36314     | 0.068316948 |
| ACH-000182 | SNU869_BILIARY_TRACT            | tanespimycin | 6505803   | 0.06833066  |
| ACH-000840 | HCC366_LUNG                     | pralatrexate | 148121    | 0.068497905 |
| ACH-000753 | JMSU1_URINARY_TRACT             | filanesib    | 44224257  | 0.068508031 |
| ACH-000211 | DAOY_CENTRAL_NERVOUS_SYSTEM     | temsirolimus | 129009966 | 0.068526612 |
| ACH-001239 | WM2664_SKIN                     | cabazitaxel  | 129009963 | 0.068593078 |
| ACH-000318 | TE10_OESOPHAGUS                 | pralatrexate | 148121    | 0.068663137 |
| ACH-000352 | HCC1428_BREAST                  | paclitaxel   | 36314     | 0.068703179 |
| ACH-000408 | TE5_OESOPHAGUS                  | filanesib    | 44224257  | 0.068710684 |
| ACH-000903 | FTC133_THYROID                  | NVP-AUY922   | 135539077 | 0.068722353 |
| ACH-000661 | WM1799_SKIN                     | paclitaxel   | 36314     | 0.068792955 |
| ACH-000423 | SKMEL3_SKIN                     | tanespimycin | 6505803   | 0.068849421 |
| ACH-000579 | UACC257_SKIN                    | vindesine    | 40839     | 0.068864447 |
| ACH-000785 | NCIH2126_LUNG                   | pralatrexate | 148121    | 0.068893269 |

|            |                                |              |           |             |
|------------|--------------------------------|--------------|-----------|-------------|
| ACH-000484 | VMRCRCW_KIDNEY                 | FK-866       | 6914657   | 0.068899625 |
| ACH-000572 | G361_SKIN                      | danusertib   | 11442891  | 0.068950115 |
| ACH-000374 | HCC1143_BREAST                 | ganetespib   | 135564985 | 0.069000431 |
| ACH-000352 | HCC1428_BREAST                 | vindesine    | 40839     | 0.069015104 |
| ACH-000842 | SW480_LARGE_INTESTINE          | BNC105       | 24786555  | 0.069080166 |
| ACH-000936 | EFO27_OVARY                    | NVP-AUY922   | 135539077 | 0.069170402 |
| ACH-000123 | COV434_OVARY                   | litronesib   | 25167017  | 0.069170663 |
| ACH-000939 | SKUT1_SOFT_TISSUE              | temsirolimus | 129009966 | 0.069269704 |
| ACH-000846 | FADU_UPPER_AERODIGESTIVE_TRACT | pipazine     | 4837      | 0.069285219 |
| ACH-000968 | COLO792_SKIN                   | pralatrexate | 148121    | 0.069297171 |
| ACH-000997 | HCT15_LARGE_INTESTINE          | pralatrexate | 148121    | 0.069342759 |
| ACH-000890 | SW1271_LUNG                    | temsirolimus | 129009966 | 0.069349026 |
| ACH-000102 | GMS10_CENTRAL_NERVOUS_SYSTEM   | docetaxel    | 148124    | 0.069364652 |
| ACH-000484 | VMRCRCW_KIDNEY                 | AZD8330      | 16666708  | 0.069394103 |
| ACH-000191 | BHT101_THYROID                 | paclitaxel   | 36314     | 0.069478994 |
| ACH-000408 | TE5_OESOPHAGUS                 | paclitaxel   | 36314     | 0.069536334 |
| ACH-000331 | ISTMES2_PLEURA                 | LY2606368    | 46700756  | 0.069608889 |
| ACH-000787 | LXF289_LUNG                    | ispinesib    | 6851740   | 0.069625754 |
| ACH-000719 | RMGI_OVARY                     | vindesine    | 40839     | 0.069648081 |
| ACH-000970 | SNUC5_LARGE_INTESTINE          | NSC-319726   | 5921672   | 0.06967053  |
| ACH-000901 | HCC1359_LUNG                   | pralatrexate | 148121    | 0.069685121 |
| ACH-000985 | LS411N_LARGE_INTESTINE         | pralatrexate | 148121    | 0.069736231 |
| ACH-000176 | LOUNH91_LUNG                   | NVP-AUY922   | 135539077 | 0.069841746 |
| ACH-000223 | HCC1937_BREAST                 | docetaxel    | 148124    | 0.069862807 |
| ACH-000495 | TUHR4TKB_KIDNEY                | alvespimycin | 5288674   | 0.069867704 |
| ACH-000517 | SNU410_PANCREAS                | NVP-AUY922   | 135539077 | 0.069873689 |
| ACH-000880 | AGS_STOMACH                    | ispinesib    | 6851740   | 0.069921228 |
| ACH-000791 | RERFLCAD1_LUNG                 | paclitaxel   | 36314     | 0.070214203 |
| ACH-000421 | SW837_LARGE_INTESTINE          | carfilzomib  | 11556711  | 0.070286841 |
| ACH-000882 | IGR1_SKIN                      | pralatrexate | 148121    | 0.070347789 |
| ACH-000756 | GII_CENTRAL_NERVOUS_SYSTEM     | temsirolimus | 129009966 | 0.070457977 |
| ACH-000404 | K029AX_SKIN                    | NVP-AUY922   | 135539077 | 0.070467927 |
| ACH-000810 | SKMEL30_SKIN                   | BAY-87-2243  | 67377767  | 0.070497071 |
| ACH-000804 | NB1_AUTONOMIC_GANGLIA          | elesclomol   | 300471    | 0.07068868  |
| ACH-000527 | OVI5_OVARY                     | floxuridine  | 5702211   | 0.070714643 |
| ACH-000572 | G361_SKIN                      | ganetespib   | 135564985 | 0.07076723  |
| ACH-000420 | SNU449_LIVER                   | alvespimycin | 5288674   | 0.070771974 |
| ACH-000893 | NCIH1651_LUNG                  | alvespimycin | 5288674   | 0.07078752  |
| ACH-000270 | HPAC_PANCREAS                  | ganetespib   | 135564985 | 0.070858083 |
| ACH-000250 | KMRC20_KIDNEY                  | NVP-AUY922   | 135539077 | 0.070937758 |
| ACH-000890 | SW1271_LUNG                    | tanespimycin | 6505803   | 0.071049009 |
| ACH-000661 | WM1799_SKIN                    | pralatrexate | 148121    | 0.071054621 |
| ACH-000862 | KMBC2_URINARY_TRACT            | temoporfin   | 60751     | 0.071082349 |

|            |                                  |                  |           |             |
|------------|----------------------------------|------------------|-----------|-------------|
| ACH-000804 | NB1_AUTONOMIC_GANGLIA            | temoporfin       | 60751     | 0.071090929 |
| ACH-000822 | SKMEL24_SKIN                     | FK-866           | 6914657   | 0.07116737  |
| ACH-000161 | CORL105_LUNG                     | docetaxel        | 148124    | 0.071184384 |
| ACH-000415 | BICR6_UPPER_AERODIGESTIVE_TRACT  | pralatrexate     | 148121    | 0.071222678 |
| ACH-000749 | DMS273_LUNG                      | AZD8330          | 16666708  | 0.071257572 |
| ACH-000420 | SNU449_LIVER                     | carfilzomib      | 11556711  | 0.071266307 |
| ACH-000810 | SKMEL30_SKIN                     | vindesine        | 40839     | 0.071295261 |
| ACH-000738 | GB1_CENTRAL_NERVOUS_SYSTEM       | alvespimycin     | 5288674   | 0.071312681 |
| ACH-000384 | SW780_URINARY_TRACT              | filanesib        | 44224257  | 0.07133908  |
| ACH-000027 | GOS3_CENTRAL_NERVOUS_SYSTEM      | NVP-AUY922       | 135539077 | 0.071354896 |
| ACH-000669 | SW900_LUNG                       | ganetespib       | 135564985 | 0.071426053 |
| ACH-000800 | NCIH446_LUNG                     | pralatrexate     | 148121    | 0.071437111 |
| ACH-000042 | PANC0203_PANCREAS                | FK-866           | 6914657   | 0.071520562 |
| ACH-000231 | KALS1_CENTRAL_NERVOUS_SYSTEM     | ispinesib        | 6851740   | 0.071591158 |
| ACH-000447 | NCIH2228_LUNG                    | dinaciclib       | 46926350  | 0.071594871 |
| ACH-000123 | COV434_OVARY                     | tanespimycin     | 6505803   | 0.071603001 |
| ACH-000503 | BICR16_UPPER_AERODIGESTIVE_TRACT | pralatrexate     | 148121    | 0.071650258 |
| ACH-000359 | MG63_BONE                        | toscdostat       | 15547703  | 0.071725999 |
| ACH-000014 | HS294T_SKIN                      | ispinesib        | 6851740   | 0.071811559 |
| ACH-000404 | K029AX_SKIN                      | filanesib        | 44224257  | 0.071832859 |
| ACH-000903 | FTC133_THYROID                   | temsirolimus     | 129009966 | 0.071878794 |
| ACH-001321 | TT_THYROID                       | alvespimycin     | 5288674   | 0.071885798 |
| ACH-000843 | HARA_LUNG                        | tanespimycin     | 6505803   | 0.071886956 |
| ACH-000822 | SKMEL24_SKIN                     | tanespimycin     | 6505803   | 0.071895967 |
| ACH-000716 | TT2609C02_THYROID                | ispinesib        | 6851740   | 0.07193466  |
| ACH-000766 | NCIH1648_LUNG                    | temoporfin       | 60751     | 0.071955302 |
| ACH-000678 | MKN7_STOMACH                     | tanespimycin     | 6505803   | 0.072015834 |
| ACH-000774 | RERFLCAD2_LUNG                   | ingenol-mebutate | 6918670   | 0.072085753 |
| ACH-000720 | TCCSUP_URINARY_TRACT             | pralatrexate     | 148121    | 0.072100896 |
| ACH-000086 | ACCMESO1_PLEURA                  | ingenol-mebutate | 6918670   | 0.072291575 |
| ACH-000376 | SF295_CENTRAL_NERVOUS_SYSTEM     | filanesib        | 44224257  | 0.072323605 |
| ACH-000888 | NCIH1793_LUNG                    | docetaxel        | 148124    | 0.072433011 |
| ACH-000562 | HCC78_LUNG                       | ispinesib        | 6851740   | 0.072496658 |
| ACH-000579 | UACC257_SKIN                     | docetaxel        | 148124    | 0.072545411 |
| ACH-000102 | GMS10_CENTRAL_NERVOUS_SYSTEM     | pralatrexate     | 148121    | 0.072547908 |
| ACH-000352 | HCC1428_BREAST                   | docetaxel        | 148124    | 0.07257108  |
| ACH-000471 | LI7_LIVER                        | filanesib        | 44224257  | 0.07257311  |
| ACH-000397 | TEN_ENDOMETRIUM                  | FK-866           | 6914657   | 0.072613692 |
| ACH-000701 | RMUGS_OVARY                      | FK-866           | 6914657   | 0.072629397 |
| ACH-000164 | PANC1_PANCREAS                   | docetaxel        | 148124    | 0.072630442 |
| ACH-000324 | JHOC5_OVARY                      | pralatrexate     | 148121    | 0.072632576 |
| ACH-000573 | MDAMB436_BREAST                  | pralatrexate     | 148121    | 0.072632656 |
| ACH-000903 | FTC133_THYROID                   | paclitaxel       | 36314     | 0.072811964 |

|            |                                      |                  |           |             |
|------------|--------------------------------------|------------------|-----------|-------------|
| ACH-000771 | BICR56_UPPER_AERODIGESTIVE_TRACT     | filanesib        | 44224257  | 0.072861679 |
| ACH-000924 | NCIH2172_LUNG                        | temsirolimus     | 129009966 | 0.0728622   |
| ACH-000027 | GOS3_CENTRAL_NERVOUS_SYSTEM          | pralatrexate     | 148121    | 0.072873378 |
| ACH-000788 | A2058_SKIN                           | temsirolimus     | 129009966 | 0.072956947 |
| ACH-000678 | MKN7_STOMACH                         | vindesine        | 40839     | 0.073074604 |
| ACH-000359 | MG63_BONE                            | pralatrexate     | 148121    | 0.07309216  |
| ACH-000803 | COLO668_LUNG                         | ingenol-mebutate | 6918670   | 0.073147533 |
| ACH-000868 | HCC1195_LUNG                         | NVP-AUY922       | 135539077 | 0.073222405 |
| ACH-000868 | HCC1195_LUNG                         | MPI-0479605      | 46909588  | 0.073278142 |
| ACH-000019 | MCF7_BREAST                          | bortezomib       | 387447    | 0.073304934 |
| ACH-000613 | HOS_BONE                             | elesclomol       | 300471    | 0.073316496 |
| ACH-000329 | CCFSTTG1_CENTRAL_NERVOUS_SYSTEM      | BI-2536          | 11364421  | 0.073347124 |
| ACH-000164 | PANC1_PANCREAS                       | vinblastine      | 13342     | 0.073430809 |
| ACH-000527 | OVI5E_OVARY                          | pralatrexate     | 148121    | 0.073449057 |
| ACH-000495 | TUHR4TKB_KIDNEY                      | docetaxel        | 148124    | 0.073500276 |
| ACH-000209 | SNU1079_BILIARY_TRACT                | docetaxel        | 148124    | 0.07355723  |
| ACH-000019 | MCF7_BREAST                          | pralatrexate     | 148121    | 0.073578117 |
| ACH-000936 | EFO27_OVARY                          | filanesib        | 44224257  | 0.073583009 |
| ACH-000648 | NCIH28_PLEURA                        | NVP-AUY922       | 135539077 | 0.073659334 |
| ACH-000086 | ACCMESO1_PLEURA                      | pralatrexate     | 148121    | 0.07366925  |
| ACH-000347 | QGP1_PANCREAS                        | docetaxel        | 148124    | 0.073692751 |
| ACH-000054 | HT1080_SOFT_TISSUE                   | piperazine       | 4837      | 0.07372937  |
| ACH-000804 | NB1_AUTONOMIC_GANGLIA                | piperazine       | 4837      | 0.073774744 |
| ACH-000097 | ZR751_BREAST                         | ganetespiib      | 135564985 | 0.073800349 |
| ACH-000235 | PANC0403_PANCREAS                    | filanesib        | 44224257  | 0.073836024 |
| ACH-000296 | OUMS23_LARGE_INTESTINE               | filanesib        | 44224257  | 0.073852144 |
| ACH-000679 | OE19_OESOPHAGUS                      | paclitaxel       | 36314     | 0.073901245 |
| ACH-000479 | KNS81_CENTRAL_NERVOUS_SYSTEM         | dinaciclib       | 46926350  | 0.073936179 |
| ACH-000277 | HCC1419_BREAST                       | filanesib        | 44224257  | 0.073945957 |
| ACH-000441 | SH4_SKIN                             | paclitaxel       | 36314     | 0.073963642 |
| ACH-000652 | SUIT2_PANCREAS                       | FK-866           | 6914657   | 0.073983534 |
| ACH-000207 | DETROIT562_UPPER_AERODIGESTIVE_TRACT | ingenol-mebutate | 6918670   | 0.074003018 |
| ACH-000684 | KMRC1_KIDNEY                         | alvespimycin     | 5288674   | 0.074037505 |
| ACH-000476 | JHH4_LIVER                           | NVP-AUY922       | 135539077 | 0.074085769 |
| ACH-000911 | NUGC3_STOMACH                        | poziotinib       | 25127713  | 0.074115944 |
| ACH-000228 | BICR31_UPPER_AERODIGESTIVE_TRACT     | tanespimycin     | 6505803   | 0.074122281 |
| ACH-000211 | DAOY_CENTRAL_NERVOUS_SYSTEM          | tanespimycin     | 6505803   | 0.074148986 |
| ACH-000433 | CAKII_KIDNEY                         | BI-2536          | 11364421  | 0.074161398 |
| ACH-000118 | HUPT3_PANCREAS                       | tanespimycin     | 6505803   | 0.074196145 |
| ACH-000035 | NCIH1650_LUNG                        | vinflunine       | 11967282  | 0.074206267 |
| ACH-000482 | RERFLCKJ_LUNG                        | GSK461364        | 15983966  | 0.074219406 |
| ACH-000244 | DKMG_CENTRAL_NERVOUS_SYSTEM          | filanesib        | 44224257  | 0.074228861 |
| ACH-000232 | U251MG_CENTRAL_NERVOUS_SYSTEM        | rigosertib       | 6918736   | 0.07423365  |

|            |                                   |                             |           |             |
|------------|-----------------------------------|-----------------------------|-----------|-------------|
| ACH-000945 | NCIH650_LUNG                      | elesclomol                  | 300471    | 0.074235371 |
| ACH-000609 | SF126_CENTRAL_NERVOUS_SYSTEM      | paclitaxel                  | 36314     | 0.074291394 |
| ACH-000270 | HPAC_PANCREAS                     | BI-2536                     | 11364421  | 0.074295977 |
| ACH-000155 | SW1990_PANCREAS                   | paclitaxel                  | 36314     | 0.074330921 |
| ACH-000457 | CAL54_KIDNEY                      | NVP-AUY922                  | 135539077 | 0.074349019 |
| ACH-000517 | SNU410_PANCREAS                   | ganetespi                   | 135564985 | 0.074373532 |
| ACH-000046 | ACHN_KIDNEY                       | tanespimycin                | 6505803   | 0.07440725  |
| ACH-000153 | NCIH2052_PLEURA                   | Ro-4987655                  | 11548630  | 0.074434432 |
| ACH-000163 | SW579_THYROID                     | 7-aminocephalosporanic-acid | 441328    | 0.074475868 |
| ACH-000141 | SNU308_BILIARY_TRACT              | ganetespi                   | 135564985 | 0.074484518 |
| ACH-000408 | TE5_OESOPHAGUS                    | tanespimycin                | 6505803   | 0.074504415 |
| ACH-000433 | CAK11_KIDNEY                      | filanesib                   | 44224257  | 0.074554736 |
| ACH-000532 | SNU61_LARGE_INTESTINE             | pralatrexate                | 148121    | 0.074564503 |
| ACH-000846 | FADU_UPPER_AERODIGESTIVE_TRACT    | ingenol-mebutate            | 6918670   | 0.074672869 |
| ACH-000343 | NCIH522_LUNG                      | ganetespi                   | 135564985 | 0.074710398 |
| ACH-001239 | WM2664_SKIN                       | docetaxel                   | 148124    | 0.074729304 |
| ACH-000164 | PANC1_PANCREAS                    | paclitaxel                  | 36314     | 0.074751205 |
| ACH-000302 | SNU1077_ENDOMETRIUM               | ganetespi                   | 135564985 | 0.074752621 |
| ACH-000715 | SNU1214_UPPER_AERODIGESTIVE_TRACT | tanespimycin                | 6505803   | 0.074756204 |
| ACH-000579 | UACC257_SKIN                      | NVP-AUY922                  | 135539077 | 0.07479183  |
| ACH-000967 | SNUC2A_LARGE_INTESTINE            | ganetespi                   | 135564985 | 0.074827778 |
| ACH-000417 | PANC0813_PANCREAS                 | temsirolimus                | 129009966 | 0.074830494 |
| ACH-000974 | SNGM_ENDOMETRIUM                  | tanespimycin                | 6505803   | 0.074859819 |
| ACH-000266 | SNU213_PANCREAS                   | FK-866                      | 6914657   | 0.074871591 |
| ACH-000893 | NCIH1651_LUNG                     | NVP-AUY922                  | 135539077 | 0.074891469 |
| ACH-000803 | COLO668_LUNG                      | paclitaxel                  | 36314     | 0.074902633 |
| ACH-000141 | SNU308_BILIARY_TRACT              | pralatrexate                | 148121    | 0.075054073 |
| ACH-000307 | PK1_PANCREAS                      | litronesib                  | 25167017  | 0.075096833 |
| ACH-000102 | GMS10_CENTRAL_NERVOUS_SYSTEM      | tanespimycin                | 6505803   | 0.075102569 |
| ACH-000082 | G292CLONEA141B1_BONE              | tosedostat                  | 15547703  | 0.075206753 |
| ACH-000881 | MELJUSO_SKIN                      | pralatrexate                | 148121    | 0.075258985 |
| ACH-000856 | CAL51_BREAST                      | paclitaxel                  | 36314     | 0.075311667 |
| ACH-000099 | SIMA_AUTONOMIC_GANGLIA            | NVP-AUY922                  | 135539077 | 0.075315762 |
| ACH-000893 | NCIH1651_LUNG                     | ganetespi                   | 135564985 | 0.075358387 |
| ACH-000663 | OVTOKO_OVARY                      | alvespimycin                | 5288674   | 0.075373886 |
| ACH-000223 | HCC1937_BREAST                    | filanesib                   | 44224257  | 0.075445019 |
| ACH-000681 | A549_LUNG                         | paclitaxel                  | 36314     | 0.075465369 |
| ACH-000558 | A172_CENTRAL_NERVOUS_SYSTEM       | dinacilib                   | 46926350  | 0.075475398 |
| ACH-000322 | HT144_SKIN                        | piperazine                  | 4837      | 0.07553866  |
| ACH-000888 | NCIH1793_LUNG                     | dinacilib                   | 46926350  | 0.075563085 |
| ACH-000500 | SNU46_UPPER_AERODIGESTIVE_TRACT   | elesclomol                  | 300471    | 0.075592501 |
| ACH-000885 | TOV21G_OVARY                      | piperazine                  | 4837      | 0.075601239 |
| ACH-000488 | TE11_OESOPHAGUS                   | dasatinib                   | 3062316   | 0.075604435 |

|            |                                 |              |           |             |
|------------|---------------------------------|--------------|-----------|-------------|
| ACH-000652 | SUIT2_PANCREAS                  | NVP-AUY922   | 135539077 | 0.075611208 |
| ACH-000250 | KMRC20_KIDNEY                   | ganetespi    | 135564985 | 0.07561352  |
| ACH-000565 | RCM1_LARGE_INTESTINE            | litronesib   | 25167017  | 0.075867072 |
| ACH-000209 | SNU1079_BILIARY_TRACT           | alvespimycin | 5288674   | 0.07587611  |
| ACH-000352 | HCC1428_BREAST                  | NSC-319726   | 5921672   | 0.075926426 |
| ACH-000270 | HPAC_PANCREAS                   | raltitrexed  | 135400182 | 0.075927291 |
| ACH-000102 | GMS10_CENTRAL_NERVOUS_SYSTEM    | paclitaxel   | 36314     | 0.075930364 |
| ACH-000875 | NCIH2347_LUNG                   | pralatrexate | 148121    | 0.075965707 |
| ACH-000047 | GCIY_STOMACH                    | rigosertib   | 6918736   | 0.075972501 |
| ACH-000878 | HCC15_LUNG                      | litronesib   | 25167017  | 0.075977564 |
| ACH-000573 | MDAMB436_BREAST                 | ispinesib    | 6851740   | 0.076086226 |
| ACH-000527 | OVISE_OVARY                     | paclitaxel   | 36314     | 0.076087009 |
| ACH-001239 | WM2664_SKIN                     | BI-2536      | 11364421  | 0.076133486 |
| ACH-000288 | BT549_BREAST                    | tanespimycin | 6505803   | 0.076169636 |
| ACH-000007 | LS513_LARGE_INTESTINE           | alvespimycin | 5288674   | 0.076217422 |
| ACH-000805 | COLO679_SKIN                    | piperazine   | 4837      | 0.076268899 |
| ACH-000802 | BFTC905_URINARY_TRACT           | tanespimycin | 6505803   | 0.076283128 |
| ACH-000332 | YAPC_PANCREAS                   | tanespimycin | 6505803   | 0.076291755 |
| ACH-000161 | CORL105_LUNG                    | filanesib    | 44224257  | 0.076411271 |
| ACH-000292 | NCIH841_LUNG                    | tanespimycin | 6505803   | 0.076420813 |
| ACH-000141 | SNU308_BILIARY_TRACT            | elesclomol   | 300471    | 0.076513915 |
| ACH-000420 | SNU449_LIVER                    | docetaxel    | 148124    | 0.076637315 |
| ACH-000420 | SNU449_LIVER                    | pralatrexate | 148121    | 0.076641085 |
| ACH-000082 | G292CLONEA141B1_BONE            | ganetespi    | 135564985 | 0.076739002 |
| ACH-000099 | SIMA_AUTONOMIC_GANGLIA          | filanesib    | 44224257  | 0.076740347 |
| ACH-000812 | COLO783_SKIN                    | temsirolimus | 129009966 | 0.076786028 |
| ACH-000329 | CCFSTTG1_CENTRAL_NERVOUS_SYSTEM | paclitaxel   | 36314     | 0.076848294 |
| ACH-000950 | LOVO_LARGE_INTESTINE            | paclitaxel   | 36314     | 0.076869173 |
| ACH-000359 | MG63_BONE                       | panobinostat | 6918837   | 0.076884947 |
| ACH-000965 | RL952_ENDOMETRIUM               | altretamine  | 2123      | 0.076900729 |
| ACH-000347 | QGP1_PANCREAS                   | paclitaxel   | 36314     | 0.076907347 |
| ACH-000022 | PATU8988S_PANCREAS              | vindesine    | 40839     | 0.077090095 |
| ACH-000210 | CADOES1_BONE                    | filanesib    | 44224257  | 0.077101418 |
| ACH-000792 | BFTC909_KIDNEY                  | NSC-319726   | 5921672   | 0.077120299 |
| ACH-000397 | TEN_ENDOMETRIUM                 | paclitaxel   | 36314     | 0.077122427 |
| ACH-000042 | PANC0203_PANCREAS               | filanesib    | 44224257  | 0.077179434 |
| ACH-000361 | SKHEP1_LIVER                    | temsirolimus | 129009966 | 0.077195441 |
| ACH-000209 | SNU1079_BILIARY_TRACT           | NVP-AUY922   | 135539077 | 0.077257601 |
| ACH-000796 | MCAS_OVARY                      | rigosertib   | 6918736   | 0.077262683 |
| ACH-000684 | KMRC1_KIDNEY                    | filanesib    | 44224257  | 0.077274486 |
| ACH-000292 | NCIH841_LUNG                    | everolimus   | 6442177   | 0.077299897 |
| ACH-000027 | GOS3_CENTRAL_NERVOUS_SYSTEM     | BI-2536      | 11364421  | 0.077304441 |
| ACH-000678 | MKN7_STOMACH                    | pralatrexate | 148121    | 0.07732483  |

|            |                                  |              |           |             |
|------------|----------------------------------|--------------|-----------|-------------|
| ACH-000954 | HEC1A_ENDOMETRIUM                | elesclomol   | 300471    | 0.077422185 |
| ACH-000479 | KNS81_CENTRAL_NERVOUS_SYSTEM     | temsirolimus | 129009966 | 0.077431713 |
| ACH-000762 | YD38_UPPER_AERODIGESTIVE_TRACT   | pralatrexate | 148121    | 0.077473941 |
| ACH-000018 | T24_URINARY_TRACT                | ganetespi    | 135564985 | 0.077503924 |
| ACH-000401 | COLO800_SKIN                     | MPI-0479605  | 46909588  | 0.077611488 |
| ACH-000209 | SNU1079_BILIARY_TRACT            | ganetespi    | 135564985 | 0.077613232 |
| ACH-000434 | NCIH1915_LUNG                    | MPI-0479605  | 46909588  | 0.07767109  |
| ACH-000468 | PK45H_PANCREAS                   | pralatrexate | 148121    | 0.077826457 |
| ACH-000505 | RKN_SOFT_TISSUE                  | ispinesib    | 6851740   | 0.077875937 |
| ACH-000244 | DKMG_CENTRAL_NERVOUS_SYSTEM      | NVP-AUY922   | 135539077 | 0.077885307 |
| ACH-000288 | BT549_BREAST                     | everolimus   | 6442177   | 0.077925681 |
| ACH-000332 | YAPC_PANCREAS                    | GSK461364    | 15983966  | 0.077941616 |
| ACH-000579 | UACC257_SKIN                     | paclitaxel   | 36314     | 0.078007663 |
| ACH-000344 | SNU668_STOMACH                   | docetaxel    | 148124    | 0.078014578 |
| ACH-000943 | RKO_LARGE_INTESTINE              | ispinesib    | 6851740   | 0.078043807 |
| ACH-000643 | HDQP1_BREAST                     | pralatrexate | 148121    | 0.078058092 |
| ACH-000805 | COLO679_SKIN                     | ispinesib    | 6851740   | 0.078115533 |
| ACH-000810 | SKMEL30_SKIN                     | tanespimycin | 6505803   | 0.078163059 |
| ACH-000771 | BICR56_UPPER_AERODIGESTIVE_TRACT | paclitaxel   | 36314     | 0.078253979 |
| ACH-001075 | NCIH292_LUNG                     | trametinib   | 11707110  | 0.078318272 |
| ACH-000479 | KNS81_CENTRAL_NERVOUS_SYSTEM     | pralatrexate | 148121    | 0.078350583 |
| ACH-000778 | HSC3_UPPER_AERODIGESTIVE_TRACT   | rigosertib   | 6918736   | 0.078372628 |
| ACH-000231 | KALS1_CENTRAL_NERVOUS_SYSTEM     | tanespimycin | 6505803   | 0.078418307 |
| ACH-000090 | PC3_PROSTATE                     | ispinesib    | 6851740   | 0.078434996 |
| ACH-000888 | NCIH1793_LUNG                    | paclitaxel   | 36314     | 0.078441314 |
| ACH-000856 | CAL51_BREAST                     | pralatrexate | 148121    | 0.078453539 |
| ACH-000814 | HS939T_SKIN                      | vinblastine  | 13342     | 0.078479411 |
| ACH-000476 | JHH4_LIVER                       | pralatrexate | 148121    | 0.078525313 |
| ACH-000018 | T24_URINARY_TRACT                | NVP-AUY922   | 135539077 | 0.07853823  |
| ACH-000991 | SNU81_LARGE_INTESTINE            | tanespimycin | 6505803   | 0.078693984 |
| ACH-000719 | RMGI_OVARY                       | pralatrexate | 148121    | 0.078739411 |
| ACH-000582 | COLO741_SKIN                     | paclitaxel   | 36314     | 0.078747152 |
| ACH-000765 | WM983B_SKIN                      | docetaxel    | 148124    | 0.078757431 |
| ACH-000482 | RERFLCKJ_LUNG                    | temsirolimus | 129009966 | 0.078883959 |
| ACH-000826 | CAL12T_LUNG                      | bortezomib   | 387447    | 0.078943292 |
| ACH-000042 | PANC0203_PANCREAS                | pralatrexate | 148121    | 0.079017806 |
| ACH-000449 | MESSA_SOFT_TISSUE                | temoporfin   | 60751     | 0.079076146 |
| ACH-000117 | EFM192A_BREAST                   | elesclomol   | 300471    | 0.079093888 |
| ACH-000447 | NCIH2228_LUNG                    | pralatrexate | 148121    | 0.079136755 |
| ACH-000133 | HS729_SOFT_TISSUE                | temsirolimus | 129009966 | 0.079186576 |
| ACH-000903 | FTC133_THYROID                   | vindesine    | 40839     | 0.079199595 |
| ACH-000846 | FADU_UPPER_AERODIGESTIVE_TRACT   | NVP-BE2235   | 11977753  | 0.079222663 |
| ACH-000176 | LOUNH91_LUNG                     | dinacilib    | 46926350  | 0.079237985 |

|            |                                  |                  |           |             |
|------------|----------------------------------|------------------|-----------|-------------|
| ACH-000022 | PATU8988S_PANCREAS               | docetaxel        | 148124    | 0.079283478 |
| ACH-000842 | SW480_LARGE_INTESTINE            | filanesib        | 44224257  | 0.079295789 |
| ACH-000679 | OE19_OESOPHAGUS                  | ganetespi        | 135564985 | 0.079424437 |
| ACH-000946 | HEC265_ENDOMETRIUM               | everolimus       | 6442177   | 0.079457098 |
| ACH-000787 | LXF289_LUNG                      | pralatrexate     | 148121    | 0.079470773 |
| ACH-000086 | ACCMESO1_PLEURA                  | paclitaxel       | 36314     | 0.079510351 |
| ACH-000868 | HCC1195_LUNG                     | pralatrexate     | 148121    | 0.079548729 |
| ACH-000535 | BXPC3_PANCREAS                   | NSC-319726       | 5921672   | 0.079553705 |
| ACH-000376 | SF295_CENTRAL_NERVOUS_SYSTEM     | dinacilib        | 46926350  | 0.079595758 |
| ACH-000535 | BXPC3_PANCREAS                   | ingenol-mebutate | 6918670   | 0.079688632 |
| ACH-000863 | DBTRG05MG_CENTRAL_NERVOUS_SYSTEM | NVP-BEZ235       | 11977753  | 0.079776544 |
| ACH-000822 | SKMEL24_SKIN                     | dinacilib        | 46926350  | 0.079790343 |
| ACH-000974 | SNGM_ENDOMETRIUM                 | temsirolimus     | 129009966 | 0.079807349 |
| ACH-000476 | JHH4_LIVER                       | ganetespi        | 135564985 | 0.079832853 |
| ACH-000090 | PC3_PROSTATE                     | tanespimycin     | 6505803   | 0.079870069 |
| ACH-000191 | BHT101_THYROID                   | ispinesib        | 6851740   | 0.079878247 |
| ACH-000853 | NCIH661_LUNG                     | floxuridine      | 5702211   | 0.079895228 |
| ACH-000008 | A101D_SKIN                       | temsirolimus     | 129009966 | 0.079906084 |
| ACH-000176 | LOUNH91_LUNG                     | docetaxel        | 148124    | 0.079914907 |
| ACH-000493 | SNU423_LIVER                     | tanespimycin     | 6505803   | 0.079968209 |
| ACH-000480 | HUH7_LIVER                       | FK-866           | 6914657   | 0.080101856 |
| ACH-000480 | HUH7_LIVER                       | JNJ-26481585     | 11538455  | 0.08015476  |
| ACH-000447 | NCIH2228_LUNG                    | elesclomol       | 300471    | 0.080170477 |
| ACH-000332 | YAPC_PANCREAS                    | pralatrexate     | 148121    | 0.080171831 |
| ACH-000102 | GMS10_CENTRAL_NERVOUS_SYSTEM     | KX2-391          | 23635314  | 0.080224296 |
| ACH-000164 | PANC1_PANCREAS                   | tanespimycin     | 6505803   | 0.080318719 |
| ACH-000736 | SNU601_STOMACH                   | temsirolimus     | 129009966 | 0.080378562 |
| ACH-000781 | NCIH2023_LUNG                    | bortezomib       | 387447    | 0.080380072 |
| ACH-000783 | CAMA1_BREAST                     | vinblastine      | 13342     | 0.080490501 |
| ACH-000376 | SF295_CENTRAL_NERVOUS_SYSTEM     | pralatrexate     | 148121    | 0.080524885 |
| ACH-000827 | WM793_SKIN                       | MPI-0479605      | 46909588  | 0.08056136  |
| ACH-000762 | YD38_UPPER_AERODIGESTIVE_TRACT   | BAY-87-2243      | 67377767  | 0.080574732 |
| ACH-000783 | CAMA1_BREAST                     | bortezomib       | 387447    | 0.0806095   |
| ACH-000502 | TCCPAN2_PANCREAS                 | ingenol-mebutate | 6918670   | 0.080610349 |
| ACH-000954 | HEC1A_ENDOMETRIUM                | litronesib       | 25167017  | 0.080629443 |
| ACH-000592 | TM31_CENTRAL_NERVOUS_SYSTEM      | BNC105           | 24786555  | 0.080700482 |
| ACH-000680 | SW948_LARGE_INTESTINE            | ganetespi        | 135564985 | 0.080763085 |
| ACH-000433 | CAKII_KIDNEY                     | alvespimycin     | 5288674   | 0.080769381 |
| ACH-000457 | CAL54_KIDNEY                     | FK-866           | 6914657   | 0.080799706 |
| ACH-000235 | PANC0403_PANCREAS                | paclitaxel       | 36314     | 0.080806691 |
| ACH-000624 | HCC1806_BREAST                   | altretamine      | 2123      | 0.080905886 |
| ACH-000163 | SW579_THYROID                    | mubritinib       | 6444692   | 0.080916886 |
| ACH-000502 | TCCPAN2_PANCREAS                 | BAY-87-2243      | 67377767  | 0.080917808 |

|            |                                  |                  |           |             |
|------------|----------------------------------|------------------|-----------|-------------|
| ACH-001075 | NCIH292_LUNG                     | tanespimycin     | 6505803   | 0.080934463 |
| ACH-000404 | K029AX_SKIN                      | paclitaxel       | 36314     | 0.080942909 |
| ACH-000628 | NCIH596_LUNG                     | elesclomol       | 300471    | 0.080977283 |
| ACH-000847 | HGC27_STOMACH                    | panobinostat     | 6918837   | 0.081141738 |
| ACH-000421 | SW837_LARGE_INTESTINE            | docetaxel        | 148124    | 0.0811927   |
| ACH-000046 | ACHN_KIDNEY                      | ispinesib        | 6851740   | 0.081222329 |
| ACH-000685 | L33_PANCREAS                     | pralatrexate     | 148121    | 0.081314904 |
| ACH-000018 | T24_URINARY_TRACT                | docetaxel        | 148124    | 0.081498346 |
| ACH-000322 | HT144_SKIN                       | ispinesib        | 6851740   | 0.081501407 |
| ACH-000441 | SH4_SKIN                         | panobinostat     | 6918837   | 0.081522013 |
| ACH-000808 | HUH28_BILIARY_TRACT              | pralatrexate     | 148121    | 0.081522654 |
| ACH-000420 | SNU449_LIVER                     | dinaciclub       | 46926350  | 0.081646034 |
| ACH-000669 | SW900_LUNG                       | tanespimycin     | 6505803   | 0.081658866 |
| ACH-000132 | JHOS2_OVARY                      | pralatrexate     | 148121    | 0.08166024  |
| ACH-000542 | HEYA8_OVARY                      | litronesib       | 25167017  | 0.081682458 |
| ACH-000182 | SNU869_BILIARY_TRACT             | trametinib       | 11707110  | 0.081702115 |
| ACH-000648 | NCIH28_PLEURA                    | tanespimycin     | 6505803   | 0.081775223 |
| ACH-000503 | BICR16_UPPER_AERODIGESTIVE_TRACT | poziotinib       | 25127713  | 0.08178127  |
| ACH-000433 | CAKI1_KIDNEY                     | cephalomannine   | 6436208   | 0.081808041 |
| ACH-000624 | HCC1806_BREAST                   | BAY-87-2243      | 67377767  | 0.081859087 |
| ACH-000278 | COV362_OVARY                     | tanespimycin     | 6505803   | 0.081886585 |
| ACH-000457 | CAL54_KIDNEY                     | alvespimycin     | 5288674   | 0.081887215 |
| ACH-000270 | HPAC_PANCREAS                    | filanesib        | 44224257  | 0.081895356 |
| ACH-000835 | GCT_SOFT_TISSUE                  | pralatrexate     | 148121    | 0.082031469 |
| ACH-000393 | HLF_LIVER                        | ingenol-mebutate | 6918670   | 0.082054859 |
| ACH-000389 | H4_CENTRAL_NERVOUS_SYSTEM        | AZD8330          | 16666708  | 0.082074322 |
| ACH-000469 | YH13_CENTRAL_NERVOUS_SYSTEM      | pralatrexate     | 148121    | 0.082134266 |
| ACH-000868 | HCC1195_LUNG                     | elesclomol       | 300471    | 0.082263653 |
| ACH-000846 | FADU_UPPER_AERODIGESTIVE_TRACT   | rigosertib       | 6918736   | 0.082436803 |
| ACH-000222 | ASPC1_PANCREAS                   | pralatrexate     | 148121    | 0.082539485 |
| ACH-000086 | ACCMES01_PLEURA                  | tanespimycin     | 6505803   | 0.082565537 |
| ACH-000900 | NCIH23_LUNG                      | temsirolimus     | 129009966 | 0.082594414 |
| ACH-000163 | SW579_THYROID                    | elesclomol       | 300471    | 0.082697982 |
| ACH-000826 | CAL12T_LUNG                      | tanespimycin     | 6505803   | 0.082783514 |
| ACH-000808 | HUH28_BILIARY_TRACT              | temsirolimus     | 129009966 | 0.082883026 |
| ACH-000441 | SH4_SKIN                         | tanespimycin     | 6505803   | 0.082934222 |
| ACH-000957 | LS180_LARGE_INTESTINE            | filanesib        | 44224257  | 0.082943046 |
| ACH-000885 | TOV21G_OVARY                     | temoporfin       | 60751     | 0.083075737 |
| ACH-000840 | HCC366_LUNG                      | tanespimycin     | 6505803   | 0.083107817 |
| ACH-000662 | CORL23_LUNG                      | rigosertib       | 6918736   | 0.083115491 |
| ACH-000476 | JHH4_LIVER                       | alvespimycin     | 5288674   | 0.08323531  |
| ACH-000153 | NCIH2052_PLEURA                  | pralatrexate     | 148121    | 0.083240412 |
| ACH-000593 | BC3C_URINARY_TRACT               | pralatrexate     | 148121    | 0.083241576 |

|            |                                   |                  |           |             |
|------------|-----------------------------------|------------------|-----------|-------------|
| ACH-000777 | KYSE30_OESOPHAGUS                 | litronesib       | 25167017  | 0.083285525 |
| ACH-000376 | SF295_CENTRAL_NERVOUS_SYSTEM      | temsirolimus     | 129009966 | 0.083340178 |
| ACH-000221 | SNU398_LIVER                      | irinotecan       | 60838     | 0.083398223 |
| ACH-000990 | HEC108_ENDOMETRIUM                | tanespimycin     | 6505803   | 0.083401362 |
| ACH-000890 | SW1271_LUNG                       | ispinesib        | 6851740   | 0.08359581  |
| ACH-000897 | FTC238_THYROID                    | elesclomol       | 300471    | 0.083606722 |
| ACH-000311 | NCIH2122_LUNG                     | everolimus       | 6442177   | 0.083665182 |
| ACH-000927 | BT474_BREAST                      | FK-866           | 6914657   | 0.083771409 |
| ACH-000117 | EFM192A_BREAST                    | tosedostat       | 15547703  | 0.083803981 |
| ACH-000775 | NCIH727_LUNG                      | epothilone-b     | 129010071 | 0.083874685 |
| ACH-000242 | RT4_URINARY_TRACT                 | SNS-314          | 24995524  | 0.083922635 |
| ACH-000545 | VMCUB1_URINARY_TRACT              | ingenol-mebutate | 6918670   | 0.083969465 |
| ACH-000161 | CORL105_LUNG                      | tanespimycin     | 6505803   | 0.084014049 |
| ACH-000842 | SW480_LARGE_INTESTINE             | tanespimycin     | 6505803   | 0.084112826 |
| ACH-000384 | SW780_URINARY_TRACT               | elesclomol       | 300471    | 0.084198181 |
| ACH-000232 | U251MG_CENTRAL_NERVOUS_SYSTEM     | temsirolimus     | 129009966 | 0.084297148 |
| ACH-000738 | GB1_CENTRAL_NERVOUS_SYSTEM        | docetaxel        | 148124    | 0.084302434 |
| ACH-000677 | SW1573_LUNG                       | litronesib       | 25167017  | 0.084396092 |
| ACH-000133 | HS729_SOFT_TISSUE                 | elesclomol       | 300471    | 0.084440651 |
| ACH-000677 | SW1573_LUNG                       | tanespimycin     | 6505803   | 0.084458535 |
| ACH-000019 | MCF7_BREAST                       | tanespimycin     | 6505803   | 0.084594449 |
| ACH-000587 | NCIH1975_LUNG                     | idasanutlin      | 53358942  | 0.084610743 |
| ACH-000791 | RERFLCAD1_LUNG                    | rigosertib       | 6918736   | 0.084618922 |
| ACH-000901 | HCC1359_LUNG                      | tanespimycin     | 6505803   | 0.08461976  |
| ACH-000273 | SF539_CENTRAL_NERVOUS_SYSTEM      | elesclomol       | 300471    | 0.084727744 |
| ACH-000277 | HCC1419_BREAST                    | BNC105           | 24786555  | 0.084757524 |
| ACH-000967 | SNUC2A_LARGE_INTESTINE            | pralatrexate     | 148121    | 0.084805492 |
| ACH-000444 | LU99_LUNG                         | litronesib       | 25167017  | 0.084850967 |
| ACH-000404 | K029AX_SKIN                       | ganetespiib      | 135564985 | 0.084967058 |
| ACH-000774 | RERFLCAD2_LUNG                    | plinabulin       | 9949641   | 0.084985268 |
| ACH-000502 | TCCPAN2_PANCREAS                  | filanesib        | 44224257  | 0.085023777 |
| ACH-000027 | GOS3_CENTRAL_NERVOUS_SYSTEM       | dinaciclilb      | 46926350  | 0.085049644 |
| ACH-000968 | COLO792_SKIN                      | LY2606368        | 46700756  | 0.085076629 |
| ACH-000163 | SW579_THYROID                     | alvocidib        | 5287969   | 0.085147518 |
| ACH-000331 | ISTMES2_PLEURA                    | bortezomib       | 387447    | 0.085191656 |
| ACH-000549 | SNU1076_UPPER_AERODIGESTIVE_TRACT | pralatrexate     | 148121    | 0.085324813 |
| ACH-000903 | FTC133_THYROID                    | dinaciclilb      | 46926350  | 0.085398043 |
| ACH-000332 | YAPC_PANCREAS                     | litronesib       | 25167017  | 0.085479281 |
| ACH-000457 | CAL54_KIDNEY                      | ganetespiib      | 135564985 | 0.085608219 |
| ACH-000368 | SNU1105_CENTRAL_NERVOUS_SYSTEM    | piperazine       | 4837      | 0.085613998 |
| ACH-000836 | YD15_SALIVARY_GLAND               | pralatrexate     | 148121    | 0.085683745 |
| ACH-000027 | GOS3_CENTRAL_NERVOUS_SYSTEM       | ganetespiib      | 135564985 | 0.08570982  |
| ACH-000842 | SW480_LARGE_INTESTINE             | pralatrexate     | 148121    | 0.085726424 |

|            |                              |                  |           |             |
|------------|------------------------------|------------------|-----------|-------------|
| ACH-000189 | RCC10RGB_KIDNEY              | elesclomol       | 300471    | 0.085897527 |
| ACH-000389 | H4_CENTRAL_NERVOUS_SYSTEM    | GSK461364        | 15983966  | 0.085979774 |
| ACH-000558 | A172_CENTRAL_NERVOUS_SYSTEM  | filanesib        | 44224257  | 0.085983909 |
| ACH-000361 | SKHEP1_LIVER                 | piperazine       | 4837      | 0.086036553 |
| ACH-000950 | LOVO_LARGE_INTESTINE         | trametinib       | 11707110  | 0.086105461 |
| ACH-000277 | HCC1419_BREAST               | paclitaxel       | 36314     | 0.08619552  |
| ACH-000407 | SNU685_ENDOMETRIUM           | tanespimycin     | 6505803   | 0.086250971 |
| ACH-000625 | HEP3B217_LIVER               | filanesib        | 44224257  | 0.086329459 |
| ACH-000161 | CORL105_LUNG                 | ingenol-mebutate | 6918670   | 0.086330653 |
| ACH-000903 | FTC133_THYROID               | everolimus       | 6442177   | 0.086368054 |
| ACH-000092 | NCIH2452_PLEURA              | pralatrexate     | 148121    | 0.086382607 |
| ACH-000868 | HCC1195_LUNG                 | ganetespib       | 135564985 | 0.086436059 |
| ACH-000086 | ACCMES01_PLEURA              | temsirolimus     | 129009966 | 0.086440712 |
| ACH-001239 | WM2664_SKIN                  | filanesib        | 44224257  | 0.086453279 |
| ACH-000296 | OUMS23_LARGE_INTESTINE       | tanespimycin     | 6505803   | 0.086475456 |
| ACH-000505 | RKN_SOFT_TISSUE              | tanespimycin     | 6505803   | 0.086491203 |
| ACH-000756 | G11_CENTRAL_NERVOUS_SYSTEM   | everolimus       | 6442177   | 0.086542532 |
| ACH-000441 | SH4_SKIN                     | filanesib        | 44224257  | 0.086588463 |
| ACH-000270 | HPAC_PANCREAS                | vindesine        | 40839     | 0.086617699 |
| ACH-000979 | DU145_PROSTATE               | temsirolimus     | 129009966 | 0.086779137 |
| ACH-000191 | BHT101_THYROID               | idasanutlin      | 53358942  | 0.086842545 |
| ACH-000376 | SF295_CENTRAL_NERVOUS_SYSTEM | BI-2536          | 11364421  | 0.086893093 |
| ACH-000495 | TUHR4TKB_KIDNEY              | pralatrexate     | 148121    | 0.086960616 |
| ACH-000090 | PC3_PROSTATE                 | temsirolimus     | 129009966 | 0.086973307 |
| ACH-000477 | MALME3M_SKIN                 | alvespimycin     | 5288674   | 0.087061332 |
| ACH-000810 | SKMEL30_SKIN                 | BNC105           | 24786555  | 0.087076076 |
| ACH-000834 | UMUC1_URINARY_TRACT          | ingenol-mebutate | 6918670   | 0.087097694 |
| ACH-000810 | SKMEL30_SKIN                 | docetaxel        | 148124    | 0.087100925 |
| ACH-000425 | UACC62_SKIN                  | tanespimycin     | 6505803   | 0.087113725 |
| ACH-000054 | HT1080_SOFT_TISSUE           | tanespimycin     | 6505803   | 0.08714031  |
| ACH-000082 | G292CLONEA141B1_BONE         | BI-2536          | 11364421  | 0.087189805 |
| ACH-000680 | SW948_LARGE_INTESTINE        | NVP-AUY922       | 135539077 | 0.08720155  |
| ACH-000632 | HS944T_SKIN                  | idasanutlin      | 53358942  | 0.087212562 |
| ACH-000625 | HEP3B217_LIVER               | KX2-391          | 23635314  | 0.08732483  |
| ACH-000903 | FTC133_THYROID               | ganetespib       | 135564985 | 0.087383074 |
| ACH-000309 | SKLU1_LUNG                   | docetaxel        | 148124    | 0.087385663 |
| ACH-000579 | UACC257_SKIN                 | vinblastine      | 13342     | 0.08752271  |
| ACH-000407 | SNU685_ENDOMETRIUM           | piperazine       | 4837      | 0.087558378 |
| ACH-000766 | NCIH1648_LUNG                | idasanutlin      | 53358942  | 0.08757044  |
| ACH-000496 | NCIH1792_LUNG                | elesclomol       | 300471    | 0.087619877 |
| ACH-000351 | MKN1_STOMACH                 | tanespimycin     | 6505803   | 0.087699604 |
| ACH-000266 | SNU213_PANCREAS              | crystal-violet   | 3468      | 0.08772674  |
| ACH-000627 | LCLC103H_LUNG                | tanespimycin     | 6505803   | 0.087738922 |

|            |                                |                  |           |             |
|------------|--------------------------------|------------------|-----------|-------------|
| ACH-000502 | TCCPAN2_PANCREAS               | paclitaxel       | 36314     | 0.087752567 |
| ACH-000479 | KNS81_CENTRAL_NERVOUS_SYSTEM   | ispinesib        | 6851740   | 0.087790461 |
| ACH-000505 | RKN_SOFT_TISSUE                | altretamine      | 2123      | 0.087846048 |
| ACH-000159 | OSRC2_KIDNEY                   | filanesib        | 44224257  | 0.087874859 |
| ACH-000679 | OE19_OESOPHAGUS                | pralatrexate     | 148121    | 0.08790111  |
| ACH-000957 | LS180_LARGE_INTESTINE          | docetaxel        | 148124    | 0.087919423 |
| ACH-000652 | SUIT2_PANCREAS                 | bortezomib       | 387447    | 0.087956594 |
| ACH-000822 | SKMEL24_SKIN                   | BNC105           | 24786555  | 0.088026064 |
| ACH-000098 | GAMG_CENTRAL_NERVOUS_SYSTEM    | elesclomol       | 300471    | 0.088185588 |
| ACH-000232 | U251MG_CENTRAL_NERVOUS_SYSTEM  | litronesib       | 25167017  | 0.088213062 |
| ACH-000423 | SKMEL3_SKIN                    | pralatrexate     | 148121    | 0.088309073 |
| ACH-000749 | DMS273_LUNG                    | tanespimycin     | 6505803   | 0.088373439 |
| ACH-000974 | SNGM_ENDOMETRIUM               | ingenol-mebutate | 6918670   | 0.088502054 |
| ACH-000307 | PK1_PANCREAS                   | temoporfin       | 60751     | 0.088504043 |
| ACH-000609 | SF126_CENTRAL_NERVOUS_SYSTEM   | temsirolimus     | 129009966 | 0.088529203 |
| ACH-000461 | SNU1196_BILIARY_TRACT          | pralatrexate     | 148121    | 0.088605948 |
| ACH-000416 | NCIH838_LUNG                   | temsirolimus     | 129009966 | 0.088656484 |
| ACH-000950 | LOVO_LARGE_INTESTINE           | ingenol-mebutate | 6918670   | 0.088721933 |
| ACH-000572 | G361_SKIN                      | tanespimycin     | 6505803   | 0.088743723 |
| ACH-000164 | PANC1_PANCREAS                 | filanesib        | 44224257  | 0.088755342 |
| ACH-000223 | HCC1937_BREAST                 | paclitaxel       | 36314     | 0.088776561 |
| ACH-000495 | TUHR4TKB_KIDNEY                | MLN0128          | 45375953  | 0.088787005 |
| ACH-000545 | VMCUB1_URINARY_TRACT           | BAY-87-2243      | 67377767  | 0.08882843  |
| ACH-000563 | EBC1_LUNG                      | piperazine       | 4837      | 0.088890395 |
| ACH-000374 | HCC1143_BREAST                 | pralatrexate     | 148121    | 0.088904967 |
| ACH-000035 | NCIH1650_LUNG                  | pralatrexate     | 148121    | 0.088908146 |
| ACH-000237 | JHOM1_OVARY                    | temoporfin       | 60751     | 0.08893892  |
| ACH-000950 | LOVO_LARGE_INTESTINE           | panobinostat     | 6918837   | 0.088969921 |
| ACH-000153 | NCIH2052_PLEURA                | trametinib       | 11707110  | 0.089107128 |
| ACH-000428 | UO31_KIDNEY                    | alvespimycin     | 5288674   | 0.089198617 |
| ACH-000997 | HCT15_LARGE_INTESTINE          | elesclomol       | 300471    | 0.089275921 |
| ACH-000968 | COLO792_SKIN                   | tanespimycin     | 6505803   | 0.089306753 |
| ACH-000570 | YKG1_CENTRAL_NERVOUS_SYSTEM    | temsirolimus     | 129009966 | 0.089377724 |
| ACH-000505 | RKN_SOFT_TISSUE                | piperazine       | 4837      | 0.089378265 |
| ACH-000778 | HSC3_UPPER_AERODIGESTIVE_TRACT | ispinesib        | 6851740   | 0.089388239 |
| ACH-001318 | PLCPRF5_LIVER                  | altretamine      | 2123      | 0.089393669 |
| ACH-000665 | SKMES1_LUNG                    | elesclomol       | 300471    | 0.089480276 |
| ACH-000853 | NCIH661_LUNG                   | temsirolimus     | 129009966 | 0.089629313 |
| ACH-000726 | TE14_OESOPHAGUS                | ingenol-mebutate | 6918670   | 0.089645838 |
| ACH-000624 | HCC1806_BREAST                 | pralatrexate     | 148121    | 0.089646522 |
| ACH-000542 | HEYA8_OVARY                    | ispinesib        | 6851740   | 0.089660908 |
| ACH-000846 | FADU_UPPER_AERODIGESTIVE_TRACT | elesclomol       | 300471    | 0.08967772  |
| ACH-000895 | CL34_LARGE_INTESTINE           | piperazine       | 4837      | 0.089687756 |

|            |                                   |                  |           |             |
|------------|-----------------------------------|------------------|-----------|-------------|
| ACH-000549 | SNU1076_UPPER_AERODIGESTIVE_TRACT | BNC105           | 24786555  | 0.089732521 |
| ACH-000447 | NCIH2228_LUNG                     | dasatinib        | 3062316   | 0.089780221 |
| ACH-000535 | BXPC3_PANCREAS                    | vindesine        | 40839     | 0.089858482 |
| ACH-000885 | TOV21G_OVARY                      | everolimus       | 6442177   | 0.089878517 |
| ACH-000677 | SW1573_LUNG                       | ispinesib        | 6851740   | 0.089894148 |
| ACH-000903 | FTC133_THYROID                    | vinblastine      | 13342     | 0.089897779 |
| ACH-000895 | CL34_LARGE_INTESTINE              | tosedostat       | 15547703  | 0.089959055 |
| ACH-000244 | DKMG_CENTRAL_NERVOUS_SYSTEM       | alvespimycin     | 5288674   | 0.089973003 |
| ACH-000783 | CAMA1_BREAST                      | BAY-87-2243      | 67377767  | 0.09005318  |
| ACH-000628 | NCIH596_LUNG                      | tanespimycin     | 6505803   | 0.09007076  |
| ACH-000955 | SNU407_LARGE_INTESTINE            | tanespimycin     | 6505803   | 0.090102892 |
| ACH-000990 | HEC108_ENDOMETRIUM                | temsirolimus     | 129009966 | 0.090126161 |
| ACH-000309 | SKLU1_LUNG                        | ingenol-mebutate | 6918670   | 0.090169317 |
| ACH-000913 | ESS1_ENDOMETRIUM                  | pralatrexate     | 148121    | 0.090210054 |
| ACH-000888 | NCIH1793_LUNG                     | bortezomib       | 387447    | 0.090236882 |
| ACH-000895 | CL34_LARGE_INTESTINE              | litronesib       | 25167017  | 0.090240789 |
| ACH-000480 | HUH7_LIVER                        | alvespimycin     | 5288674   | 0.090471799 |
| ACH-000879 | MFE296_ENDOMETRIUM                | tanespimycin     | 6505803   | 0.09047787  |
| ACH-000781 | NCIH2023_LUNG                     | vindesine        | 40839     | 0.090507986 |
| ACH-000895 | CL34_LARGE_INTESTINE              | idasanutlin      | 53358942  | 0.090543832 |
| ACH-000463 | NCIH460_LUNG                      | temoporfin       | 60751     | 0.090587721 |
| ACH-000007 | LS513_LARGE_INTESTINE             | pralatrexate     | 148121    | 0.090689758 |
| ACH-000517 | SNU410_PANCREAS                   | tanespimycin     | 6505803   | 0.090736399 |
| ACH-000153 | NCIH2052_PLEURA                   | PD-0325901       | 9826528   | 0.090750882 |
| ACH-000223 | HCC1937_BREAST                    | vindesine        | 40839     | 0.090798674 |
| ACH-000347 | QGP1_PANCREAS                     | NSC-319726       | 5921672   | 0.09082981  |
| ACH-000484 | VMRCRCW_KIDNEY                    | NVP-AUY922       | 135539077 | 0.090884322 |
| ACH-000302 | SNU1077_ENDOMETRIUM               | NVP-AUY922       | 135539077 | 0.090900142 |
| ACH-000704 | OAW42_OVARY                       | paclitaxel       | 36314     | 0.090933735 |
| ACH-000155 | SW1990_PANCREAS                   | ispinesib        | 6851740   | 0.091014746 |
| ACH-000331 | ISTMES2_PLEURA                    | filanesib        | 44224257  | 0.09112739  |
| ACH-000209 | SNU1079_BILIARY_TRACT             | elesclomol       | 300471    | 0.091171648 |
| ACH-001321 | TT_THYROID                        | dinaciclib       | 46926350  | 0.091245987 |
| ACH-000759 | MDAMB175VII_BREAST                | LY2606368        | 46700756  | 0.091305168 |
| ACH-000221 | SNU398_LIVER                      | temoporfin       | 60751     | 0.091349463 |
| ACH-000677 | SW1573_LUNG                       | pralatrexate     | 148121    | 0.091365422 |
| ACH-000018 | T24_URINARY_TRACT                 | BI-2536          | 11364421  | 0.091398425 |
| ACH-000393 | HLF_LIVER                         | ispinesib        | 6851740   | 0.091454392 |
| ACH-001321 | TT_THYROID                        | FK-866           | 6914657   | 0.091473597 |
| ACH-000142 | CAL29_URINARY_TRACT               | rigosertib       | 6918736   | 0.091473618 |
| ACH-000107 | CAPAN2_PANCREAS                   | pralatrexate     | 148121    | 0.091478715 |
| ACH-000066 | HCC4006_LUNG                      | elesclomol       | 300471    | 0.091512593 |
| ACH-000804 | NB1_AUTONOMIC_GANGLIA             | altretamine      | 2123      | 0.091572019 |

|            |                                   |                  |           |             |
|------------|-----------------------------------|------------------|-----------|-------------|
| ACH-000404 | K029AX_SKIN                       | temsirolimus     | 129009966 | 0.091605076 |
| ACH-000117 | EFM192A_BREAST                    | JNJ-26481585     | 11538455  | 0.09161221  |
| ACH-000416 | NCIH838_LUNG                      | PF-477736        | 135565545 | 0.091619848 |
| ACH-000785 | NCIH2126_LUNG                     | elesclomol       | 300471    | 0.091666442 |
| ACH-000178 | HS766T_PANCREAS                   | pralatrexate     | 148121    | 0.091667119 |
| ACH-000899 | WM88_SKIN                         | ganetespib       | 135564985 | 0.091677398 |
| ACH-000748 | SJSA1_BONE                        | paclitaxel       | 36314     | 0.091721066 |
| ACH-000882 | IGR1_SKIN                         | trametinib       | 11707110  | 0.091756347 |
| ACH-000035 | NCIH1650_LUNG                     | AZD8330          | 16666708  | 0.091758986 |
| ACH-000991 | SNU81_LARGE_INTESTINE             | temsirolimus     | 129009966 | 0.091788821 |
| ACH-000715 | SNU1214_UPPER_AERODIGESTIVE_TRACT | pralatrexate     | 148121    | 0.091805975 |
| ACH-000939 | SKUT1_SOFT_TISSUE                 | everolimus       | 6442177   | 0.091884117 |
| ACH-000972 | HEC151_ENDOMETRIUM                | tanespimycin     | 6505803   | 0.091884391 |
| ACH-000425 | UACC62_SKIN                       | AS-703026        | 44187362  | 0.091887351 |
| ACH-000212 | CAL120_BREAST                     | temsirolimus     | 129009966 | 0.091953415 |
| ACH-000833 | RH30_SOFT_TISSUE                  | KX2-391          | 23635314  | 0.091993339 |
| ACH-000138 | CFPAC1_PANCREAS                   | tanespimycin     | 6505803   | 0.091998638 |
| ACH-000593 | BC3C_URINARY_TRACT                | BNC105           | 24786555  | 0.092060933 |
| ACH-000164 | PANC1_PANCREAS                    | AZD8330          | 16666708  | 0.092077827 |
| ACH-000155 | SW1990_PANCREAS                   | temsirolimus     | 129009966 | 0.092117914 |
| ACH-000099 | SIMA_AUTONOMIC_GANGLIA            | pralatrexate     | 148121    | 0.092160647 |
| ACH-000211 | DAOY_CENTRAL_NERVOUS_SYSTEM       | MLN0128          | 45375953  | 0.092190489 |
| ACH-000579 | UACC257_SKIN                      | filanesib        | 44224257  | 0.092196763 |
| ACH-000176 | LOUNH91_LUNG                      | trametinib       | 11707110  | 0.092217399 |
| ACH-000847 | HGC27_STOMACH                     | idasanutlin      | 53358942  | 0.092247738 |
| ACH-000060 | PANC1005_PANCREAS                 | elesclomol       | 300471    | 0.0922631   |
| ACH-000324 | JHOC5_OVARY                       | tanespimycin     | 6505803   | 0.092282395 |
| ACH-000066 | HCC4006_LUNG                      | pralatrexate     | 148121    | 0.092283483 |
| ACH-000517 | SNU410_PANCREAS                   | bortezomib       | 387447    | 0.092302825 |
| ACH-000955 | SNU407_LARGE_INTESTINE            | temsirolimus     | 129009966 | 0.092307373 |
| ACH-000496 | NCIH1792_LUNG                     | ingenol-mebutate | 6918670   | 0.092325886 |
| ACH-000305 | ECG110_OESOPHAGUS                 | tanespimycin     | 6505803   | 0.092496423 |
| ACH-000846 | FADU_UPPER_AERODIGESTIVE_TRACT    | temsirolimus     | 129009966 | 0.092517722 |
| ACH-000107 | CAPAN2_PANCREAS                   | BI-2536          | 11364421  | 0.092528403 |
| ACH-000721 | HMC18_BREAST                      | idasanutlin      | 53358942  | 0.092530722 |
| ACH-000311 | NCIH2122_LUNG                     | talazoparib      | 135565082 | 0.092544909 |
| ACH-000890 | SW1271_LUNG                       | everolimus       | 6442177   | 0.092608389 |
| ACH-000396 | J82_URINARY_TRACT                 | ispinesib        | 6851740   | 0.092701367 |
| ACH-000329 | CCFSTTG1_CENTRAL_NERVOUS_SYSTEM   | pralatrexate     | 148121    | 0.092781751 |
| ACH-000421 | SW837_LARGE_INTESTINE             | paclitaxel       | 36314     | 0.092786184 |
| ACH-000764 | SH10TC_STOMACH                    | temoporfin       | 60751     | 0.092820044 |
| ACH-000954 | HEC1A_ENDOMETRIUM                 | temsirolimus     | 129009966 | 0.092903882 |
| ACH-000161 | CORL105_LUNG                      | pralatrexate     | 148121    | 0.09295581  |

|            |                                    |              |           |             |
|------------|------------------------------------|--------------|-----------|-------------|
| ACH-000890 | SW1271_LUNG                        | litronesib   | 25167017  | 0.092974139 |
| ACH-000324 | JHOC5_OVARY                        | ispinesib    | 6851740   | 0.093014865 |
| ACH-000117 | EFM192A_BREAST                     | tanespimycin | 6505803   | 0.093091161 |
| ACH-000403 | NCIH747_LARGE_INTESTINE            | BAY-87-2243  | 67377767  | 0.093101132 |
| ACH-000781 | NCIH2023_LUNG                      | filanesib    | 44224257  | 0.093111983 |
| ACH-000648 | NCIH28_PLEURA                      | filanesib    | 44224257  | 0.093134968 |
| ACH-000888 | NCIH1793_LUNG                      | pralatrexate | 148121    | 0.093177777 |
| ACH-000936 | EFO27_OVARY                        | paclitaxel   | 36314     | 0.093279712 |
| ACH-000311 | NCIH2122_LUNG                      | temoporfin   | 60751     | 0.093328844 |
| ACH-000573 | MDAMB436_BREAST                    | tanespimycin | 6505803   | 0.093351098 |
| ACH-000311 | NCIH2122_LUNG                      | dasatinib    | 3062316   | 0.093358595 |
| ACH-000777 | KYSE30_OESOPHAGUS                  | ispinesib    | 6851740   | 0.09338953  |
| ACH-000856 | CAL51_BREAST                       | tanespimycin | 6505803   | 0.093473111 |
| ACH-000415 | BICR6_UPPER_AERODIGESTIVE_TRACT    | ispinesib    | 6851740   | 0.093480993 |
| ACH-000893 | NCIH1651_LUNG                      | pralatrexate | 148121    | 0.093491527 |
| ACH-000221 | SNU398_LIVER                       | panobinostat | 6918837   | 0.093536419 |
| ACH-000389 | H4_CENTRAL_NERVOUS_SYSTEM          | pralatrexate | 148121    | 0.09354241  |
| ACH-000098 | GAMG_CENTRAL_NERVOUS_SYSTEM        | pralatrexate | 148121    | 0.093576494 |
| ACH-000652 | SUIT2_PANCREAS                     | clesclomol   | 300471    | 0.093579979 |
| ACH-000164 | PANC1_PANCREAS                     | NVP-AUY922   | 135539077 | 0.093599299 |
| ACH-000374 | HCC1143_BREAST                     | tanespimycin | 6505803   | 0.093660397 |
| ACH-000176 | LOUNH91_LUNG                       | tanespimycin | 6505803   | 0.093793464 |
| ACH-000813 | T3M10_LUNG                         | temsirolimus | 129009966 | 0.093848368 |
| ACH-000630 | YD8_UPPER_AERODIGESTIVE_TRACT      | alvespimycin | 5288674   | 0.093866637 |
| ACH-000434 | NCIH1915_LUNG                      | pralatrexate | 148121    | 0.093886178 |
| ACH-000735 | PECAPJ49_UPPER_AERODIGESTIVE_TRACT | temoporfin   | 60751     | 0.093909768 |
| ACH-000810 | SKMEL30_SKIN                       | filanesib    | 44224257  | 0.093945196 |
| ACH-000384 | SW780_URINARY_TRACT                | paclitaxel   | 36314     | 0.093962111 |
| ACH-000404 | K029AX_SKIN                        | pralatrexate | 148121    | 0.094051104 |
| ACH-000990 | HEC108_ENDOMETRIUM                 | paclitaxel   | 36314     | 0.094060646 |
| ACH-000096 | G401_SOFT_TISSUE                   | temoporfin   | 60751     | 0.094077005 |
| ACH-000572 | G361_SKIN                          | pralatrexate | 148121    | 0.094239918 |
| ACH-000909 | JHUEM2_ENDOMETRIUM                 | piperazine   | 4837      | 0.09424762  |
| ACH-000535 | BXPC3_PANCREAS                     | JNJ-26481585 | 11538455  | 0.094302516 |
| ACH-000261 | RERFLCAI_LUNG                      | NVP-BEZ235   | 11977753  | 0.094339916 |
| ACH-000288 | BT549_BREAST                       | panobinostat | 6918837   | 0.094360572 |
| ACH-000361 | SKHEP1_LIVER                       | tanespimycin | 6505803   | 0.094407751 |
| ACH-000558 | A172_CENTRAL_NERVOUS_SYSTEM        | docetaxel    | 148124    | 0.094430759 |
| ACH-000502 | TCCPAN2_PANCREAS                   | docetaxel    | 148124    | 0.094439664 |
| ACH-000313 | KMRC3_KIDNEY                       | tanespimycin | 6505803   | 0.094480564 |
| ACH-000758 | MKN74_STOMACH                      | alvespimycin | 5288674   | 0.094486927 |
| ACH-000955 | SNU407_LARGE_INTESTINE             | panobinostat | 6918837   | 0.09448859  |
| ACH-000324 | JHOC5_OVARY                        | litronesib   | 25167017  | 0.094491278 |

|            |                                 |                  |           |             |
|------------|---------------------------------|------------------|-----------|-------------|
| ACH-000393 | HLF_LIVER                       | tosedostat       | 15547703  | 0.094521793 |
| ACH-000141 | SNU308_BILIARY_TRACT            | BI-2536          | 11364421  | 0.094532935 |
| ACH-000671 | HUH6_LIVER                      | piperezine       | 4837      | 0.094584756 |
| ACH-000351 | MKN1_STOMACH                    | litronesib       | 25167017  | 0.094588725 |
| ACH-000669 | SW900_LUNG                      | ingenol-mebutate | 6918670   | 0.094589335 |
| ACH-001239 | WM2664_SKIN                     | paclitaxel       | 36314     | 0.094638762 |
| ACH-000480 | HUH7_LIVER                      | NVP-AUY922       | 135539077 | 0.094679339 |
| ACH-000759 | MDAMB175VII_BREAST              | colchicine       | 6167      | 0.094682256 |
| ACH-000456 | BCPAP_THYROID                   | BAY-87-2243      | 67377767  | 0.094686087 |
| ACH-000008 | A101D_SKIN                      | tanespimycin     | 6505803   | 0.094709446 |
| ACH-000408 | TE5_OESOPHAGUS                  | ingenol-mebutate | 6918670   | 0.094710362 |
| ACH-000311 | NCIH2122_LUNG                   | piperezine       | 4837      | 0.094794551 |
| ACH-000808 | HUH28_BILIARY_TRACT             | ganetespiib      | 135564985 | 0.094803289 |
| ACH-000444 | LU99_LUNG                       | temsirolimus     | 129009966 | 0.094803751 |
| ACH-000719 | RMGI_OVARY                      | tosedostat       | 15547703  | 0.094816737 |
| ACH-000500 | SNU46_UPPER_AERODIGESTIVE_TRACT | temsirolimus     | 129009966 | 0.094823562 |
| ACH-000359 | MG63_BONE                       | mubritinib       | 6444692   | 0.09488953  |
| ACH-000117 | EFM192A_BREAST                  | ganetespiib      | 135564985 | 0.094922665 |
| ACH-000008 | A101D_SKIN                      | ispinesib        | 6851740   | 0.094941621 |
| ACH-000133 | HS729_SOFT_TISSUE               | piperezine       | 4837      | 0.094965006 |
| ACH-000428 | UO31_KIDNEY                     | pralatrexate     | 148121    | 0.094968737 |
| ACH-000496 | NCIH1792_LUNG                   | SNS-314          | 24995524  | 0.094977902 |
| ACH-000484 | VMRCRCW_KIDNEY                  | alvespimycin     | 5288674   | 0.094979984 |
| ACH-000788 | A2058_SKIN                      | everolimus       | 6442177   | 0.09503317  |
| ACH-000652 | SUIT2_PANCREAS                  | filanesib        | 44224257  | 0.095125458 |
| ACH-000652 | SUIT2_PANCREAS                  | dinacilib        | 46926350  | 0.09512871  |
| ACH-000364 | U2OS_BONE                       | elesclomol       | 300471    | 0.095164523 |
| ACH-000758 | MKN74_STOMACH                   | epothilone-b     | 129010071 | 0.095245172 |
| ACH-000504 | SNB75_CENTRAL_NERVOUS_SYSTEM    | ganetespiib      | 135564985 | 0.095252208 |
| ACH-000849 | MDAMB468_BREAST                 | tanespimycin     | 6505803   | 0.095302191 |
| ACH-000235 | PANC0403_PANCREAS               | KX2-391          | 23635314  | 0.095535932 |
| ACH-000811 | SKOV3_OVARY                     | ispinesib        | 6851740   | 0.09556873  |
| ACH-000023 | PATU8988T_PANCREAS              | temoporfin       | 60751     | 0.095625462 |
| ACH-000587 | NCIH1975_LUNG                   | temoporfin       | 60751     | 0.095701139 |
| ACH-000417 | PANC0813_PANCREAS               | everolimus       | 6442177   | 0.095710089 |
| ACH-000344 | SNU668_STOMACH                  | filanesib        | 44224257  | 0.095772902 |
| ACH-000563 | EBC1_LUNG                       | altretamine      | 2123      | 0.095855347 |
| ACH-000841 | NCIH2087_LUNG                   | ispinesib        | 6851740   | 0.095860824 |
| ACH-000822 | SKMEL24_SKIN                    | ingenol-mebutate | 6918670   | 0.095942349 |
| ACH-000950 | LOVO_LARGE_INTESTINE            | altretamine      | 2123      | 0.095965249 |
| ACH-000316 | SNU886_LIVER                    | tanespimycin     | 6505803   | 0.095988818 |
| ACH-000178 | HS766T_PANCREAS                 | tanespimycin     | 6505803   | 0.096024827 |
| ACH-000579 | UACC257_SKIN                    | pralatrexate     | 148121    | 0.096111159 |

|            |                               |                  |           |             |
|------------|-------------------------------|------------------|-----------|-------------|
| ACH-000012 | HCC827_LUNG                   | litronesib       | 25167017  | 0.09611338  |
| ACH-000332 | YAPC_PANCREAS                 | ingenol-mebutate | 6918670   | 0.096114822 |
| ACH-000941 | HEC1B_ENDOMETRIUM             | docetaxel        | 148124    | 0.096134537 |
| ACH-000244 | DKMG_CENTRAL_NERVOUS_SYSTEM   | pralatrexate     | 148121    | 0.096176541 |
| ACH-000243 | DANG_PANCREAS                 | everolimus       | 6442177   | 0.09624854  |
| ACH-000273 | SF539_CENTRAL_NERVOUS_SYSTEM  | temsirolimus     | 129009966 | 0.096348413 |
| ACH-000496 | NCIH1792_LUNG                 | temsirolimus     | 129009966 | 0.096369668 |
| ACH-000102 | GMS10_CENTRAL_NERVOUS_SYSTEM  | vincristine      | 5388993   | 0.096432498 |
| ACH-000022 | PATU8988S_PANCREAS            | paclitaxel       | 36314     | 0.096437075 |
| ACH-000219 | A375_SKIN                     | paclitaxel       | 36314     | 0.09648072  |
| ACH-000736 | SNU601_STOMACH                | everolimus       | 6442177   | 0.096692129 |
| ACH-000288 | BT549_BREAST                  | piperazine       | 4837      | 0.096702205 |
| ACH-000768 | MDAMB231_BREAST               | temsirolimus     | 129009966 | 0.096703725 |
| ACH-000375 | G402_SOFT_TISSUE              | rigosertib       | 6918736   | 0.096864199 |
| ACH-000783 | CAMA1_BREAST                  | filanesib        | 44224257  | 0.096908342 |
| ACH-000994 | HEC59_ENDOMETRIUM             | everolimus       | 6442177   | 0.096925356 |
| ACH-000232 | U251MG_CENTRAL_NERVOUS_SYSTEM | volasertib       | 10461508  | 0.096949443 |
| ACH-000979 | DU145_PROSTATE                | pralatrexate     | 148121    | 0.096958471 |
| ACH-000235 | PANC0403_PANCREAS             | pralatrexate     | 148121    | 0.097031696 |
| ACH-000479 | KNS81_CENTRAL_NERVOUS_SYSTEM  | everolimus       | 6442177   | 0.09704244  |
| ACH-000244 | DKMG_CENTRAL_NERVOUS_SYSTEM   | ganetespi        | 135564985 | 0.097333454 |
| ACH-000856 | CAL51_BREAST                  | AZD8330          | 16666708  | 0.09741154  |
| ACH-000678 | MKN7_STOMACH                  | temsirolimus     | 129009966 | 0.097432332 |
| ACH-000118 | HUPT3_PANCREAS                | litronesib       | 25167017  | 0.097441268 |
| ACH-000452 | TE8_OESOPHAGUS                | BI-2536          | 11364421  | 0.097465207 |
| ACH-000008 | A101D_SKIN                    | elesclomol       | 300471    | 0.097481583 |
| ACH-000749 | DMS273_LUNG                   | temoporfin       | 60751     | 0.097534208 |
| ACH-000397 | TEN_ENDOMETRIUM               | tanespimycin     | 6505803   | 0.097685589 |
| ACH-000811 | SKOV3_OVARY                   | everolimus       | 6442177   | 0.097752411 |
| ACH-000159 | OSRC2_KIDNEY                  | temsirolimus     | 129009966 | 0.097772332 |
| ACH-000384 | SW780_URINARY_TRACT           | docetaxel        | 148124    | 0.097796659 |
| ACH-000810 | SKMEL30_SKIN                  | paclitaxel       | 36314     | 0.097808064 |
| ACH-000558 | A172_CENTRAL_NERVOUS_SYSTEM   | paclitaxel       | 36314     | 0.097827158 |
| ACH-000309 | SKLU1_LUNG                    | paclitaxel       | 36314     | 0.097862357 |
| ACH-000599 | PATU8902_PANCREAS             | tanespimycin     | 6505803   | 0.097915449 |
| ACH-000250 | KMRC20_KIDNEY                 | alvespimycin     | 5288674   | 0.097920035 |
| ACH-000652 | SUIT2_PANCREAS                | alvespimycin     | 5288674   | 0.097932917 |
| ACH-000097 | ZR751_BREAST                  | ispinesib        | 6851740   | 0.097949357 |
| ACH-000880 | AGS_STOMACH                   | temoporfin       | 60751     | 0.097955976 |
| ACH-000219 | A375_SKIN                     | ispinesib        | 6851740   | 0.097958578 |
| ACH-000701 | RMUGS_OVARY                   | filanesib        | 44224257  | 0.097980134 |
| ACH-000802 | BFTC905_URINARY_TRACT         | KX2-391          | 23635314  | 0.098031287 |
| ACH-000376 | SF295_CENTRAL_NERVOUS_SYSTEM  | vindesine        | 40839     | 0.098046541 |

|            |                                           |                  |           |             |
|------------|-------------------------------------------|------------------|-----------|-------------|
| ACH-000117 | EFM192A_BREAST                            | BNC105           | 24786555  | 0.09808044  |
| ACH-000427 | NCIN87_STOMACH                            | tanespimycin     | 6505803   | 0.098154944 |
| ACH-000853 | NCIH661_LUNG                              | rigosertib       | 6918736   | 0.098324749 |
| ACH-000352 | HCC1428_BREAST                            | NVP-AUY922       | 135539077 | 0.098378842 |
| ACH-000878 | HCC15_LUNG                                | temoporfin       | 60751     | 0.098431193 |
| ACH-000878 | HCC15_LUNG                                | temsirolimus     | 129009966 | 0.098433769 |
| ACH-000579 | UACC257_SKIN                              | BNC105           | 24786555  | 0.09845594  |
| ACH-000862 | KMBC2_URINARY_TRACT                       | rigosertib       | 6918736   | 0.098503394 |
| ACH-000632 | HS944T_SKIN                               | NVP-BEZ235       | 11977753  | 0.098577127 |
| ACH-000344 | SNU668_STOMACH                            | raltitrexed      | 135400182 | 0.098621585 |
| ACH-000834 | UMUC1_URINARY_TRACT                       | altretamine      | 2123      | 0.098628615 |
| ACH-000480 | HUH7_LIVER                                | selinexor        | 71481097  | 0.098646582 |
| ACH-000758 | MKN74_STOMACH                             | plinabulin       | 9949641   | 0.098694088 |
| ACH-000888 | NCIH1793_LUNG                             | ganetespiib      | 135564985 | 0.098731392 |
| ACH-000893 | NCIH1651_LUNG                             | paclitaxel       | 36314     | 0.098752939 |
| ACH-000447 | NCIH2228_LUNG                             | tanespimycin     | 6505803   | 0.098758535 |
| ACH-000762 | YD38_UPPER_AERODIGESTIVE_TRACT            | ingenol-mebutate | 6918670   | 0.098760747 |
| ACH-000396 | J82_URINARY_TRACT                         | litronesib       | 25167017  | 0.098774818 |
| ACH-000785 | NCIH2126_LUNG                             | GSK461364        | 15983966  | 0.098846509 |
| ACH-000868 | HCC1195_LUNG                              | litronesib       | 25167017  | 0.098924899 |
| ACH-000595 | LN229_CENTRAL_NERVOUS_SYSTEM              | NVP-AUY922       | 135539077 | 0.098927558 |
| ACH-000803 | COLO668_LUNG                              | tanespimycin     | 6505803   | 0.098941085 |
| ACH-000472 | HSC2_UPPER_AERODIGESTIVE_TRACT            | tanespimycin     | 6505803   | 0.09898619  |
| ACH-000732 | PECAPJ41CLONED2_UPPER_AERODIGESTIVE_TRACT | ispinesib        | 6851740   | 0.099105763 |
| ACH-000667 | HCC44_LUNG                                | temoporfin       | 60751     | 0.099107126 |
| ACH-000384 | SW780_URINARY_TRACT                       | NVP-AUY922       | 135539077 | 0.099131575 |
| ACH-000280 | SNU840_OVARY                              | temsirolimus     | 129009966 | 0.099214659 |
| ACH-000344 | SNU668_STOMACH                            | paclitaxel       | 36314     | 0.099225021 |
| ACH-000469 | YH13_CENTRAL_NERVOUS_SYSTEM               | elesclomol       | 300471    | 0.099257595 |
| ACH-000888 | NCIH1793_LUNG                             | tanespimycin     | 6505803   | 0.0992652   |
| ACH-000361 | SKHEP1_LIVER                              | temoporfin       | 60751     | 0.099265434 |
| ACH-000441 | SH4_SKIN                                  | vincristine      | 5388993   | 0.099294042 |
| ACH-000853 | NCIH661_LUNG                              | tanespimycin     | 6505803   | 0.099323549 |
| ACH-000758 | MKN74_STOMACH                             | cabazitaxel      | 129009963 | 0.099329356 |
| ACH-000936 | EFO27_OVARY                               | ganetespiib      | 135564985 | 0.099497956 |
| ACH-000260 | SKNAS_AUTONOMIC_GANGLIA                   | BAY-87-2243      | 67377767  | 0.099542439 |
| ACH-000909 | JHUEM2_ENDOMETRIUM                        | temsirolimus     | 129009966 | 0.099574914 |
| ACH-000862 | KMBC2_URINARY_TRACT                       | ouabain          | 11527152  | 0.099637876 |
| ACH-000376 | SF295_CENTRAL_NERVOUS_SYSTEM              | everolimus       | 6442177   | 0.099770404 |
| ACH-000592 | TM31_CENTRAL_NERVOUS_SYSTEM               | ingenol-mebutate | 6918670   | 0.099842072 |
| ACH-000441 | SH4_SKIN                                  | floxuridine      | 5702211   | 0.09991965  |
| ACH-000542 | HEYA8_OVARY                               | trametinib       | 11707110  | 0.099936988 |
| ACH-000750 | LOXIMV1_SKIN                              | piperazine       | 4837      | 0.099966843 |

|            |                                   |                        |           |             |
|------------|-----------------------------------|------------------------|-----------|-------------|
| ACH-000528 | ABC1_LUNG                         | tanespimycin           | 6505803   | 0.100030815 |
| ACH-000972 | HEC151_ENDOMETRIUM                | litronesib             | 25167017  | 0.100129703 |
| ACH-000324 | JHOC5_OVARY                       | GSK461364              | 15983966  | 0.100148305 |
| ACH-000292 | NCIH841_LUNG                      | piperazine             | 4837      | 0.100221112 |
| ACH-000976 | HUCCT1_BILIARY_TRACT              | litronesib             | 25167017  | 0.100265902 |
| ACH-000822 | SKMEL24_SKIN                      | filanesib              | 44224257  | 0.100269519 |
| ACH-000587 | NCIH1975_LUNG                     | litronesib             | 25167017  | 0.100272804 |
| ACH-000549 | SNU1076_UPPER_AERODIGESTIVE_TRACT | ingenol-mebutate       | 6918670   | 0.10028375  |
| ACH-000927 | BT474_BREAST                      | selinexor              | 71481097  | 0.100398799 |
| ACH-000535 | BXPC3_PANCREAS                    | filanesib              | 44224257  | 0.100529392 |
| ACH-000661 | WM1799_SKIN                       | ispinesib              | 6851740   | 0.100548527 |
| ACH-000781 | NCIH2023_LUNG                     | pralatrexate           | 148121    | 0.10056196  |
| ACH-000313 | KMRC3_KIDNEY                      | paclitaxel             | 36314     | 0.100569025 |
| ACH-000890 | SW1271_LUNG                       | rigosertib             | 6918736   | 0.10057775  |
| ACH-000022 | PATU8988S_PANCREAS                | tanespimycin           | 6505803   | 0.100582263 |
| ACH-000270 | HPAC_PANCREAS                     | BNC105                 | 24786555  | 0.100618778 |
| ACH-000250 | KMRC20_KIDNEY                     | pralatrexate           | 148121    | 0.100822639 |
| ACH-000544 | OE21_OESOPHAGUS                   | temsirolimus           | 129009966 | 0.100859606 |
| ACH-000812 | COLO783_SKIN                      | ispinesib              | 6851740   | 0.100873548 |
| ACH-000721 | HMC18_BREAST                      | temoporfin             | 60751     | 0.100886129 |
| ACH-000657 | A2780_OVARY                       | NVP-BEZ235             | 11977753  | 0.100912357 |
| ACH-000008 | A101D_SKIN                        | vinflunine             | 11967282  | 0.100972023 |
| ACH-000132 | JHOS2_OVARY                       | temsirolimus           | 129009966 | 0.100989013 |
| ACH-000452 | TE8_OESOPHAGUS                    | ingenol-mebutate       | 6918670   | 0.101017141 |
| ACH-000211 | DAOY_CENTRAL_NERVOUS_SYSTEM       | everolimus             | 6442177   | 0.101023198 |
| ACH-000313 | KMRC3_KIDNEY                      | pralatrexate           | 148121    | 0.101050836 |
| ACH-000222 | ASPC1_PANCREAS                    | fluocinolone-acetonide | 6215      | 0.101072668 |
| ACH-000847 | HGC27_STOMACH                     | litronesib             | 25167017  | 0.101144707 |
| ACH-000408 | TE5_OESOPHAGUS                    | rigosertib             | 6918736   | 0.10115167  |
| ACH-000318 | TE10_OESOPHAGUS                   | vinflunine             | 11967282  | 0.101159929 |
| ACH-000787 | LXF289_LUNG                       | CYT-997                | 11351021  | 0.101210833 |
| ACH-000102 | GMS10_CENTRAL_NERVOUS_SYSTEM      | BI-2536                | 11364421  | 0.101246033 |
| ACH-000368 | SNU1105_CENTRAL_NERVOUS_SYSTEM    | idasanutlin            | 53358942  | 0.101337195 |
| ACH-000845 | NCIH1373_LUNG                     | litronesib             | 25167017  | 0.101375163 |
| ACH-000503 | BICR16_UPPER_AERODIGESTIVE_TRACT  | ingenol-mebutate       | 6918670   | 0.10152361  |
| ACH-000384 | SW780_URINARY_TRACT               | ganetespib             | 135564985 | 0.101535235 |
| ACH-000023 | PATU8988T_PANCREAS                | temsirolimus           | 129009966 | 0.101560546 |
| ACH-000674 | NUGC4_STOMACH                     | temoporfin             | 60751     | 0.10160077  |
| ACH-000209 | SNU1079_BILIARY_TRACT             | pralatrexate           | 148121    | 0.101613481 |
| ACH-000219 | A375_SKIN                         | tanespimycin           | 6505803   | 0.101629308 |
| ACH-000796 | MCAS_OVARY                        | SNS-314                | 24995524  | 0.101634507 |
| ACH-000750 | LOXIMV1_SKIN                      | temoporfin             | 60751     | 0.101645641 |
| ACH-000210 | CADOES1_BONE                      | alvespimycin           | 5288674   | 0.101708202 |

|            |                              |                  |           |             |
|------------|------------------------------|------------------|-----------|-------------|
| ACH-000558 | A172_CENTRAL_NERVOUS_SYSTEM  | pralatrexate     | 148121    | 0.101717642 |
| ACH-000118 | HUPT3_PANCREAS               | ispinesib        | 6851740   | 0.101742048 |
| ACH-000804 | NB1_AUTONOMIC_GANGLIA        | temsirolimus     | 129009966 | 0.101786598 |
| ACH-000427 | NCIN87_STOMACH               | BAY-87-2243      | 67377767  | 0.101813541 |
| ACH-000869 | NCIH1568_LUNG                | ouabain          | 11527152  | 0.101815973 |
| ACH-000899 | WM88_SKIN                    | tanespimycin     | 6505803   | 0.101825022 |
| ACH-000479 | KNS81_CENTRAL_NERVOUS_SYSTEM | paclitaxel       | 36314     | 0.101828575 |
| ACH-000678 | MKN7_STOMACH                 | KX2-391          | 23635314  | 0.101921086 |
| ACH-000603 | BEN_LUNG                     | tanespimycin     | 6505803   | 0.101985404 |
| ACH-000266 | SNU213_PANCREAS              | tanespimycin     | 6505803   | 0.102009914 |
| ACH-000958 | SW48_LARGE_INTESTINE         | BAY-87-2243      | 67377767  | 0.10202614  |
| ACH-000311 | NCIH2122_LUNG                | panobinostat     | 6918837   | 0.102222699 |
| ACH-000296 | OUMS23_LARGE_INTESTINE       | paclitaxel       | 36314     | 0.102329913 |
| ACH-000449 | MESSA_SOFT_TISSUE            | litronesib       | 25167017  | 0.102330411 |
| ACH-000997 | HCT15_LARGE_INTESTINE        | temsirolimus     | 129009966 | 0.102384254 |
| ACH-000417 | PANC0813_PANCREAS            | ispinesib        | 6851740   | 0.102405367 |
| ACH-000222 | ASPC1_PANCREAS               | paclitaxel       | 36314     | 0.102430743 |
| ACH-000827 | WM793_SKIN                   | mubritinib       | 6444692   | 0.102438253 |
| ACH-000845 | NCIH1373_LUNG                | ingenol-mebutate | 6918670   | 0.102455127 |
| ACH-000502 | TCCPAN2_PANCREAS             | BNC105           | 24786555  | 0.102457969 |
| ACH-000613 | HOS_BONE                     | temsirolimus     | 129009966 | 0.10256568  |
| ACH-000785 | NCIH2126_LUNG                | temsirolimus     | 129009966 | 0.10258854  |
| ACH-000270 | HPAC_PANCREAS                | paclitaxel       | 36314     | 0.102618872 |
| ACH-000625 | HEP3B217_LIVER               | tanespimycin     | 6505803   | 0.102657005 |
| ACH-000570 | YKG1_CENTRAL_NERVOUS_SYSTEM  | elesclomol       | 300471    | 0.102679248 |
| ACH-000955 | SNU407_LARGE_INTESTINE       | litronesib       | 25167017  | 0.10271558  |
| ACH-000796 | MCAS_OVARY                   | temoporfin       | 60751     | 0.102734404 |
| ACH-000159 | OSRC2_KIDNEY                 | elesclomol       | 300471    | 0.102769358 |
| ACH-000427 | NCIN87_STOMACH               | pralatrexate     | 148121    | 0.102827666 |
| ACH-000308 | EFO21_OVARY                  | ingenol-mebutate | 6918670   | 0.102842187 |
| ACH-000309 | SKLU1_LUNG                   | filanesib        | 44224257  | 0.102874721 |
| ACH-000791 | RERFLCAD1_LUNG               | MLN0128          | 45375953  | 0.102889305 |
| ACH-000787 | LXF289_LUNG                  | KX2-391          | 23635314  | 0.102932991 |
| ACH-000266 | SNU213_PANCREAS              | vindesine        | 40839     | 0.102935086 |
| ACH-000102 | GMS10_CENTRAL_NERVOUS_SYSTEM | CYT-997          | 11351021  | 0.103036383 |
| ACH-000332 | YAPC_PANCREAS                | vinflunine       | 11967282  | 0.103051817 |
| ACH-000123 | COV434_OVARY                 | temsirolimus     | 129009966 | 0.103099395 |
| ACH-000344 | SNU668_STOMACH               | pralatrexate     | 148121    | 0.103144572 |
| ACH-000599 | PATU8902_PANCREAS            | temsirolimus     | 129009966 | 0.103309825 |
| ACH-000468 | PK45H_PANCREAS               | MPI-0479605      | 46909588  | 0.103313307 |
| ACH-000054 | HT1080_SOFT_TISSUE           | barasertib-HQPA  | 16007391  | 0.103337853 |
| ACH-000900 | NCIH23_LUNG                  | NVP-BE2235       | 11977753  | 0.103391973 |
| ACH-000968 | COLO792_SKIN                 | raltitrexed      | 135400182 | 0.103525646 |

|            |                                 |                  |           |             |
|------------|---------------------------------|------------------|-----------|-------------|
| ACH-000832 | CAL27_UPPER_AERODIGESTIVE_TRACT | temoporfin       | 60751     | 0.103527598 |
| ACH-000927 | BT474_BREAST                    | alvespimycin     | 5288674   | 0.103594501 |
| ACH-000822 | SKMEL24_SKIN                    | KX2-391          | 23635314  | 0.103595518 |
| ACH-000048 | TOV112D_OVARY                   | temoporfin       | 60751     | 0.103669723 |
| ACH-000562 | HCC78_LUNG                      | litronesib       | 25167017  | 0.103790704 |
| ACH-000759 | MDAMB175VII_BREAST              | poziotinib       | 25127713  | 0.103822208 |
| ACH-000909 | JHUEM2_ENDOMETRIUM              | rigosertib       | 6918736   | 0.103899849 |
| ACH-000563 | EBC1_LUNG                       | elesclomol       | 300471    | 0.103905352 |
| ACH-000329 | CCFSTTG1_CENTRAL_NERVOUS_SYSTEM | BNC105           | 24786555  | 0.104079674 |
| ACH-000209 | SNU1079_BILIARY_TRACT           | paclitaxel       | 36314     | 0.10409609  |
| ACH-000018 | T24_URINARY_TRACT               | paclitaxel       | 36314     | 0.104118465 |
| ACH-000376 | SF295_CENTRAL_NERVOUS_SYSTEM    | docetaxel        | 148124    | 0.104129536 |
| ACH-000730 | SKMEL5_SKIN                     | temsirolimus     | 129009966 | 0.104285163 |
| ACH-000322 | HT144_SKIN                      | NVP-BEZ235       | 11977753  | 0.10429517  |
| ACH-000428 | UO31_KIDNEY                     | filanesib        | 44224257  | 0.104328523 |
| ACH-000665 | SKMES1_LUNG                     | ingenol-mebutate | 6918670   | 0.104376929 |
| ACH-000967 | SNUC2A_LARGE_INTESTINE          | D-64131          | 3921152   | 0.104398322 |
| ACH-000296 | OUMS23_LARGE_INTESTINE          | pralatrexate     | 148121    | 0.104586547 |
| ACH-000153 | NCIH2052_PLEURA                 | TAK-733          | 24963252  | 0.104609036 |
| ACH-000420 | SNU449_LIVER                    | temsirolimus     | 129009966 | 0.104617544 |
| ACH-000062 | RERFLCMS_LUNG                   | temoporfin       | 60751     | 0.10465452  |
| ACH-000161 | CORL105_LUNG                    | paclitaxel       | 36314     | 0.10465554  |
| ACH-000579 | UACC257_SKIN                    | BI-2536          | 11364421  | 0.104728397 |
| ACH-000802 | BFTC905_URINARY_TRACT           | pralatrexate     | 148121    | 0.104731903 |
| ACH-000566 | SW1710_URINARY_TRACT            | idasanutlin      | 53358942  | 0.104738808 |
| ACH-000765 | WM983B_SKIN                     | vincristine      | 5388993   | 0.104849296 |
| ACH-000836 | YD15_SALIVARY_GLAND             | ingenol-mebutate | 6918670   | 0.104880065 |
| ACH-000266 | SNU213_PANCREAS                 | NVP-AUY922       | 135539077 | 0.104934549 |
| ACH-000688 | OV7_OVARY                       | ingenol-mebutate | 6918670   | 0.104950869 |
| ACH-000351 | MKN1_STOMACH                    | idasanutlin      | 53358942  | 0.104981965 |
| ACH-000441 | SH4_SKIN                        | mubritinib       | 6444692   | 0.104982873 |
| ACH-000991 | SNU81_LARGE_INTESTINE           | ispinesib        | 6851740   | 0.10498491  |
| ACH-000971 | HCT116_LARGE_INTESTINE          | temsirolimus     | 129009966 | 0.104996568 |
| ACH-000984 | HEC6_ENDOMETRIUM                | tanespimycin     | 6505803   | 0.105099134 |
| ACH-000662 | CORL23_LUNG                     | elesclomol       | 300471    | 0.105129308 |
| ACH-000376 | SF295_CENTRAL_NERVOUS_SYSTEM    | tanespimycin     | 6505803   | 0.105152971 |
| ACH-000231 | KALS1_CENTRAL_NERVOUS_SYSTEM    | rigosertib       | 6918736   | 0.105205107 |
| ACH-000408 | TE5_OESOPHAGUS                  | pralatrexate     | 148121    | 0.105207224 |
| ACH-000189 | RCC10RGB_KIDNEY                 | paclitaxel       | 36314     | 0.1052272   |
| ACH-000277 | HCC1419_BREAST                  | pralatrexate     | 148121    | 0.105302019 |
| ACH-000924 | NCIH2172_LUNG                   | everolimus       | 6442177   | 0.105317063 |
| ACH-000716 | TT2609C02_THYROID               | temsirolimus     | 129009966 | 0.105375251 |
| ACH-000605 | TE6_OESOPHAGUS                  | temoporfin       | 60751     | 0.105405753 |

|            |                                |                  |           |             |
|------------|--------------------------------|------------------|-----------|-------------|
| ACH-000302 | SNU1077_ENDOMETRIUM            | docetaxel        | 148124    | 0.105445137 |
| ACH-000302 | SNU1077_ENDOMETRIUM            | alvespimycin     | 5288674   | 0.105467976 |
| ACH-000984 | HEC6_ENDOMETRIUM               | pralatrexate     | 148121    | 0.105523917 |
| ACH-000657 | A2780_OVARY                    | irinotecan       | 60838     | 0.10552395  |
| ACH-000936 | EFO27_OVARY                    | pralatrexate     | 148121    | 0.105563279 |
| ACH-000758 | MKN74_STOMACH                  | cephalomannine   | 6436208   | 0.105582867 |
| ACH-000758 | MKN74_STOMACH                  | vindesine        | 40839     | 0.105609395 |
| ACH-000970 | SNUC5_LARGE_INTESTINE          | alvespimycin     | 5288674   | 0.105609553 |
| ACH-000527 | OVI5E_OVARY                    | BAY-87-2243      | 67377767  | 0.105623612 |
| ACH-000397 | TEN_ENDOMETRIUM                | irinotecan       | 60838     | 0.105625231 |
| ACH-000628 | NCIH596_LUNG                   | ingenol-mebutate | 6918670   | 0.105664572 |
| ACH-000561 | TT_OESOPHAGUS                  | barasertib-HQPA  | 16007391  | 0.105703381 |
| ACH-000674 | NUGC4_STOMACH                  | NVP-BEZ235       | 11977753  | 0.105711945 |
| ACH-000778 | HSC3_UPPER_AERODIGESTIVE_TRACT | litronesib       | 25167017  | 0.105713989 |
| ACH-000810 | SKMEL30_SKIN                   | BI-2536          | 11364421  | 0.105720659 |
| ACH-000007 | LS513_LARGE_INTESTINE          | tanespimycin     | 6505803   | 0.105746466 |
| ACH-000974 | SNGM_ENDOMETRIUM               | everolimus       | 6442177   | 0.105994736 |
| ACH-000274 | HS852T_SKIN                    | FK-866           | 6914657   | 0.106048323 |
| ACH-000139 | PANC0327_PANCREAS              | piperazine       | 4837      | 0.106061274 |
| ACH-000434 | NCIH1915_LUNG                  | ingenol-mebutate | 6918670   | 0.106065408 |
| ACH-000018 | T24_URINARY_TRACT              | pralatrexate     | 148121    | 0.106088315 |
| ACH-000332 | YAPC_PANCREAS                  | elesclomol       | 300471    | 0.106161493 |
| ACH-000174 | CAL62_THYROID                  | MLN0128          | 45375953  | 0.106256296 |
| ACH-000359 | MG63_BONE                      | tanespimycin     | 6505803   | 0.106279678 |
| ACH-000603 | BEN_LUNG                       | temsirolimus     | 129009966 | 0.10644726  |
| ACH-000880 | AGS_STOMACH                    | litronesib       | 25167017  | 0.106603629 |
| ACH-000425 | UACC62_SKIN                    | temsirolimus     | 129009966 | 0.106637863 |
| ACH-000335 | MSTO211H_PLEURA                | temsirolimus     | 129009966 | 0.106642221 |
| ACH-000921 | NCIH1339_LUNG                  | ingenol-mebutate | 6918670   | 0.106739315 |
| ACH-000542 | HEYA8_OVARY                    | elesclomol       | 300471    | 0.106780708 |
| ACH-000244 | DKMG_CENTRAL_NERVOUS_SYSTEM    | ispinesib        | 6851740   | 0.106801503 |
| ACH-000484 | VMRCRCW_KIDNEY                 | pralatrexate     | 148121    | 0.106880381 |
| ACH-000107 | CAPAN2_PANCREAS                | ingenol-mebutate | 6918670   | 0.106961687 |
| ACH-000484 | VMRCRCW_KIDNEY                 | filanesib        | 44224257  | 0.106984771 |
| ACH-000274 | HS852T_SKIN                    | alvespimycin     | 5288674   | 0.10703377  |
| ACH-000222 | ASPC1_PANCREAS                 | tanespimycin     | 6505803   | 0.10704107  |
| ACH-000324 | JHOC5_OVARY                    | rigosertib       | 6918736   | 0.107219314 |
| ACH-000880 | AGS_STOMACH                    | tanespimycin     | 6505803   | 0.10732169  |
| ACH-000532 | SNU61_LARGE_INTESTINE          | ingenol-mebutate | 6918670   | 0.107329239 |
| ACH-000384 | SW780_URINARY_TRACT            | BI-2536          | 11364421  | 0.107397467 |
| ACH-000159 | OSRC2_KIDNEY                   | KX2-391          | 23635314  | 0.107466811 |
| ACH-000447 | NCIH2228_LUNG                  | ispinesib        | 6851740   | 0.107469969 |
| ACH-000749 | DMS273_LUNG                    | idasanutlin      | 53358942  | 0.107488061 |

|            |                                  |                    |           |             |
|------------|----------------------------------|--------------------|-----------|-------------|
| ACH-000628 | NCIH596_LUNG                     | GSK461364          | 15983966  | 0.107541938 |
| ACH-000800 | NCIH446_LUNG                     | irinotecan         | 60838     | 0.107565594 |
| ACH-000957 | LS180_LARGE_INTESTINE            | pralatrexate       | 148121    | 0.107569263 |
| ACH-000842 | SW480_LARGE_INTESTINE            | trametinib         | 11707110  | 0.107637618 |
| ACH-000012 | HCC827_LUNG                      | rigosertib         | 6918736   | 0.107749123 |
| ACH-000957 | LS180_LARGE_INTESTINE            | paclitaxel         | 36314     | 0.107755075 |
| ACH-000384 | SW780_URINARY_TRACT              | tanespimycin       | 6505803   | 0.107939564 |
| ACH-000939 | SKUT1_SOFT_TISSUE                | temoporfin         | 60751     | 0.107954086 |
| ACH-000943 | RKO_LARGE_INTESTINE              | NVP-BE235          | 11977753  | 0.10797141  |
| ACH-000730 | SKMEL5_SKIN                      | trametinib         | 11707110  | 0.107981626 |
| ACH-000657 | A2780_OVARY                      | temoporfin         | 60751     | 0.107984375 |
| ACH-000425 | UACC62_SKIN                      | piperazine         | 4837      | 0.107990561 |
| ACH-000994 | HEC59_ENDOMETRIUM                | litronesib         | 25167017  | 0.108054472 |
| ACH-000046 | ACHN_KIDNEY                      | litronesib         | 25167017  | 0.108078674 |
| ACH-000471 | LI7_LIVER                        | ingenol-mebutate   | 6918670   | 0.108088153 |
| ACH-000427 | NCIN87_STOMACH                   | combretastatin-A-4 | 5351344   | 0.108099467 |
| ACH-000320 | PSN1_PANCREAS                    | idasanutlin        | 53358942  | 0.108131887 |
| ACH-000403 | NCIH747_LARGE_INTESTINE          | docetaxel          | 148124    | 0.108235084 |
| ACH-000652 | SUIT2_PANCREAS                   | pralatrexate       | 148121    | 0.108353091 |
| ACH-000766 | NCIH1648_LUNG                    | piperazine         | 4837      | 0.108368673 |
| ACH-000924 | NCIH2172_LUNG                    | GSK461364          | 15983966  | 0.108447797 |
| ACH-000102 | GMS10_CENTRAL_NERVOUS_SYSTEM     | ingenol-mebutate   | 6918670   | 0.108490074 |
| ACH-000008 | A101D_SKIN                       | piperazine         | 4837      | 0.108520659 |
| ACH-000123 | COV434_OVARY                     | NVP-BE235          | 11977753  | 0.10857769  |
| ACH-000863 | DBTRG05MG_CENTRAL_NERVOUS_SYSTEM | elesclomol         | 300471    | 0.108594995 |
| ACH-000868 | HCC1195_LUNG                     | D-64131            | 3921152   | 0.108614658 |
| ACH-000437 | SW1088_CENTRAL_NERVOUS_SYSTEM    | temsirolimus       | 129009966 | 0.108618243 |
| ACH-000351 | MKN1_STOMACH                     | piperazine         | 4837      | 0.108706124 |
| ACH-000766 | NCIH1648_LUNG                    | NVP-BE235          | 11977753  | 0.108725936 |
| ACH-000159 | OSRC2_KIDNEY                     | BNC105             | 24786555  | 0.10873119  |
| ACH-000804 | NB1_AUTONOMIC_GANGLIA            | ingenol-mebutate   | 6918670   | 0.108738598 |
| ACH-000674 | NUGC4_STOMACH                    | MLN0128            | 45375953  | 0.108761535 |
| ACH-000669 | SW900_LUNG                       | pralatrexate       | 148121    | 0.108763757 |
| ACH-000389 | H4_CENTRAL_NERVOUS_SYSTEM        | elesclomol         | 300471    | 0.108764441 |
| ACH-000845 | NCIH1373_LUNG                    | ispinesib          | 6851740   | 0.108801293 |
| ACH-000164 | PANC1_PANCREAS                   | LY2606368          | 46700756  | 0.108823969 |
| ACH-000277 | HCC1419_BREAST                   | verubulin          | 11414799  | 0.10884778  |
| ACH-000528 | ABC1_LUNG                        | piperazine         | 4837      | 0.108911778 |
| ACH-001075 | NCIH292_LUNG                     | litronesib         | 25167017  | 0.109016738 |
| ACH-000957 | LS180_LARGE_INTESTINE            | tanespimycin       | 6505803   | 0.109087051 |
| ACH-000954 | HEC1A_ENDOMETRIUM                | rigosertib         | 6918736   | 0.109133831 |
| ACH-000890 | SW1271_LUNG                      | ingenol-mebutate   | 6918670   | 0.109141601 |
| ACH-000018 | T24_URINARY_TRACT                | tanespimycin       | 6505803   | 0.10923703  |

|            |                                |                    |           |             |
|------------|--------------------------------|--------------------|-----------|-------------|
| ACH-000351 | MKN1_STOMACH                   | irinotecan         | 60838     | 0.109238378 |
| ACH-000458 | CJM_SKIN                       | elesclomol         | 300471    | 0.109244404 |
| ACH-000096 | G401_SOFT_TISSUE               | ingenol-mebutate   | 6918670   | 0.109276198 |
| ACH-000945 | NCIH650_LUNG                   | temsirolimus       | 129009966 | 0.109344048 |
| ACH-000941 | HEC1B_ENDOMETRIUM              | pralatrexate       | 148121    | 0.109351034 |
| ACH-000627 | LCLC103H_LUNG                  | temsirolimus       | 129009966 | 0.109464365 |
| ACH-000648 | NCIH28_PLEURA                  | docetaxel          | 148124    | 0.109491353 |
| ACH-000812 | COLO783_SKIN                   | everolimus         | 6442177   | 0.109522684 |
| ACH-000778 | HSC3_UPPER_AERODIGESTIVE_TRACT | idasanutlin        | 53358942  | 0.109593271 |
| ACH-000222 | ASPC1_PANCREAS                 | desonide           | 5311066   | 0.109608042 |
| ACH-000909 | JHUEM2_ENDOMETRIUM             | temoporfin         | 60751     | 0.109619085 |
| ACH-000141 | SNU308_BILIARY_TRACT           | tanespimycin       | 6505803   | 0.109629715 |
| ACH-000493 | SNU423_LIVER                   | piperazine         | 4837      | 0.109684769 |
| ACH-000614 | RVH421_SKIN                    | temsirolimus       | 129009966 | 0.109711914 |
| ACH-000778 | HSC3_UPPER_AERODIGESTIVE_TRACT | temoporfin         | 60751     | 0.10971407  |
| ACH-000678 | MKN7_STOMACH                   | CYT-997            | 11351021  | 0.109774747 |
| ACH-000062 | RERFLCMS_LUNG                  | temsirolimus       | 129009966 | 0.109851341 |
| ACH-000776 | ONS76_CENTRAL_NERVOUS_SYSTEM   | napabucasin        | 10331844  | 0.109882318 |
| ACH-000680 | SW948_LARGE_INTESTINE          | alvespimycin       | 5288674   | 0.109908597 |
| ACH-000808 | HUH28_BILIARY_TRACT            | tanespimycin       | 6505803   | 0.109925353 |
| ACH-000454 | HCC95_LUNG                     | pralatrexate       | 148121    | 0.11005072  |
| ACH-000482 | RERFLCKJ_LUNG                  | temoporfin         | 60751     | 0.110081814 |
| ACH-000142 | CAL29_URINARY_TRACT            | temoporfin         | 60751     | 0.110156233 |
| ACH-000274 | HS852T_SKIN                    | taltobulin         | 6918637   | 0.110163773 |
| ACH-000481 | NCIH2170_LUNG                  | ispinesib          | 6851740   | 0.110200033 |
| ACH-000565 | RCM1_LARGE_INTESTINE           | idasanutlin        | 53358942  | 0.110203748 |
| ACH-000352 | HCC1428_BREAST                 | filanesib          | 44224257  | 0.110241192 |
| ACH-001075 | NCIH292_LUNG                   | D-64131            | 3921152   | 0.110293806 |
| ACH-000991 | SNU81_LARGE_INTESTINE          | ingenol-mebutate   | 6918670   | 0.110305966 |
| ACH-000959 | SNUC4_LARGE_INTESTINE          | elesclomol         | 300471    | 0.11032144  |
| ACH-000997 | HCT15_LARGE_INTESTINE          | tanespimycin       | 6505803   | 0.110350217 |
| ACH-000765 | WM983B_SKIN                    | BI-2536            | 11364421  | 0.110365826 |
| ACH-000822 | SKMEL24_SKIN                   | pralatrexate       | 148121    | 0.110369339 |
| ACH-000480 | HUH7_LIVER                     | bortezomib         | 387447    | 0.110461337 |
| ACH-000913 | ESS1_ENDOMETRIUM               | BAY-87-2243        | 67377767  | 0.110466693 |
| ACH-000433 | CAK11_KIDNEY                   | combretastatin-A-4 | 5351344   | 0.110494309 |
| ACH-000738 | GB1_CENTRAL_NERVOUS_SYSTEM     | GSK461364          | 15983966  | 0.1105786   |
| ACH-000527 | OVISE_OVARY                    | ispinesib          | 6851740   | 0.110609486 |
| ACH-001321 | TT_THYROID                     | NVP-AUY922         | 135539077 | 0.110716352 |
| ACH-000921 | NCIH1339_LUNG                  | altretamine        | 2123      | 0.110790921 |
| ACH-000684 | KMRC1_KIDNEY                   | elesclomol         | 300471    | 0.110793977 |
| ACH-000186 | NCIH2444_LUNG                  | piperazine         | 4837      | 0.11088456  |
| ACH-000389 | H4_CENTRAL_NERVOUS_SYSTEM      | docetaxel          | 148124    | 0.110898363 |

|            |                                   |                    |           |             |
|------------|-----------------------------------|--------------------|-----------|-------------|
| ACH-000384 | SW780_URINARY_TRACT               | pralatrexate       | 148121    | 0.11090252  |
| ACH-000648 | NCIH28_PLEURA                     | BAY-87-2243        | 67377767  | 0.11106381  |
| ACH-000701 | RMUGS_OVARY                       | dinacliclib        | 46926350  | 0.111145469 |
| ACH-000433 | CAKII_KIDNEY                      | BNC105             | 24786555  | 0.111323357 |
| ACH-000994 | HEC59_ENDOMETRIUM                 | rigosertib         | 6918736   | 0.111327853 |
| ACH-000605 | TE6_OESOPHAGUS                    | irinotecan         | 60838     | 0.111373301 |
| ACH-000549 | SNU1076_UPPER_AERODIGESTIVE_TRACT | BI-2536            | 11364421  | 0.111375052 |
| ACH-000681 | A549_LUNG                         | vinorelbine        | 5388993   | 0.111433636 |
| ACH-000846 | FADU_UPPER_AERODIGESTIVE_TRACT    | temoporfin         | 60751     | 0.11145129  |
| ACH-000885 | TOV21G_OVARY                      | talazoparib        | 135565082 | 0.111567395 |
| ACH-000428 | UO31_KIDNEY                       | raltitrexed        | 135400182 | 0.111567956 |
| ACH-000599 | PATU8902_PANCREAS                 | elesclomol         | 300471    | 0.111618949 |
| ACH-000270 | HPAC_PANCREAS                     | combretastatin-A-4 | 5351344   | 0.111631896 |
| ACH-000210 | CADOES1_BONE                      | BNC105             | 24786555  | 0.111637282 |
| ACH-000013 | ONCODG1_OVARY                     | temsirolimus       | 129009966 | 0.111669456 |
| ACH-000720 | TCCSUP_URINARY_TRACT              | ispinesib          | 6851740   | 0.111697469 |
| ACH-000396 | J82_URINARY_TRACT                 | temsirolimus       | 129009966 | 0.111715579 |
| ACH-000223 | HCC1937_BREAST                    | pralatrexate       | 148121    | 0.111752306 |
| ACH-000792 | BFTC909_KIDNEY                    | pralatrexate       | 148121    | 0.111792156 |
| ACH-000579 | UACC257_SKIN                      | tanespimycin       | 6505803   | 0.111950975 |
| ACH-000223 | HCC1937_BREAST                    | BNC105             | 24786555  | 0.111961092 |
| ACH-000376 | SF295_CENTRAL_NERVOUS_SYSTEM      | BAY-87-2243        | 67377767  | 0.111971861 |
| ACH-000495 | TUHR4TKB_KIDNEY                   | elesclomol         | 300471    | 0.112080422 |
| ACH-000480 | HUH7_LIVER                        | verubulin          | 11414799  | 0.112177258 |
| ACH-000972 | HEC151_ENDOMETRIUM                | ispinesib          | 6851740   | 0.112187184 |
| ACH-000990 | HEC108_ENDOMETRIUM                | ingenol-mebutate   | 6918670   | 0.112284015 |
| ACH-000967 | SNUC2A_LARGE_INTESTINE            | tanespimycin       | 6505803   | 0.112322457 |
| ACH-000404 | K029AX_SKIN                       | tanespimycin       | 6505803   | 0.112370024 |
| ACH-000736 | SNU601_STOMACH                    | MLN0128            | 45375953  | 0.11242618  |
| ACH-000899 | WM88_SKIN                         | paclitaxel         | 36314     | 0.112441297 |
| ACH-000921 | NCIH1339_LUNG                     | temsirolimus       | 129009966 | 0.112494749 |
| ACH-000630 | YD8_UPPER_AERODIGESTIVE_TRACT     | elesclomol         | 300471    | 0.112502732 |
| ACH-000651 | SW620_LARGE_INTESTINE             | NVP-BEZ235         | 11977753  | 0.112552887 |
| ACH-000765 | WM983B_SKIN                       | filanesib          | 44224257  | 0.112577089 |
| ACH-000868 | HCC1195_LUNG                      | GSK461364          | 15983966  | 0.112580406 |
| ACH-000895 | CL34_LARGE_INTESTINE              | temoporfin         | 60751     | 0.112595615 |
| ACH-000774 | RERFLCAD2_LUNG                    | docetaxel          | 148124    | 0.112660232 |
| ACH-000480 | HUH7_LIVER                        | filanesib          | 44224257  | 0.112672078 |
| ACH-000320 | PSN1_PANCREAS                     | temoporfin         | 60751     | 0.112824123 |
| ACH-000469 | YH13_CENTRAL_NERVOUS_SYSTEM       | temsirolimus       | 129009966 | 0.112961557 |
| ACH-000625 | HEP3B217_LIVER                    | temsirolimus       | 129009966 | 0.113010993 |
| ACH-000941 | HEC1B_ENDOMETRIUM                 | filanesib          | 44224257  | 0.113021135 |
| ACH-000863 | DBTRG05MG_CENTRAL_NERVOUS_SYSTEM  | temoporfin         | 60751     | 0.113032335 |

|            |                                           |                                      |           |             |
|------------|-------------------------------------------|--------------------------------------|-----------|-------------|
| ACH-000880 | AGS_STOMACH                               | vinflunine                           | 11967282  | 0.113035391 |
| ACH-000674 | NUGC4_STOMACH                             | piperazine                           | 4837      | 0.113037629 |
| ACH-000237 | JHOM1_OVARY                               | temsirolimus                         | 129009966 | 0.113064449 |
| ACH-000886 | NCIH2009_LUNG                             | temsirolimus                         | 129009966 | 0.113098581 |
| ACH-000035 | NCIH1650_LUNG                             | floxuridine                          | 5702211   | 0.113123273 |
| ACH-000331 | ISTMES2_PLEURA                            | FK-866                               | 6914657   | 0.113130011 |
| ACH-000785 | NCIH2126_LUNG                             | ingenol-mebutate                     | 6918670   | 0.113134447 |
| ACH-000335 | MSTO211H_PLEURA                           | NVP-BEZ235                           | 11977753  | 0.113148308 |
| ACH-000133 | HS729_SOFT_TISSUE                         | BMS-626529                           | 11317439  | 0.113187268 |
| ACH-000732 | PECAPJ41CLONED2_UPPER_AERODIGESTIVE_TRACT | ingenol-mebutate                     | 6918670   | 0.113187828 |
| ACH-000991 | SNU81_LARGE_INTESTINE                     | litronesib                           | 25167017  | 0.113233822 |
| ACH-000307 | PK1_PANCREAS                              | temsirolimus                         | 129009966 | 0.113330648 |
| ACH-000305 | ECG10_OESOPHAGUS                          | tosedostat                           | 15547703  | 0.113331031 |
| ACH-000939 | SKUT1_SOFT_TISSUE                         | piperazine                           | 4837      | 0.113354491 |
| ACH-000209 | SNU1079_BILIARY_TRACT                     | CYT-997                              | 11351021  | 0.113478945 |
| ACH-000768 | MDAMB231_BREAST                           | tanespimycin                         | 6505803   | 0.11350801  |
| ACH-000945 | NCIH650_LUNG                              | dasatinib                            | 3062316   | 0.113517929 |
| ACH-000826 | CAL12T_LUNG                               | vincristine                          | 5388993   | 0.113649796 |
| ACH-000561 | TT_OESOPHAGUS                             | MLN0128                              | 45375953  | 0.113669651 |
| ACH-000018 | T24_URINARY_TRACT                         | ingenol-mebutate                     | 6918670   | 0.113766286 |
| ACH-000397 | TEN_ENDOMETRIUM                           | pralatrexate                         | 148121    | 0.113888766 |
| ACH-000900 | NCIH23_LUNG                               | ingenol-mebutate                     | 6918670   | 0.113942906 |
| ACH-000423 | SKMEL3_SKIN                               | vincristine                          | 5388993   | 0.113984755 |
| ACH-000133 | HS729_SOFT_TISSUE                         | ispinesib                            | 6851740   | 0.11402282  |
| ACH-000774 | RERFLCAD2_LUNG                            | tanespimycin                         | 6505803   | 0.114024514 |
| ACH-000643 | HDQP1_BREAST                              | litronesib                           | 25167017  | 0.114054821 |
| ACH-000270 | HPAC_PANCREAS                             | pralatrexate                         | 148121    | 0.11408623  |
| ACH-000209 | SNU1079_BILIARY_TRACT                     | 12-O-tetradecanoylphorbol-13-acetate | 27924     | 0.114201561 |
| ACH-000736 | SNU601_STOMACH                            | rigosertib                           | 6918736   | 0.11425945  |
| ACH-000316 | SNU886_LIVER                              | idasanutlin                          | 53358942  | 0.11426165  |
| ACH-000670 | SBC5_LUNG                                 | temoporfin                           | 60751     | 0.11435027  |
| ACH-000774 | RERFLCAD2_LUNG                            | BAY-87-2243                          | 67377767  | 0.114391028 |
| ACH-000318 | TE10_OESOPHAGUS                           | D-64131                              | 3921152   | 0.114434507 |
| ACH-000066 | HCC4006_LUNG                              | AZD8931                              | 11488320  | 0.114486081 |
| ACH-000897 | FTC238_THYROID                            | temsirolimus                         | 129009966 | 0.114544132 |
| ACH-000897 | FTC238_THYROID                            | tanespimycin                         | 6505803   | 0.114564261 |
| ACH-000496 | NCIH1792_LUNG                             | cobimetinib                          | 16222096  | 0.114567979 |
| ACH-000155 | SW1990_PANCREAS                           | idasanutlin                          | 53358942  | 0.114577    |
| ACH-000628 | NCIH596_LUNG                              | temsirolimus                         | 129009966 | 0.11458604  |
| ACH-000384 | SW780_URINARY_TRACT                       | BNC105                               | 24786555  | 0.11463689  |
| ACH-000278 | COV362_OVARY                              | litronesib                           | 25167017  | 0.114648403 |
| ACH-000500 | SNU46_UPPER_AERODIGESTIVE_TRACT           | tanespimycin                         | 6505803   | 0.114697577 |
| ACH-001318 | PLCPRF5_LIVER                             | 7-aminocephalosporanic-acid          | 441328    | 0.114723808 |

|            |                                   |                  |           |             |
|------------|-----------------------------------|------------------|-----------|-------------|
| ACH-000837 | NCIH322_LUNG                      | litronesib       | 25167017  | 0.114749108 |
| ACH-000232 | U251MG_CENTRAL_NERVOUS_SYSTEM     | NVP-BEZ235       | 11977753  | 0.114755862 |
| ACH-000553 | SQ1_LUNG                          | litronesib       | 25167017  | 0.115007017 |
| ACH-000408 | TE5_OESOPHAGUS                    | MPI-0479605      | 46909588  | 0.115086891 |
| ACH-000228 | BICR31_UPPER_AERODIGESTIVE_TRACT  | rigosertib       | 6918736   | 0.115124736 |
| ACH-000542 | HEYA8_OVARY                       | NVP-BEZ235       | 11977753  | 0.115160792 |
| ACH-000849 | MDAMB468_BREAST                   | litronesib       | 25167017  | 0.115207108 |
| ACH-000945 | NCIH650_LUNG                      | idasanutlin      | 53358942  | 0.115282736 |
| ACH-000118 | HUPT3_PANCREAS                    | elesclomol       | 300471    | 0.115361015 |
| ACH-000759 | MDAMB175VII_BREAST                | epothilone-b     | 129010071 | 0.115376037 |
| ACH-000133 | HS729_SOFT_TISSUE                 | everolimus       | 6442177   | 0.115410204 |
| ACH-000444 | LU99_LUNG                         | tosedostat       | 15547703  | 0.115511142 |
| ACH-000014 | HS294T_SKIN                       | tanespimycin     | 6505803   | 0.115511487 |
| ACH-000704 | OAW42_OVARY                       | tanespimycin     | 6505803   | 0.115575144 |
| ACH-000713 | CAOV3_OVARY                       | rigosertib       | 6918736   | 0.115691017 |
| ACH-000393 | HLF_LIVER                         | altretamine      | 2123      | 0.115728979 |
| ACH-000720 | TCCSUP_URINARY_TRACT              | ingenol-mebutate | 6918670   | 0.115819192 |
| ACH-000133 | HS729_SOFT_TISSUE                 | idasanutlin      | 53358942  | 0.115844186 |
| ACH-000471 | LI7_LIVER                         | temsirolimus     | 129009966 | 0.11586     |
| ACH-000669 | SW900_LUNG                        | elesclomol       | 300471    | 0.115883473 |
| ACH-000579 | UACC257_SKIN                      | vincristine      | 5388993   | 0.115910595 |
| ACH-000869 | NCIH1568_LUNG                     | rigosertib       | 6918736   | 0.115991461 |
| ACH-000696 | OVCAR8_OVARY                      | litronesib       | 25167017  | 0.116041849 |
| ACH-000592 | TM31_CENTRAL_NERVOUS_SYSTEM       | vindesine        | 40839     | 0.116063991 |
| ACH-000609 | SF126_CENTRAL_NERVOUS_SYSTEM      | tanespimycin     | 6505803   | 0.116065423 |
| ACH-000945 | NCIH650_LUNG                      | temoporfin       | 60751     | 0.116141377 |
| ACH-000774 | RERFLCAD2_LUNG                    | paclitaxel       | 36314     | 0.116193246 |
| ACH-000826 | CAL12T_LUNG                       | BI-2536          | 11364421  | 0.116259389 |
| ACH-000990 | HEC108_ENDOMETRIUM                | ouabain          | 11527152  | 0.116278813 |
| ACH-000139 | PANC0327_PANCREAS                 | temoporfin       | 60751     | 0.116311045 |
| ACH-000176 | LOUNH91_LUNG                      | AS-703026        | 44187362  | 0.116335104 |
| ACH-000715 | SNU1214_UPPER_AERODIGESTIVE_TRACT | ingenol-mebutate | 6918670   | 0.11638962  |
| ACH-000364 | U2OS_BONE                         | tanespimycin     | 6505803   | 0.116398986 |
| ACH-000976 | HUCCT1_BILIARY_TRACT              | ispinesib        | 6851740   | 0.116455829 |
| ACH-000843 | HARA_LUNG                         | tosedostat       | 15547703  | 0.116518358 |
| ACH-000836 | YD15_SALIVARY_GLAND               | GSK461364        | 15983966  | 0.116563544 |
| ACH-000243 | DANG_PANCREAS                     | temoporfin       | 60751     | 0.11656555  |
| ACH-000274 | HS852T_SKIN                       | NSC-319726       | 5921672   | 0.116592565 |
| ACH-000118 | HUPT3_PANCREAS                    | idasanutlin      | 53358942  | 0.116606218 |
| ACH-000102 | GMS10_CENTRAL_NERVOUS_SYSTEM      | GSK461364        | 15983966  | 0.116649732 |
| ACH-000147 | T47D_BREAST                       | tanespimycin     | 6505803   | 0.116686679 |
| ACH-000022 | PATU8988S_PANCREAS                | filanesib        | 44224257  | 0.116694932 |
| ACH-000939 | SKUT1_SOFT_TISSUE                 | altretamine      | 2123      | 0.116733021 |

|            |                               |                                      |           |             |
|------------|-------------------------------|--------------------------------------|-----------|-------------|
| ACH-000178 | HS766T_PANCREAS               | cobimetinib                          | 16222096  | 0.116739213 |
| ACH-000389 | H4_CENTRAL_NERVOUS_SYSTEM     | ispinesib                            | 6851740   | 0.116781199 |
| ACH-000670 | SBC5_LUNG                     | tosedostat                           | 15547703  | 0.116822741 |
| ACH-000599 | PATU8902_PANCREAS             | ispinesib                            | 6851740   | 0.116836447 |
| ACH-000296 | OUMS23_LARGE_INTESTINE        | temsirolimus                         | 129009966 | 0.116968446 |
| ACH-000535 | BXPC3_PANCREAS                | vinblastine                          | 13342     | 0.116973134 |
| ACH-000738 | GB1_CENTRAL_NERVOUS_SYSTEM    | temsirolimus                         | 129009966 | 0.117003232 |
| ACH-000433 | CAK11_KIDNEY                  | paclitaxel                           | 36314     | 0.117051825 |
| ACH-000803 | COLO668_LUNG                  | elesclomol                           | 300471    | 0.117051853 |
| ACH-000189 | RCC10RGB_KIDNEY               | NVP-BEZ235                           | 11977753  | 0.117194437 |
| ACH-000488 | TE11_OESOPHAGUS               | temoporfin                           | 60751     | 0.117246767 |
| ACH-000744 | NCIH1623_LUNG                 | rigosertib                           | 6918736   | 0.117253244 |
| ACH-000985 | LS411N_LARGE_INTESTINE        | idasanutlin                          | 53358942  | 0.11728735  |
| ACH-000900 | NCIH23_LUNG                   | everolimus                           | 6442177   | 0.117298217 |
| ACH-000898 | SNU719_STOMACH                | litronesib                           | 25167017  | 0.117339269 |
| ACH-000163 | SW579_THYROID                 | dabrafenib                           | 44462760  | 0.117375899 |
| ACH-000941 | HEC1B_ENDOMETRIUM             | paclitaxel                           | 36314     | 0.117399431 |
| ACH-000704 | OAW42_OVARY                   | elesclomol                           | 300471    | 0.117408325 |
| ACH-000420 | SNU449_LIVER                  | paclitaxel                           | 36314     | 0.117440445 |
| ACH-000630 | YD8_UPPER_AERODIGESTIVE_TRACT | docetaxel                            | 148124    | 0.117458996 |
| ACH-000765 | WM983B_SKIN                   | GSK461364                            | 15983966  | 0.117482111 |
| ACH-000609 | SF126_CENTRAL_NERVOUS_SYSTEM  | NVP-BEZ235                           | 11977753  | 0.11757017  |
| ACH-000967 | SNUC2A_LARGE_INTESTINE        | ingenol-mebutate                     | 6918670   | 0.117593279 |
| ACH-000222 | ASPC1_PANCREAS                | litronesib                           | 25167017  | 0.117628223 |
| ACH-000277 | HCC1419_BREAST                | elesclomol                           | 300471    | 0.117641978 |
| ACH-000096 | G401_SOFT_TISSUE              | NVP-BEZ235                           | 11977753  | 0.117892289 |
| ACH-000139 | PANC0327_PANCREAS             | tipifamib                            | 159324    | 0.117934254 |
| ACH-000965 | RL952_ENDOMETRIUM             | NVP-BEZ235                           | 11977753  | 0.117938267 |
| ACH-000982 | GP2D_LARGE_INTESTINE          | temoporfin                           | 60751     | 0.117971459 |
| ACH-000389 | H4_CENTRAL_NERVOUS_SYSTEM     | ingenol-mebutate                     | 6918670   | 0.118046109 |
| ACH-000827 | WM793_SKIN                    | ispinesib                            | 6851740   | 0.118083879 |
| ACH-001321 | TT_THYROID                    | Ro-4987655                           | 11548630  | 0.11815912  |
| ACH-000749 | DMS273_LUNG                   | NVP-BEZ235                           | 11977753  | 0.118170356 |
| ACH-000452 | TE8_OESOPHAGUS                | KX2-391                              | 23635314  | 0.118202016 |
| ACH-000582 | COLO741_SKIN                  | ingenol-mebutate                     | 6918670   | 0.118236639 |
| ACH-000324 | JHOC5_OVARY                   | 12-O-tetradecanoylphorbol-13-acetate | 27924     | 0.118367551 |
| ACH-000561 | TT_OESOPHAGUS                 | temoporfin                           | 60751     | 0.118387504 |
| ACH-000429 | A704_KIDNEY                   | dinaciclib                           | 46926350  | 0.118451322 |
| ACH-000774 | RERFLCAD2_LUNG                | dinaciclib                           | 46926350  | 0.118456842 |
| ACH-000476 | JHH4_LIVER                    | paclitaxel                           | 36314     | 0.118513181 |
| ACH-000941 | HEC1B_ENDOMETRIUM             | ingenol-mebutate                     | 6918670   | 0.118523053 |
| ACH-000364 | U2OS_BONE                     | temoporfin                           | 60751     | 0.118535301 |
| ACH-000805 | COLO679_SKIN                  | litronesib                           | 25167017  | 0.118539428 |

|            |                                 |                             |           |             |
|------------|---------------------------------|-----------------------------|-----------|-------------|
| ACH-000669 | SW900_LUNG                      | altretamine                 | 2123      | 0.118641219 |
| ACH-000018 | T24_URINARY_TRACT               | AZD8330                     | 16666708  | 0.118643289 |
| ACH-000324 | JHOC5_OVARY                     | temsirolimus                | 129009966 | 0.118649498 |
| ACH-000176 | LOUNH91_LUNG                    | filanesib                   | 44224257  | 0.1186987   |
| ACH-000527 | OVI5E_OVARY                     | D-64131                     | 3921152   | 0.118801179 |
| ACH-000312 | SKNBE2_AUTONOMIC_GANGLIA        | tanespimycin                | 6505803   | 0.118867294 |
| ACH-000231 | KALS1_CENTRAL_NERVOUS_SYSTEM    | temsirolimus                | 129009966 | 0.118979352 |
| ACH-000868 | HCC1195_LUNG                    | AZD8330                     | 16666708  | 0.118991628 |
| ACH-000792 | BFTC909_KIDNEY                  | birinapant                  | 49836020  | 0.11899204  |
| ACH-000007 | LS513_LARGE_INTESTINE           | ingenol-mebutate            | 6918670   | 0.1190526   |
| ACH-000500 | SNU46_UPPER_AERODIGESTIVE_TRACT | everolimus                  | 6442177   | 0.119065249 |
| ACH-000985 | LS411N_LARGE_INTESTINE          | piperazine                  | 4837      | 0.119070489 |
| ACH-000587 | NCIH1975_LUNG                   | temsirolimus                | 129009966 | 0.119086359 |
| ACH-000899 | WM88_SKIN                       | filanesib                   | 44224257  | 0.119158409 |
| ACH-000701 | RMUGS_OVARY                     | pralatrexate                | 148121    | 0.119198801 |
| ACH-000421 | SW837_LARGE_INTESTINE           | idasanutlin                 | 53358942  | 0.11922179  |
| ACH-000759 | MDAMB175VII_BREAST              | ingenol-mebutate            | 6918670   | 0.119233773 |
| ACH-000418 | SW1353_BONE                     | pralatrexate                | 148121    | 0.119275512 |
| ACH-000147 | T47D_BREAST                     | litronesib                  | 25167017  | 0.11941418  |
| ACH-000368 | SNU1105_CENTRAL_NERVOUS_SYSTEM  | tanespimycin                | 6505803   | 0.119443254 |
| ACH-000472 | HSC2_UPPER_AERODIGESTIVE_TRACT  | GSK461364                   | 15983966  | 0.119457926 |
| ACH-000384 | SW780_URINARY_TRACT             | trametinib                  | 11707110  | 0.119514187 |
| ACH-000161 | CORL105_LUNG                    | elesclomol                  | 300471    | 0.119562479 |
| ACH-000351 | MKN1_STOMACH                    | NVP-BEZ235                  | 11977753  | 0.119724782 |
| ACH-000504 | SNB75_CENTRAL_NERVOUS_SYSTEM    | pralatrexate                | 148121    | 0.119807517 |
| ACH-000178 | HS766T_PANCREAS                 | raltitrexed                 | 135400182 | 0.11981294  |
| ACH-000042 | PANC0203_PANCREAS               | SNS-314                     | 24995524  | 0.119893787 |
| ACH-000278 | COV362_OVARY                    | rigosertib                  | 6918736   | 0.119898074 |
| ACH-000834 | UMUC1_URINARY_TRACT             | 7-aminocephalosporanic-acid | 441328    | 0.119920603 |
| ACH-000012 | HCC827_LUNG                     | tanespimycin                | 6505803   | 0.119983418 |
| ACH-000176 | LOUNH91_LUNG                    | pralatrexate                | 148121    | 0.119992828 |
| ACH-000189 | RCC10RGB_KIDNEY                 | SNS-314                     | 24995524  | 0.120118453 |
| ACH-000445 | KNS60_CENTRAL_NERVOUS_SYSTEM    | elesclomol                  | 300471    | 0.120121918 |
| ACH-000716 | TT2609C02_THYROID               | idasanutlin                 | 53358942  | 0.120147416 |
| ACH-000312 | SKNBE2_AUTONOMIC_GANGLIA        | temoporfin                  | 60751     | 0.120209292 |
| ACH-000954 | HEC1A_ENDOMETRIUM               | NVP-BEZ235                  | 11977753  | 0.120219249 |
| ACH-000132 | JHOS2_OVARY                     | elesclomol                  | 300471    | 0.12022111  |
| ACH-000277 | HCC1419_BREAST                  | MPI-0479605                 | 46909588  | 0.120247083 |
| ACH-000985 | LS411N_LARGE_INTESTINE          | litronesib                  | 25167017  | 0.120308036 |
| ACH-000979 | DUI45_PROSTATE                  | everolimus                  | 6442177   | 0.120355088 |
| ACH-000107 | CAPAN2_PANCREAS                 | vincristine                 | 5388993   | 0.120361889 |
| ACH-000060 | PANC1005_PANCREAS               | ispinesib                   | 6851740   | 0.120435856 |
| ACH-000813 | T3M10_LUNG                      | temoporfin                  | 60751     | 0.120438515 |

|            |                                  |                  |           |             |
|------------|----------------------------------|------------------|-----------|-------------|
| ACH-000863 | DBTRG05MG_CENTRAL_NERVOUS_SYSTEM | rigosertib       | 6918736   | 0.120440067 |
| ACH-000171 | VMRCRCZ_KIDNEY                   | floxuridine      | 5702211   | 0.120462017 |
| ACH-000147 | T47D_BREAST                      | volasertib       | 10461508  | 0.120537069 |
| ACH-000091 | OV56_OVARY                       | temoporfin       | 60751     | 0.120569136 |
| ACH-000445 | KNS60_CENTRAL_NERVOUS_SYSTEM     | piperazine       | 4837      | 0.120579681 |
| ACH-000650 | IGR37_SKIN                       | idasanutlin      | 53358942  | 0.120597544 |
| ACH-000335 | MSTO211H_PLEURA                  | temoporfin       | 60751     | 0.120629143 |
| ACH-000086 | ACCMESO1_PLEURA                  | everolimus       | 6442177   | 0.120637893 |
| ACH-000376 | SF295_CENTRAL_NERVOUS_SYSTEM     | KX2-391          | 23635314  | 0.120638699 |
| ACH-000164 | PANC1_PANCREAS                   | MPI-0479605      | 46909588  | 0.12064524  |
| ACH-000222 | ASPC1_PANCREAS                   | dasatinib        | 3062316   | 0.120664515 |
| ACH-000805 | COLO679_SKIN                     | NVP-BEZ235       | 11977753  | 0.12069177  |
| ACH-000277 | HCC1419_BREAST                   | pelitinib        | 6445562   | 0.120727872 |
| ACH-000758 | MKN74_STOMACH                    | BAY-87-2243      | 67377767  | 0.120743166 |
| ACH-000974 | SNGM_ENDOMETRIUM                 | dasatinib        | 3062316   | 0.120768492 |
| ACH-000917 | TE4_OESOPHAGUS                   | altretamine      | 2123      | 0.120784589 |
| ACH-000713 | CAOV3_OVARY                      | temoporfin       | 60751     | 0.120833707 |
| ACH-000264 | CALU6_LUNG                       | idasanutlin      | 53358942  | 0.120867069 |
| ACH-000384 | SW780_URINARY_TRACT              | vinblastine      | 13342     | 0.120883407 |
| ACH-001321 | TT_THYROID                       | TAK-733          | 24963252  | 0.120976592 |
| ACH-000496 | NCIH1792_LUNG                    | idasanutlin      | 53358942  | 0.121047645 |
| ACH-000107 | CAPAN2_PANCREAS                  | BNC105           | 24786555  | 0.12113219  |
| ACH-000209 | SNU1079_BILIARY_TRACT            | ingenol-mebutate | 6918670   | 0.121160178 |
| ACH-000473 | RT112_URINARY_TRACT              | idasanutlin      | 53358942  | 0.121165091 |
| ACH-000182 | SNU869_BILIARY_TRACT             | ingenol-mebutate | 6918670   | 0.121193097 |
| ACH-000846 | FADU_UPPER_AERODIGESTIVE_TRACT   | AT13387          | 11955716  | 0.121211383 |
| ACH-000517 | SNU410_PANCREAS                  | KX2-391          | 23635314  | 0.121256226 |
| ACH-000147 | T47D_BREAST                      | ispinesib        | 6851740   | 0.121411315 |
| ACH-000117 | EFM192A_BREAST                   | LY2606368        | 46700756  | 0.121469031 |
| ACH-000765 | WM983B_SKIN                      | pralatrexate     | 148121    | 0.121540374 |
| ACH-000791 | RERFLCAD1_LUNG                   | pralatrexate     | 148121    | 0.121545598 |
| ACH-000561 | TT_OESOPHAGUS                    | NVP-BEZ235       | 11977753  | 0.121646406 |
| ACH-000630 | YD8_UPPER_AERODIGESTIVE_TRACT    | filanesib        | 44224257  | 0.121646406 |
| ACH-000756 | GH1_CENTRAL_NERVOUS_SYSTEM       | temazepam        | 5391      | 0.121671233 |
| ACH-000717 | COLO680N_OESOPHAGUS              | litronesib       | 25167017  | 0.121682172 |
| ACH-000384 | SW780_URINARY_TRACT              | LY2606368        | 46700756  | 0.121685012 |
| ACH-000863 | DBTRG05MG_CENTRAL_NERVOUS_SYSTEM | temsirolimus     | 129009966 | 0.121717174 |
| ACH-000764 | SH10TC_STOMACH                   | piperazine       | 4837      | 0.121799056 |
| ACH-000936 | EFO27_OVARY                      | vindesine        | 40839     | 0.121802693 |
| ACH-000164 | PANC1_PANCREAS                   | pralatrexate     | 148121    | 0.12180276  |
| ACH-000929 | NCIH2110_LUNG                    | dasatinib        | 3062316   | 0.121803134 |
| ACH-000117 | EFM192A_BREAST                   | pralatrexate     | 148121    | 0.121842919 |
| ACH-000054 | HT1080_SOFT_TISSUE               | SNS-314          | 24995524  | 0.121934266 |

|            |                                |                    |           |             |
|------------|--------------------------------|--------------------|-----------|-------------|
| ACH-000318 | TE10_OESOPHAGUS                | floxuridine        | 5702211   | 0.121948046 |
| ACH-000717 | COLO680N_OESOPHAGUS            | ingenol-mebutate   | 6918670   | 0.122259301 |
| ACH-000270 | HPAC_PANCREAS                  | tanespimycin       | 6505803   | 0.122359816 |
| ACH-000266 | SNU213_PANCREAS                | ganetespib         | 135564985 | 0.122364989 |
| ACH-000450 | MELHO_SKIN                     | ispinesib          | 6851740   | 0.122403284 |
| ACH-000842 | SW480_LARGE_INTESTINE          | combretastatin-A-4 | 5351344   | 0.122428035 |
| ACH-000302 | SNU1077_ENDOMETRIUM            | filanesib          | 44224257  | 0.122482307 |
| ACH-000553 | SQ1_LUNG                       | piperazine         | 4837      | 0.122493925 |
| ACH-000563 | EBC1_LUNG                      | temoporfin         | 60751     | 0.122524452 |
| ACH-000756 | G11_CENTRAL_NERVOUS_SYSTEM     | volasertib         | 10461508  | 0.122531183 |
| ACH-000856 | CAL51_BREAST                   | temsirolimus       | 129009966 | 0.122634234 |
| ACH-000159 | OSRC2_KIDNEY                   | combretastatin-A-4 | 5351344   | 0.122664343 |
| ACH-000846 | FADU_UPPER_AERODIGESTIVE_TRACT | barasertib-HQPA    | 16007391  | 0.122665538 |
| ACH-000022 | PATU8988S_PANCREAS             | pralatrexate       | 148121    | 0.122823193 |
| ACH-000738 | GB1_CENTRAL_NERVOUS_SYSTEM     | paclitaxel         | 36314     | 0.122933435 |
| ACH-000946 | HEC265_ENDOMETRIUM             | SNS-314            | 24995524  | 0.122947404 |
| ACH-000781 | NCIH2023_LUNG                  | paclitaxel         | 36314     | 0.122980538 |
| ACH-000468 | PK45H_PANCREAS                 | combretastatin-A-4 | 5351344   | 0.123028771 |
| ACH-000359 | MG63_BONE                      | altretamine        | 2123      | 0.123044288 |
| ACH-001075 | NCIH292_LUNG                   | AS-703026          | 44187362  | 0.123046619 |
| ACH-000527 | OVI5E_OVARY                    | piperazine         | 4837      | 0.12305097  |
| ACH-000482 | RERFLCKJ_LUNG                  | navitoclax         | 24978538  | 0.123139546 |
| ACH-000927 | BT474_BREAST                   | colchicine         | 6167      | 0.1232354   |
| ACH-000414 | NCIH1944_LUNG                  | temoporfin         | 60751     | 0.123274985 |
| ACH-000082 | G292CLONEA141B1_BONE           | elesclomol         | 300471    | 0.123376606 |
| ACH-000810 | SKMEL30_SKIN                   | GSK461364          | 15983966  | 0.123434654 |
| ACH-000480 | HUH7_LIVER                     | toscdostat         | 15547703  | 0.123490819 |
| ACH-000965 | RL952_ENDOMETRIUM              | MLN0128            | 45375953  | 0.12366102  |
| ACH-000163 | SW579_THYROID                  | altretamine        | 2123      | 0.123712766 |
| ACH-000609 | SF126_CENTRAL_NERVOUS_SYSTEM   | idasanutlin        | 53358942  | 0.123817375 |
| ACH-000086 | ACCMESO1_PLEURA                | rigosertib         | 6918736   | 0.123913854 |
| ACH-000169 | RD_SOFT_TISSUE                 | idasanutlin        | 53358942  | 0.123918246 |
| ACH-000027 | GOS3_CENTRAL_NERVOUS_SYSTEM    | tanespimycin       | 6505803   | 0.123951972 |
| ACH-000929 | NCIH2110_LUNG                  | EVP4593            | 509554    | 0.124111943 |
| ACH-000652 | SUIT2_PANCREAS                 | combretastatin-A-4 | 5351344   | 0.124134631 |
| ACH-000630 | YD8_UPPER_AERODIGESTIVE_TRACT  | paclitaxel         | 36314     | 0.124206661 |
| ACH-000274 | HS852T_SKIN                    | vindesine          | 40839     | 0.12425679  |
| ACH-000800 | NCIH446_LUNG                   | tanespimycin       | 6505803   | 0.124258528 |
| ACH-000582 | COLO741_SKIN                   | EVP4593            | 509554    | 0.124317607 |
| ACH-000774 | RERFLCAD2_LUNG                 | elesclomol         | 300471    | 0.124365153 |
| ACH-000936 | EFO27_OVARY                    | CYT-997            | 11351021  | 0.124416852 |
| ACH-000082 | G292CLONEA141B1_BONE           | pralatrexate       | 148121    | 0.124516146 |
| ACH-000504 | SNB75_CENTRAL_NERVOUS_SYSTEM   | tanespimycin       | 6505803   | 0.124622336 |

|            |                                  |                             |           |             |
|------------|----------------------------------|-----------------------------|-----------|-------------|
| ACH-000614 | RVH421_SKIN                      | piperazine                  | 4837      | 0.124629367 |
| ACH-000759 | MDAMB175VII_BREAST               | cabazitaxel                 | 129009963 | 0.124635606 |
| ACH-000863 | DBTRG05MG_CENTRAL_NERVOUS_SYSTEM | piperazine                  | 4837      | 0.124672996 |
| ACH-000721 | HMC18_BREAST                     | dasatinib                   | 3062316   | 0.124690915 |
| ACH-000318 | TE10_OESOPHAGUS                  | MLN0128                     | 45375953  | 0.124707672 |
| ACH-000232 | U251MG_CENTRAL_NERVOUS_SYSTEM    | everolimus                  | 6442177   | 0.124794812 |
| ACH-000261 | RERFLCAI_LUNG                    | dasatinib                   | 3062316   | 0.124904478 |
| ACH-000701 | RMUGS_OVARY                      | docetaxel                   | 148124    | 0.124944187 |
| ACH-000862 | KMBC2_URINARY_TRACT              | piperazine                  | 4837      | 0.125024458 |
| ACH-000685 | L33_PANCREAS                     | 7-aminocephalosporanic-acid | 441328    | 0.125025165 |
| ACH-000562 | HCC78_LUNG                       | barasertib-HQPA             | 16007391  | 0.125030765 |
| ACH-000189 | RCC10RGB_KIDNEY                  | tanespimycin                | 6505803   | 0.125044698 |
| ACH-000878 | HCC15_LUNG                       | barasertib-HQPA             | 16007391  | 0.125068755 |
| ACH-000364 | U2OS_BONE                        | litronesib                  | 25167017  | 0.125072165 |
| ACH-000667 | HCC44_LUNG                       | temsirolimus                | 129009966 | 0.125133145 |
| ACH-000019 | MCF7_BREAST                      | litronesib                  | 25167017  | 0.12528133  |
| ACH-000684 | KMRC1_KIDNEY                     | NVP-BEZ235                  | 11977753  | 0.125314246 |
| ACH-000456 | BCPAP_THYROID                    | idasanutlin                 | 53358942  | 0.125324438 |
| ACH-000457 | CAL54_KIDNEY                     | filanesib                   | 44224257  | 0.125345466 |
| ACH-000788 | A2058_SKIN                       | piperazine                  | 4837      | 0.125350529 |
| ACH-000450 | MELHO_SKIN                       | elesclomol                  | 300471    | 0.125366664 |
| ACH-000532 | SNU61_LARGE_INTESTINE            | rigosertib                  | 6918736   | 0.125378595 |
| ACH-000950 | LOVO_LARGE_INTESTINE             | SNS-314                     | 24995524  | 0.125398499 |
| ACH-000102 | GMS10_CENTRAL_NERVOUS_SYSTEM     | AZD8330                     | 16666708  | 0.125400361 |
| ACH-000719 | RMGI_OVARY                       | elesclomol                  | 300471    | 0.125540566 |
| ACH-000991 | SNU81_LARGE_INTESTINE            | elesclomol                  | 300471    | 0.125547935 |
| ACH-000090 | PC3_PROSTATE                     | temoporfin                  | 60751     | 0.125609917 |
| ACH-000684 | KMRC1_KIDNEY                     | tanespimycin                | 6505803   | 0.125792429 |
| ACH-000759 | MDAMB175VII_BREAST               | paclitaxel                  | 36314     | 0.125823877 |
| ACH-000716 | TT2609C02_THYROID                | fluocinolone-acetonide      | 6215      | 0.125869506 |
| ACH-000066 | HCC4006_LUNG                     | litronesib                  | 25167017  | 0.125881514 |
| ACH-000155 | SW1990_PANCREAS                  | litronesib                  | 25167017  | 0.125962417 |
| ACH-000860 | NCIH358_LUNG                     | temsirolimus                | 129009966 | 0.126010502 |
| ACH-000808 | HUH28_BILIARY_TRACT              | CYT-997                     | 11351021  | 0.126189868 |
| ACH-000976 | HUCC11_BILIARY_TRACT             | idasanutlin                 | 53358942  | 0.126216367 |
| ACH-000651 | SW620_LARGE_INTESTINE            | SNS-314                     | 24995524  | 0.126238804 |
| ACH-000054 | HT1080_SOFT_TISSUE               | temoporfin                  | 60751     | 0.126259935 |
| ACH-000837 | NCIH322_LUNG                     | elesclomol                  | 300471    | 0.126267654 |
| ACH-000212 | CAL120_BREAST                    | tanespimycin                | 6505803   | 0.126291192 |
| ACH-000468 | PK45H_PANCREAS                   | tanespimycin                | 6505803   | 0.126407935 |
| ACH-000723 | YD10B_UPPER_AERODIGESTIVE_TRACT  | idasanutlin                 | 53358942  | 0.126415593 |
| ACH-000174 | CAL62_THYROID                    | NVP-BEZ235                  | 11977753  | 0.126445289 |
| ACH-000759 | MDAMB175VII_BREAST               | danusertib                  | 11442891  | 0.126480051 |

|            |                                   |                  |           |             |
|------------|-----------------------------------|------------------|-----------|-------------|
| ACH-000862 | KMBC2_URINARY_TRACT               | famciclovir      | 3324      | 0.126606021 |
| ACH-000351 | MKN1_STOMACH                      | temoporfin       | 60751     | 0.126657547 |
| ACH-000456 | BCPAP_THYROID                     | talazoparib      | 135565082 | 0.126693861 |
| ACH-000376 | SF295_CENTRAL_NERVOUS_SYSTEM      | ingenol-mebutate | 6918670   | 0.126711245 |
| ACH-000652 | SUIT2_PANCREAS                    | tanespimycin     | 6505803   | 0.126718802 |
| ACH-000826 | CAL12T_LUNG                       | pralatrexate     | 148121    | 0.126789363 |
| ACH-000810 | SKMEL30_SKIN                      | ingenol-mebutate | 6918670   | 0.126852237 |
| ACH-000946 | HEC265_ENDOMETRIUM                | ingenol-mebutate | 6918670   | 0.126858208 |
| ACH-000868 | HCC1195_LUNG                      | ispinesib        | 6851740   | 0.126864269 |
| ACH-000587 | NCIH1975_LUNG                     | alvocidib        | 5287969   | 0.126919052 |
| ACH-000191 | BHT101_THYROID                    | tanespimycin     | 6505803   | 0.126976711 |
| ACH-000595 | LN229_CENTRAL_NERVOUS_SYSTEM      | pralatrexate     | 148121    | 0.127046567 |
| ACH-000260 | SKNAS_AUTONOMIC_GANGLIA           | idasanutlin      | 53358942  | 0.127128178 |
| ACH-000408 | TE5_OESOPHAGUS                    | irinotecan       | 60838     | 0.127146791 |
| ACH-000759 | MDAMB175VII_BREAST                | MPI-0479605      | 46909588  | 0.127164167 |
| ACH-000359 | MG63_BONE                         | ispinesib        | 6851740   | 0.127190661 |
| ACH-000890 | SW1271_LUNG                       | NVP-BEZ235       | 11977753  | 0.127203065 |
| ACH-000774 | RERFLCAD2_LUNG                    | filanesib        | 44224257  | 0.127214681 |
| ACH-000759 | MDAMB175VII_BREAST                | KX2-391          | 23635314  | 0.127294299 |
| ACH-000042 | PANC0203_PANCREAS                 | idasanutlin      | 53358942  | 0.127372757 |
| ACH-000945 | NCIH650_LUNG                      | tanespimycin     | 6505803   | 0.127399414 |
| ACH-000967 | SNUC2A_LARGE_INTESTINE            | litronesib       | 25167017  | 0.127441558 |
| ACH-000651 | SW620_LARGE_INTESTINE             | idasanutlin      | 53358942  | 0.127473729 |
| ACH-000090 | PC3_PROSTATE                      | litronesib       | 25167017  | 0.127633482 |
| ACH-000163 | SW579_THYROID                     | birinapant       | 49836020  | 0.127673255 |
| ACH-000991 | SNU81_LARGE_INTESTINE             | everolimus       | 6442177   | 0.127811903 |
| ACH-000495 | TUHR4TKB_KIDNEY                   | paclitaxel       | 36314     | 0.127812285 |
| ACH-000407 | SNU685_ENDOMETRIUM                | batimastat       | 5362422   | 0.127842992 |
| ACH-000312 | SKNBE2_AUTONOMIC_GANGLIA          | piperazine       | 4837      | 0.127884971 |
| ACH-000827 | WM793_SKIN                        | EVP4593          | 509554    | 0.127904087 |
| ACH-000730 | SKMEL5_SKIN                       | ouabain          | 11527152  | 0.12803238  |
| ACH-001239 | WM2664_SKIN                       | KX2-391          | 23635314  | 0.128039635 |
| ACH-000132 | JHOS2_OVARY                       | tanespimycin     | 6505803   | 0.128046275 |
| ACH-000549 | SNU1076_UPPER_AERODIGESTIVE_TRACT | elesclomol       | 300471    | 0.128162666 |
| ACH-000147 | T47D_BREAST                       | barasertib-HQPA  | 16007391  | 0.128179204 |
| ACH-000688 | OV7_OVARY                         | GSK461364        | 15983966  | 0.128180413 |
| ACH-000532 | SNU61_LARGE_INTESTINE             | AT13387          | 11955716  | 0.128246153 |
| ACH-000968 | COLO792_SKIN                      | temsirolimus     | 129009966 | 0.128258267 |
| ACH-000630 | YD8_UPPER_AERODIGESTIVE_TRACT     | vinblastine      | 13342     | 0.128268064 |
| ACH-000685 | L33_PANCREAS                      | altretamine      | 2123      | 0.128301775 |
| ACH-000274 | HS852T_SKIN                       | colchicine       | 6167      | 0.128316798 |
| ACH-000231 | KALS1_CENTRAL_NERVOUS_SYSTEM      | piperazine       | 4837      | 0.128400194 |
| ACH-000903 | FTC133_THYROID                    | CYT-997          | 11351021  | 0.12851218  |

|            |                                   |                             |           |             |
|------------|-----------------------------------|-----------------------------|-----------|-------------|
| ACH-000178 | HS766T_PANCREAS                   | docetaxel                   | 148124    | 0.128637697 |
| ACH-000505 | RKN_SOFT_TISSUE                   | trametinib                  | 11707110  | 0.128749121 |
| ACH-000107 | CAPAN2_PANCREAS                   | GSK461364                   | 15983966  | 0.128752703 |
| ACH-000096 | G401_SOFT_TISSUE                  | dasatinib                   | 3062316   | 0.128773112 |
| ACH-000376 | SF295_CENTRAL_NERVOUS_SYSTEM      | paclitaxel                  | 36314     | 0.128789951 |
| ACH-000842 | SW480_LARGE_INTESTINE             | litronesib                  | 25167017  | 0.128814304 |
| ACH-000138 | CFPAC1_PANCREAS                   | litronesib                  | 25167017  | 0.128828263 |
| ACH-000403 | NCIH747_LARGE_INTESTINE           | paclitaxel                  | 36314     | 0.128940278 |
| ACH-000549 | SNU1076_UPPER_AERODIGESTIVE_TRACT | mubritinib                  | 6444692   | 0.12895797  |
| ACH-000505 | RKN_SOFT_TISSUE                   | SNS-314                     | 24995524  | 0.12896699  |
| ACH-000613 | HOS_BONE                          | ingenol-mebutate            | 6918670   | 0.129133788 |
| ACH-000035 | NCIH1650_LUNG                     | ispinesib                   | 6851740   | 0.129241163 |
| ACH-000862 | KMBC2_URINARY_TRACT               | altretamine                 | 2123      | 0.129385662 |
| ACH-000713 | CAOV3_OVARY                       | elesclomol                  | 300471    | 0.129421588 |
| ACH-000469 | YH13_CENTRAL_NERVOUS_SYSTEM       | tanespimycin                | 6505803   | 0.129454116 |
| ACH-000099 | SIMA_AUTONOMIC_GANGLIA            | elesclomol                  | 300471    | 0.129497154 |
| ACH-000142 | CAL29_URINARY_TRACT               | altretamine                 | 2123      | 0.129498497 |
| ACH-000273 | SF539_CENTRAL_NERVOUS_SYSTEM      | temoporfin                  | 60751     | 0.129499718 |
| ACH-000566 | SW1710_URINARY_TRACT              | temsirolimus                | 129009966 | 0.12951648  |
| ACH-000657 | A2780_OVARY                       | 7-aminocephalosporanic-acid | 441328    | 0.129531584 |
| ACH-000776 | ONS76_CENTRAL_NERVOUS_SYSTEM      | temsirolimus                | 129009966 | 0.129554672 |
| ACH-000309 | SKLU1_LUNG                        | 7-aminocephalosporanic-acid | 441328    | 0.12976029  |
| ACH-000450 | MELHO_SKIN                        | everolimus                  | 6442177   | 0.129808295 |
| ACH-000696 | OVCAR8_OVARY                      | temsirolimus                | 129009966 | 0.129829146 |
| ACH-000895 | CL34_LARGE_INTESTINE              | tanespimycin                | 6505803   | 0.129884219 |
| ACH-000237 | JHOM1_OVARY                       | piperazine                  | 4837      | 0.12993955  |
| ACH-000461 | SNU1196_BILIARY_TRACT             | ispinesib                   | 6851740   | 0.12995116  |
| ACH-000563 | EBC1_LUNG                         | idasanutlin                 | 53358942  | 0.129975875 |
| ACH-000903 | FTC133_THYROID                    | BNC105                      | 24786555  | 0.13002678  |
| ACH-000332 | YAPC_PANCREAS                     | dasatinib                   | 3062316   | 0.130064683 |
| ACH-000677 | SW1573_LUNG                       | elesclomol                  | 300471    | 0.130347828 |
| ACH-000813 | T3M10_LUNG                        | everolimus                  | 6442177   | 0.130418216 |
| ACH-000188 | SCC25_UPPER_AERODIGESTIVE_TRACT   | temoporfin                  | 60751     | 0.130485894 |
| ACH-000661 | WM1799_SKIN                       | trametinib                  | 11707110  | 0.130639812 |
| ACH-000680 | SW948_LARGE_INTESTINE             | BNC105                      | 24786555  | 0.130671013 |
| ACH-000771 | BICR56_UPPER_AERODIGESTIVE_TRACT  | KX2-391                     | 23635314  | 0.130758991 |
| ACH-001075 | NCIH292_LUNG                      | ispinesib                   | 6851740   | 0.130793089 |
| ACH-000921 | NCIH1339_LUNG                     | NVP-BEZ235                  | 11977753  | 0.130807088 |
| ACH-000893 | NCIH1651_LUNG                     | temsirolimus                | 129009966 | 0.13086309  |
| ACH-000946 | HEC265_ENDOMETRIUM                | talazoparib                 | 135565082 | 0.130925741 |
| ACH-000627 | LCLC103H_LUNG                     | temoporfin                  | 60751     | 0.130972809 |
| ACH-000351 | MKN1_STOMACH                      | MLN0128                     | 45375953  | 0.131092467 |
| ACH-000142 | CAL29_URINARY_TRACT               | piperazine                  | 4837      | 0.131187564 |

|            |                                  |                             |          |             |
|------------|----------------------------------|-----------------------------|----------|-------------|
| ACH-000320 | PSN1_PANCREAS                    | NVP-BEZ235                  | 11977753 | 0.13125957  |
| ACH-000139 | PANC0327_PANCREAS                | idasanutlin                 | 53358942 | 0.131267482 |
| ACH-000535 | BXPC3_PANCREAS                   | elesclomol                  | 300471   | 0.131281408 |
| ACH-000730 | SKMEL5_SKIN                      | AT13387                     | 11955716 | 0.131312608 |
| ACH-000945 | NCIH650_LUNG                     | rigosertib                  | 6918736  | 0.131381432 |
| ACH-000457 | CAL54_KIDNEY                     | KX2-391                     | 23635314 | 0.131570944 |
| ACH-000882 | IGR1_SKIN                        | ingenol-mebutate            | 6918670  | 0.131646255 |
| ACH-000479 | KNS81_CENTRAL_NERVOUS_SYSTEM     | tanespimycin                | 6505803  | 0.131727488 |
| ACH-000117 | EFM192A_BREAST                   | GSK461364                   | 15983966 | 0.131749787 |
| ACH-000771 | BICR56_UPPER_AERODIGESTIVE_TRACT | vincristine                 | 5388993  | 0.131753855 |
| ACH-000906 | ES2_OVARY                        | 7-aminocephalosporanic-acid | 441328   | 0.131765462 |
| ACH-000164 | PANC1_PANCREAS                   | BNC105                      | 24786555 | 0.131792262 |
| ACH-000368 | SNU1105_CENTRAL_NERVOUS_SYSTEM   | litronesib                  | 25167017 | 0.131815462 |
| ACH-000625 | HEP3B217_LIVER                   | verubulin                   | 11414799 | 0.131908969 |
| ACH-000231 | KALS1_CENTRAL_NERVOUS_SYSTEM     | MLN0128                     | 45375953 | 0.131966966 |
| ACH-000368 | SNU1105_CENTRAL_NERVOUS_SYSTEM   | irinotecan                  | 60838    | 0.131973873 |
| ACH-000176 | LOUNH91_LUNG                     | combretastatin-A-4          | 5351344  | 0.131996494 |
| ACH-000674 | NUGC4_STOMACH                    | elesclomol                  | 300471   | 0.13201834  |
| ACH-000035 | NCIH1650_LUNG                    | BAY-87-2243                 | 67377767 | 0.132033207 |
| ACH-000965 | RL952_ENDOMETRIUM                | famciclovir                 | 3324     | 0.132082551 |
| ACH-000835 | GCT_SOFT_TISSUE                  | tanespimycin                | 6505803  | 0.132087762 |
| ACH-000684 | KMRC1_KIDNEY                     | docetaxel                   | 148124   | 0.132089287 |
| ACH-000643 | HDQP1_BREAST                     | rigosertib                  | 6918736  | 0.132118312 |

**Table S14.** The drug target gene list. Based on the list of drugs obtained from the top 1% of predicted drug-cell line pairs, we found the target genes for these drugs from the PRISM database.

| Drug name    | Target gene ID                                                                                                                         |
|--------------|----------------------------------------------------------------------------------------------------------------------------------------|
| colchicine   | GLRA1, GLRA2, TUBA1A, TUBA1B, TUBA1C, TUBA3C, TUBA3D, TUBA3E, TUBA4A, TUBB, TUBB1, TUBB2A, TUBB2B, TUBB3, TUBB4A, TUBB4B, TUBB6, TUBB8 |
| docetaxel    | BCL2, MAP2, MAP4, MAPT, NR1I2, TUBB, TUBB1                                                                                             |
| filanesib    | KIF11                                                                                                                                  |
| JNJ-26481585 | HDAC1, HDAC10, HDAC11, HDAC2, HDAC3, HDAC4, HDAC5, HDAC6, HDAC7, HDAC8, HDAC9, MDM2                                                    |
| alvespimycin | HSP90AA1                                                                                                                               |
| NVP-AUY922   | HSP90AA1, HSP90AB1                                                                                                                     |
| NSC-319726   | NA                                                                                                                                     |
| ganetespib   | HSP90AA1                                                                                                                               |
| paclitaxel   | BCL2, MAP2, MAP4, MAPT, NR1I2, TLR4, TUBB, TUBB1                                                                                       |

|                    |                                                                                                                                                           |
|--------------------|-----------------------------------------------------------------------------------------------------------------------------------------------------------|
| LY2606368          | CHEK1                                                                                                                                                     |
| cabazitaxel        | TUBA4A, TUBB, TUBB1                                                                                                                                       |
| FK-866             | NAMPT                                                                                                                                                     |
| ispinesib          | KIF11                                                                                                                                                     |
| delanzomib         | CMA1, CTSG, CYP3A4, ELANE                                                                                                                                 |
| BNC105             | NA                                                                                                                                                        |
| BI-2536            | BRD4, PLK1, PLK2, PLK3                                                                                                                                    |
| bortezomib         | PSMA1, PSMA2, PSMA3, PSMA4, PSMA5, PSMA6, PSMA7, PSMA8, PSMB1, PSMB10, PSMB11, PSMB2, PSMB3, PSMB4, PSMB5, PSMB6, PSMB7, PSMB8, PSMB9, PSMD1, PSMD2, RELA |
| taltobulin         | NA                                                                                                                                                        |
| MPI-0479605        | TTK                                                                                                                                                       |
| pralatrexate       | DHFR, TYMS                                                                                                                                                |
| AZD8330            | NA                                                                                                                                                        |
| piperazine         | GABRB3                                                                                                                                                    |
| vindesine          | TUBB, TUBB1                                                                                                                                               |
| dinaciclib         | CDK1, CDK2, CDK5, CDK9                                                                                                                                    |
| epothilone-b       | TUBA1A, TUBA1B, TUBA1C, TUBA3C, TUBA4A, TUBA8, TUBB, TUBB1, TUBB3, TUBB4A, TUBB4B                                                                         |
| vincristine        | TUBA4A, TUBB                                                                                                                                              |
| selinexor          | XPO1                                                                                                                                                      |
| combretastatin-A-4 | NA                                                                                                                                                        |
| temsirolimus       | MTOR                                                                                                                                                      |
| vinblastine        | JUN, TUBA1A, TUBB, TUBD1, TUBE1, TUBG1                                                                                                                    |
| panobinostat       | HDAC1, HDAC2, HDAC3, HDAC4, HDAC6, HDAC7, HDAC8, HDAC9                                                                                                    |
| tanespimycin       | HSP90AA1                                                                                                                                                  |
| elesclomol         | HSPA1A                                                                                                                                                    |
| crystal-violet     | NA                                                                                                                                                        |
| rigosertib         | PLK1                                                                                                                                                      |
| BAY-87-2243        | HIF1A                                                                                                                                                     |
| litronesib         | KIF11                                                                                                                                                     |
| everolimus         | MTOR                                                                                                                                                      |
| floxuridine        | TYMS                                                                                                                                                      |
| trametinib         | MAP2K1, MAP2K2                                                                                                                                            |
| temoporfin         | NA                                                                                                                                                        |
| ingenol-mebutate   | PRKCA, PRKCB, PRKCD, PRKCE, PRKCG                                                                                                                         |
| raltitrexed        | FPGS, TYMS                                                                                                                                                |
| carfilzomib        | PSMA1, PSMA2, PSMA3, PSMA4, PSMA5, PSMA6, PSMA7, PSMA8, PSMB1, PSMB10, PSMB11, PSMB2, PSMB3, PSMB4, PSMB5, PSMB6, PSMB7, PSMB8, PSMB9                     |

|                                      |                                                                                            |
|--------------------------------------|--------------------------------------------------------------------------------------------|
| tosedostat                           | ANPEP, LAP3, NPEPPS                                                                        |
| danusertib                           | AURKA, AURKB, AURKC, FGFR1, NTRK1, RET, SLK                                                |
| poziotinib                           | EGFR, ERBB2, ERBB4                                                                         |
| vinflunine                           | NA                                                                                         |
| GSK461364                            | PLK1                                                                                       |
| Ro-4987655                           | MAP2K1                                                                                     |
| 7-aminocephalosporanic-acid          | NA                                                                                         |
| dasatinib                            | ABL1, ABL2, BLK, EPHA2, FGR, FRK, FYN, HCK, KIT, LCK, LYN, PDGFRB, SRC, SRMS, STAT5B, YES1 |
| altretamine                          | NA                                                                                         |
| NVP-BEZ235                           | ATR, MTOR, PIK3CA, PIK3CD, PIK3CG                                                          |
| KX2-391                              | SRC                                                                                        |
| mubritinib                           | EGFR, ERBB2                                                                                |
| cephalomannine                       | NA                                                                                         |
| irinotecan                           | TOP1, TOP1MT                                                                               |
| SNS-314                              | AURKA, AURKB, AURKC                                                                        |
| idasanutlin                          | MDM2, TP53                                                                                 |
| plinabulin                           | NA                                                                                         |
| alvocidib                            | CDK1, CDK2, CDK4, CDK5, CDK6, CDK7, CDK8, CDK9, EGFR, PYGM                                 |
| MLN0128                              | MTOR, PIK3CA, PIK3CD, PIK3CG                                                               |
| PD-0325901                           | MAP2K1                                                                                     |
| PF-477736                            | CHEK1, CHEK2                                                                               |
| AS-703026                            | MAP2K1, MAP2K2                                                                             |
| talazoparib                          | PARP2                                                                                      |
| volasertib                           | PLK1                                                                                       |
| ouabain                              | ATP1A1                                                                                     |
| fluocinolone-acetonide               | NR3C1, SERPINA6                                                                            |
| CYT-997                              | TUBB                                                                                       |
| barasertib-HQPA                      | AURKB                                                                                      |
| D-64131                              | TUBB                                                                                       |
| TAK-733                              | MAP2K1                                                                                     |
| verubulin                            | TUBB                                                                                       |
| desonide                             | NR3C1, PLA2G1B                                                                             |
| napabucasin                          | STAT3                                                                                      |
| BMS-626529                           | NA                                                                                         |
| 12-O-tetradecanoylphorbol-13-acetate | KCNT2, TRPV4                                                                               |
| AZD8931                              | EGFR, ERBB2, ERBB3                                                                         |
| cobimetinib                          | NA                                                                                         |
| dabrafenib                           | BRAF, LIMK1, NEK11, RAF1, SIK1                                                             |
| tipifarnib                           | FNTA, FNTB                                                                                 |
| birinapant                           | BIRC2, XIAP                                                                                |
| pelitinib                            | EGFR                                                                                       |

|             |                                                                                                                                                          |
|-------------|----------------------------------------------------------------------------------------------------------------------------------------------------------|
| AT13387     | HSP90AA1                                                                                                                                                 |
| temazepam   | GABRA1, GABRA2, GABRA3, GABRA4, GABRA5, GABRA6, GABRB1, GABRB2, GABRB3, GABRD, GABRE, GABRG1, GABRG2, GABRG3, GABRP, GABRQ, GABRR1, GABRR2, GABRR3, TSPO |
| navitoclax  | BCL2, BCL2L1, BCL2L2                                                                                                                                     |
| EVP4593     | NA                                                                                                                                                       |
| famciclovir | NA                                                                                                                                                       |
| batimastat  | ADAM28, ADAMTS5, MMP12, MMP16, MMP2, MMP8                                                                                                                |
